# Supplementary material for: Enterococcus faecalis reconfigures its transcriptional regulatory network activation at different copper levels
Source: Royal Society of Chemistry journal article supplement (doi:10.1039/c3mt00288h), 2013-12-04
Supplement: c3mt00288h.xlsx [file c3mt00288h.xlsx]

## Sheet: Supplementary Table 1
Supplementary Table 1: Global transcriptional regulatory network E. faecalis data.
GENE ID*	COG Annotation	Gene Name	EC Number	Operon ID	First Gene Operon	Genes per Operon	Start Operon	COG Operon1	TF2	BS	BS Position	Homology order3	WT 0.05 mM Cu	WT 0.5 mM Cu	cop∆ 0.05 mM Cu	cop∆ 0.5 mM Cu	WT Zn	WT Fe
EF0050	NoCOG			EF0050-EF0051	EF0050	2	52192	3	Fis	tgaataaaaattcgaca	52071	8				up		up
EF0051	[I] 4-diphosphocytidyl-2-C-methyl-D-erythritol kinase	ispE	2.7.1.-	EF0050-EF0051	EF0050	2	52192	3	Fis	tgaataaaaattcgaca	52071	8				up		up
EF0791	[K] transcriptional regulator, TetR family			EF0791	EF0791	1	752054	1	LysR	attgattgtatatttttcgttttt	751961	3				up		down
EF0891	[E] aspartate aminotransferase			EF0891-EF0893	EF0893	3	860186	3	ArgR	gtataaaaattta	860243	8	up	up		up	down
EF0892	[E] amino acid ABC transporter, ATP-binding protein			EF0891-EF0893	EF0893	3	860186	3	ArgR	gtataaaaattta	860243	8	up	up		up	down
EF0893	[E] amino acid ABC transporter, amino acid-binding/permease protein			EF0891-EF0893	EF0893	3	860186	3	ArgR	gtataaaaattta	860243	8	up	up		up	down
EF1262	[R] hypothetical protein			EF1262-EF1263	EF1263	2	1230248	5	ArgR	atgaattaattatgaa	1230292	1	up	up		up	down
EF1263	NoCOG			EF1262-EF1263	EF1263	2	1230248	5	ArgR	atgaattaattatgaa	1230292	1	up	up		up	down
EF1531	[K] transcriptional regulator, TetR family			EF1531-EF1533	EF1531	3	1487675	5	CRP-FNR	tttgtgtgaacataataaag	1487621	2				up
EF1532	NoCOG			EF1531-EF1533	EF1531	3	1487675	5	CRP-FNR	tttgtgtgaacataataaag	1487621	2				up
EF1533	NoCOG			EF1531-EF1533	EF1531	3	1487675	5	CRP-FNR	tttgtgtgaacataataaag	1487621	2				up
EF1615	[L] DNA topoisomerase IV subunit B	parE	5.99.1.-	EF1615-EF1616	EF1616	2	1576370	1	LysR	taaaatatcaaaaatttgattttg	1576326	8				up		down
EF1616	[R] CoA-binding domain protein			EF1615-EF1616	EF1616	2	1576370	1	LysR	taaaatatcaaaaatttgattttg	1576326	8				up		down
EF1904	[C] glycerophosphoryl diester phosphodiesterase family protein			EF1904	EF1904	1	1847769	3	Fis	tgattattttattagca	1847574	6				up
EF2494	[I] phosphatidate cytidylyltransferase	cdsA	2.7.7.41	EF2494-EF2495	EF2495	2	2420748	3	CRP-FNR	tatcttaattattataac	2420774	8				up		up
EF2495	[I] undecaprenyl diphosphate synthase	uppS	2.5.1.31	EF2494-EF2495	EF2495	2	2420748	3	CRP-FNR	tatcttaattattataac	2420774	8				up		up
EF2703	[K] transcriptional regulator			EF2703	EF2703	1	2617295	1	LysR	aaaagcctctcttttttgttattt	2617458	2	up			up	up
EF2894	[J] general stress protein 13, putative			EF2894	EF2894	1	2774878	1	PhoP	agttatcttatgttta	2775053	8				up
EF2910	[P] potassium uptake protein			EF2910	EF2910	1	2789010	2	PhoP	atttatctgatattta	2789101	4				up		up
EF2985	[V] permease, putative			EF2985-EF2987	EF2987	3	2862036	4	LysR	agaataaacgttttttgttatttt	2862186	8	up	up		up
EF2986	[V] ABC transporter, ATP-binding protein			EF2985-EF2987	EF2987	3	2862036	4	LysR	agaataaacgttttttgttatttt	2862186	8	up	up		up
EF2987	[M] hypothetical protein			EF2985-EF2987	EF2987	3	2862036	4	LysR	agaataaacgttttttgttatttt	2862186	8	up	up		up
EF0297	[K] transcriptional repressor CopY	copY		EF0297-EF0299	EF0297	3	282822	2	CopY	aattacagatgcaga	282845	8	up	up	down	down		up
EF0298	[P] copper-translocating P-type ATPase		3.6.3.4	EF0297-EF0299	EF0297	3	282822	2	CopY	aattacagatgcaga	282845	8	up	up	down	down		up
EF0299	[P] copper transport protein CopZ	copZ		EF0297-EF0299	EF0297	3	282822	2	CopY	aattacagatgcaga	282845	8	up	up	down	down		up
EF1107	NoCOG			EF1107-EF1110	EF1107	4	1075884	3	CRP-FNR	tttttgtgtgaaaatgcaca	1075714	2			down	down		up
EF1108	[C] oxidoreductase, putative			EF1107-EF1110	EF1107	4	1075884	3	CRP-FNR	tttttgtgtgaaaatgcaca	1075714	2			down	down		up
EF1109	[C] iron-sulfur cluster binding protein			EF1107-EF1110	EF1107	4	1075884	3	CRP-FNR	tttttgtgtgaaaatgcaca	1075714	2			down	down		up
EF1110	[S] YkgG family protein			EF1107-EF1110	EF1107	4	1075884	3	CRP-FNR	tttttgtgtgaaaatgcaca	1075714	2			down	down		up
EF2678	[P] hypothetical protein			EF2678	EF2678	1	2589935	2	LysR	aaaaaagtaatacagttttctatt	2590146	7			down	down
EF0115	[J] endoribonuclease L-PSP, putative			EF0115	EF0115	1	120325	1	DeoR	tgttggaatgcta	120295	1				down
EF0362	[S] chitin binding protein, putative			EF0362	EF0362	1	330865	5	GalR-S	tgtatgcgcttac	330892	3				down
EF0362	[S] chitin binding protein, putative			EF0362	EF0362	1	330865	5	LysR	aaaaataacatttcttattatttg	330938	3				down
EF0720	[P] voltage-gated chloride channel family protein			EF0720	EF0720	1	676608	2	LysR	aagaaaaagattttttgttctttt	676683	7				down
EF0731	[K] transcriptional regulator, luxR family			EF0731	EF0731	1	689127	1	ArgR	tgaatgatttttc	689280	2				down
EF0731	[K] transcriptional regulator, luxR family			EF0731	EF0731	1	689127	1	LysR	aataaaaaaatcggttgtttattt	689141	2				down
EF0743	NoCOG			EF0743	EF0743	1	699371	5	GalR-S	tgcatacgcttac	699367	1				down		down
EF1012	[G] PTS system, IIB component			EF1012-EF1016	EF1012	5	972246	3	GalR-S	tgtaagcgttttc	972102	8				down
EF1013	[G] PTS system, IIC component			EF1012-EF1016	EF1012	5	972246	3	GalR-S	tgtaagcgttttc	972102	8				down
EF1014	NoCOG			EF1012-EF1016	EF1012	5	972246	3	GalR-S	tgtaagcgttttc	972102	8				down
EF1015	NoCOG			EF1012-EF1016	EF1012	5	972246	3	GalR-S	tgtaagcgttttc	972102	8				down
EF1016	NoCOG			EF1012-EF1016	EF1012	5	972246	3	GalR-S	tgtaagcgttttc	972102	8				down
EF1041	[R] xanthine/uracil permeases family protein			EF1041	EF1041	1	1002913	5	LysR	aatatatatataatagttaatatt	1002807	8		down		down
EF1121	[M] glutamate racemase	murI	5.1.1.3	EF1121-EF1123	EF1121	3	1094868	3	LysR	tacaaaaaaatgaattactagttt	1094722	8				down		down
EF1122	[F] ribonuclease PH/Ham1 protein	rph	2.7.7.56	EF1121-EF1123	EF1121	3	1094868	3	LysR	tacaaaaaaatgaattactagttt	1094722	8				down		down
EF1123	[R] hypothetical protein			EF1121-EF1123	EF1121	3	1094868	3	LysR	tacaaaaaaatgaattactagttt	1094722	8				down		down
EF1596	NoCOG			EF1596	EF1596	1	1547695	5	LysR	aataaaagggaattaattttttat	1547652	1				down
EF2430	[F] xanthine/uracil permease family protein			EF2430-EF2431	EF2431	2	2351306	3	CRP-FNR	aatgtgatttttttaaaa	2351369	1		down		down	down
EF2430	[F] xanthine/uracil permease family protein			EF2430-EF2431	EF2431	2	2351306	3	LysR	taactataaaaatgtgatttttt	2351359	1		down		down	down
EF2431	[FR] chlorohydrolase family protein			EF2430-EF2431	EF2431	2	2351306	3	CRP-FNR	aatgtgatttttttaaaa	2351369	1		down		down	down
EF2431	[FR] chlorohydrolase family protein			EF2430-EF2431	EF2431	2	2351306	3	LysR	taactataaaaatgtgatttttt	2351359	1		down		down	down
EF2708	[S] membran protein, putative			EF2708	EF2708	1	2621407	5	LysR	aaaaagcaataatttctgataatt	2621511	8		down		down		up
EF3003	NoCOG			EF3003	EF3003	1	2876262	5	LysR	ataaaataattatttcttttgtt	2876189	1				down
EF3004	[P] sulfate transporter family/STAS domain protein			EF3004	EF3004	1	2878737	2	CRP-FNR	ttgtgaaggaaatcgcta	2878805	2				down		down
EF3004	[P] sulfate transporter family/STAS domain protein			EF3004	EF3004	1	2878737	2	Fis	tgtctaatattttagga	2878854	2				down		down
EF3249	NoCOG			EF3249	EF3249	1	3123490	5	LysR	tatattgaaaactaattatttttt	3123393	1				down
EF3327	[C] citrate transporter			EF3327	EF3327	1	3212085	3	GalR-S	tgttaacgcttac	3212040	2				down
EF3327	[C] citrate transporter			EF3327	EF3327	1	3212085	3	LysR	tattaatattatattaagttatta	3211842	2				down
EF3328	[K] transcriptional regulator, GntR family			EF3328	EF3328	1	3213616	1	LysR	attttcatttttaatattatattt	3213555	2				down
EF0100	[J] seryl-tRNA synthetase	serS-1	6.1.1.11	EF0100	EF0100	1	103833	3	Fis	tgtttaaaatttaatca	103800	8			up		down
EF3257	[C] oxidoreductase, pyridine nucleotide-disulfide family			EF3257	EF3257	1	3135116	3	CRP-FNR	tgtgatacattacacatt	3134885	3			up
EF1958	[F] deoxyguanosinetriphosphate triphosphohydrolase			EF1958-EF1959	EF1959	2	1897603	3	LysR	aaaataacaattattttgttttat	1897711	1			down
EF1959	NoCOG			EF1958-EF1959	EF1959	2	1897603	3	LysR	aaaataacaattattttgttttat	1897711	1			down
EF2559	[C] pyruvate flavodoxin/ferredoxin oxidoreductase family protein			EF2559-EF2562	EF2562	4	2478766	3	GalR-S	tgtaaccccttac	2478820	8			down
EF2559	[C] pyruvate flavodoxin/ferredoxin oxidoreductase family protein			EF2559-EF2562	EF2562	4	2478766	3	LysR	aaaataacttttacaaatgatttt	2478846	8			down
EF2560	[ER] glutamate synthase (NADPH), homotetrameric	gltA	1.4.1.13	EF2559-EF2562	EF2562	4	2478766	3	GalR-S	tgtaaccccttac	2478820	8			down
EF2560	[ER] glutamate synthase (NADPH), homotetrameric	gltA	1.4.1.13	EF2559-EF2562	EF2562	4	2478766	3	LysR	aaaataacttttacaaatgatttt	2478846	8			down
EF2561	[HC] dihydroorotate dehydrogenase electron transfer subunit, putative			EF2559-EF2562	EF2562	4	2478766	3	GalR-S	tgtaaccccttac	2478820	8			down
EF2561	[HC] dihydroorotate dehydrogenase electron transfer subunit, putative			EF2559-EF2562	EF2562	4	2478766	3	LysR	aaaataacttttacaaatgatttt	2478846	8			down
EF2562	[C] flavodoxin			EF2559-EF2562	EF2562	4	2478766	3	GalR-S	tgtaaccccttac	2478820	8			down
EF2562	[C] flavodoxin			EF2559-EF2562	EF2562	4	2478766	3	LysR	aaaataacttttacaaatgatttt	2478846	8			down
EF2727	[K] phosphosugar-binding transcriptional regulator, putative			EF2727	EF2727	1	2638330	1	LysR	aaaaacacctcatttttttatttt	2638253	2			down
EF0001	[L] chromosomal replication initiator protein DnaA	dnaA		EF0001-EF0002	EF0001	2	59	1	DnaA	ttatccac	8	8						up
EF0002	[L] DNA polymerase III, beta subunit	dnaN	2.7.7.7	EF0001-EF0002	EF0001	2	59	1	DnaA	ttatccac	8	8						up
EF0014	NoCOG	purA	6.3.4.4	EF0014	EF0014	1	15044	5	LysR	atattcgtatattttattatttta	14880	8
EF0020	[G] PTS system, mannose-specific IIAB components			EF0020-EF0024	EF0020	5	23088	5	LysR	aaaatcaagaactattgaaatttt	22957	8						up
EF0021	NoCOG		2.7.1.69	EF0020-EF0024	EF0020	5	23088	5	LysR	aaaatcaagaactattgaaatttt	22957	8						up
EF0022	NoCOG			EF0020-EF0024	EF0020	5	23088	5	LysR	aaaatcaagaactattgaaatttt	22957	8						up
EF0024	NoCOG			EF0020-EF0024	EF0020	5	23088	5	LysR	aaaatcaagaactattgaaatttt	22957	8						up
EF0025	[S] hypothetical protein			EF0025	EF0025	1	26639	5	LysR	ataataagtgtaataaattatttt	26598	3
EF0028	[G] PTS system, IIBC components		2.7.1.69	EF0028-EF0029	EF0028	2	28533	3	ArgR	tgaatgtaaacgc	28477	8
EF0029	[E] aminotransferase, class II			EF0028-EF0029	EF0028	2	28533	3	ArgR	tgaatgtaaacgc	28477	8
EF0039	NoCOG			EF0039-EF0049	EF0039	11	42257	1	LysR	aataaacaaaaattctcctctttt	42120	8						up
EF0040	[O] DNA repair protein RadA	radA		EF0039-EF0049	EF0039	11	42257	1	LysR	aataaacaaaaattctcctctttt	42120	8						up
EF0041	[R] PIN domain protein			EF0039-EF0049	EF0039	11	42257	1	LysR	aataaacaaaaattctcctctttt	42120	8						up
EF0042	NoCOG	ispF	4.6.1.12	EF0039-EF0049	EF0039	11	42257	1	LysR	aataaacaaaaattctcctctttt	42120	8						up
EF0043	[J] glutamyl-tRNA synthetase	gltX	6.1.1.17	EF0039-EF0049	EF0039	11	42257	1	LysR	aataaacaaaaattctcctctttt	42120	8						up
EF0044	[E] serine O-acetyltransferase	cysE	2.3.1.30	EF0039-EF0049	EF0039	11	42257	1	LysR	aataaacaaaaattctcctctttt	42120	8						up
EF0045	[J] cysteinyl-tRNA synthetase	cysS	6.1.1.16	EF0039-EF0049	EF0039	11	42257	1	LysR	aataaacaaaaattctcctctttt	42120	8						up
EF0046	[S] hypothetical protein			EF0039-EF0049	EF0039	11	42257	1	LysR	aataaacaaaaattctcctctttt	42120	8						up
EF0047	[J] RNA methyltransferase, TrmH family			EF0039-EF0049	EF0039	11	42257	1	LysR	aataaacaaaaattctcctctttt	42120	8						up
EF0048	NoCOG			EF0039-EF0049	EF0039	11	42257	1	LysR	aataaacaaaaattctcctctttt	42120	8						up
EF0049	[K] sigma-70 factor family protien			EF0039-EF0049	EF0039	11	42257	1	LysR	aataaacaaaaattctcctctttt	42120	8						up
EF0052	NoCOG			EF0052-EF0054	EF0054	3	55435	5	LysR	aaaaagcaaaggaacatccttatt	55607	4
EF0053	[L] DNA polymerase III, epsilon subunit	dnaQ	2.7.7.7	EF0052-EF0054	EF0054	3	55435	5	LysR	aaaaagcaaaggaacatccttatt	55607	4
EF0054	NoCOG			EF0052-EF0054	EF0054	3	55435	5	LysR	aaaaagcaaaggaacatccttatt	55607	4
EF0055	[P] adhesion lipoprotein			EF0055-EF0057	EF0055	3	55754	2	Fur	taaaccgtaatatttacgatttg	55643	8					down
EF0056	[P] ABC transporter, ATP-binding protein			EF0055-EF0057	EF0055	3	55754	2	Fur	taaaccgtaatatttacgatttg	55643	8					down
EF0057	[P] ABC transporter, permease protein			EF0055-EF0057	EF0055	3	55754	2	Fur	taaaccgtaatatttacgatttg	55643	8					down
EF0059	[M] UDP-N-acetylglucosamine pyrophosphorylase	glmU	2.7.7.23	EF0059	EF0059	1	59602	4	LysR	gaaaatcaaacaatttagttaatt	59565	8
EF0063	[E] pheromone binding protein, putative			EF0063	EF0063	1	65497	3	LysR	aaaattaaaaaatgaagagttttt	65454	8
EF0066	[L] Holliday junction DNA helicase RuvA	ruvA		EF0066-EF0067	EF0066	2	68667	1	LexA	gaacatatgtac	68628	8		up				up
EF0067	[L] Holliday junction DNA helicase RuvB	ruvB		EF0066-EF0067	EF0066	2	68667	1	LexA	gaacatatgtac	68628	8		up				up
EF0068	NoCOG			EF0068	EF0068	1	70871	5	GalR-S	ttgtaatcgcttttaa	71055	1
EF0069	[G] N-acetylmannosamine-6-phosphate epimerase, putative			EF0069	EF0069	1	71084	3	GalR-S	ttgtaatcgcttttaa	71055	8
EF0073	NoCOG			EF0073	EF0073	1	74846	5	CRP-FNR	aatattatttttattata	74815	1
EF0073	NoCOG			EF0073	EF0073	1	74846	5	LysR	aaaaataatatttaatattatttt	74802	1
EF0074	[T] transcriptional regulator, Crp/Fnr family			EF0074	EF0074	1	76463	2	LysR	atgagtattaaaaatattttttta	76641	5
EF0076	[IQR] oxidoreductase, short chain dehydrogenase/reductase family			EF0076-EF0079	EF0076	4	76736	5	LysR	atgagtattaaaaatattttttta	76641	8					up
EF0077	NoCOG			EF0076-EF0079	EF0076	4	76736	5	LysR	atgagtattaaaaatattttttta	76641	8					up
EF0078	NoCOG			EF0076-EF0079	EF0076	4	76736	5	LysR	atgagtattaaaaatattttttta	76641	8					up
EF0079	NoCOG			EF0076-EF0079	EF0076	4	76736	5	LysR	atgagtattaaaaatattttttta	76641	8					up
EF0091	[K] hypothetical protein			EF0091	EF0091	1	92973	1	LysR	aataaaagaaacaactgttatttt	92887	3						down
EF0102	[K] transcriptional regulator, ArgR family			EF0102	EF0102	1	106701	1	MalI	acaacgtttt	106787	3						up
EF0103	[K] transcriptional regulator, ArgR family			EF0103	EF0103	1	106944	1	MalI	acaacgtttt	106787	1		up				up
EF0104	[E] arginine deiminase	arcA	3.5.3.6	EF0104-EF0105	EF0104	2	107729	3	ArgR	tatttaattatgcatt	107550	6		up				down
EF0104	[E] arginine deiminase	arcA	3.5.3.6	EF0104-EF0105	EF0104	2	107729	3	LysR	aataaatgcatttttttttattta	107532	6		up				down
EF0105	[E] ornithine carbamoyltransferase	argF-1	2.1.3.3	EF0104-EF0105	EF0104	2	107729	3	ArgR	tatttaattatgcatt	107550	6		up				down
EF0105	[E] ornithine carbamoyltransferase	argF-1	2.1.3.3	EF0104-EF0105	EF0104	2	107729	3	LysR	aataaatgcatttttttttattta	107532	6		up				down
EF0112	[K] hypothetical protein			EF0112-EF0113	EF0112	2	115686	1	LysR	aaatatataaattaaaaatatatt	115644	1					down
EF0113	[K] hypothetical protein			EF0112-EF0113	EF0112	2	115686	1	LysR	aaatatataaattaaaaatatatt	115644	1					down
EF0124	NoCOG			EF0124	EF0124	1	129308	5	ArgR	taattaatattaa	129451	1
EF0124	NoCOG			EF0124	EF0124	1	129308	5	LysR	agataatttaaaaaatgtaattaa	129434	1
EF0125	[L] IS256, transposase			EF0125	EF0125	1	129645	1	ArgR	taattaatattaa	129451	1	up
EF0125	[L] IS256, transposase			EF0125	EF0125	1	129645	1	LysR	agataatttaaaaaatgtaattaa	129434	1	up
EF0125	[L] IS256, transposase			EF0125	EF0125	1	129645	1	PhoP	tgtaattaatattaaa	129449	1	up
EF0127	NoCOG			EF0127	EF0127	1	132152	5	ArgR	ttattttaaatta	132037	1
EF0127	NoCOG			EF0127	EF0127	1	132152	5	LysR	aaaaaactatgttgtttaaactta	132075	1
EF0128	NoCOG			EF0128-EF0129	EF0129	2	133788	5	LysR	aacatatatttaaaatagatttt	133825	3
EF0129	NoCOG			EF0128-EF0129	EF0129	2	133788	5	LysR	aacatatatttaaaatagatttt	133825	3
EF0132	NoCOG			EF0132-EF0133	EF0132	2	135317	5	ArgR	gtataaaaattaa	135285	1					down
EF0133	NoCOG			EF0132-EF0133	EF0132	2	135317	5	ArgR	gtataaaaattaa	135285	1					down
EF0145	NoCOG			EF0145-EF0147	EF0145	3	142958	5	ArgR	atgactaaaaaattaa	142958	1
EF0145	NoCOG			EF0145-EF0147	EF0145	3	142958	5	LysR	taataaatattattttgttattgt	142914	1
EF0146	NoCOG			EF0145-EF0147	EF0145	3	142958	5	ArgR	atgactaaaaaattaa	142958	1
EF0146	NoCOG			EF0145-EF0147	EF0145	3	142958	5	LysR	taataaatattattttgttattgt	142914	1
EF0147	NoCOG			EF0145-EF0147	EF0145	3	142958	5	ArgR	atgactaaaaaattaa	142958	1
EF0147	NoCOG			EF0145-EF0147	EF0145	3	142958	5	LysR	taataaatattattttgttattgt	142914	1
EF0149	NoCOG			EF0149	EF0149	1	146450	5	MalI	aaaacgtttt	146473	2					down
EF0157	NoCOG			EF0157	EF0157	1	155603	5	CRP-FNR	tttttaatgtaaattatt	155719	1
EF0157	NoCOG			EF0157	EF0157	1	155603	5	LysR	atttttaatgtaaattattttaat	155718	1
EF0158	NoCOG			EF0158-EF0163	EF0158	6	155767	5	CRP-FNR	tttttaatgtaaattatt	155719	2
EF0158	NoCOG			EF0158-EF0163	EF0158	6	155767	5	LysR	atttttaatgtaaattattttaat	155718	2
EF0159	NoCOG			EF0158-EF0163	EF0158	6	155767	5	CRP-FNR	tttttaatgtaaattatt	155719	2
EF0159	NoCOG			EF0158-EF0163	EF0158	6	155767	5	LysR	atttttaatgtaaattattttaat	155718	2
EF0160	NoCOG			EF0158-EF0163	EF0158	6	155767	5	CRP-FNR	tttttaatgtaaattatt	155719	2
EF0160	NoCOG			EF0158-EF0163	EF0158	6	155767	5	LysR	atttttaatgtaaattattttaat	155718	2
EF0161	NoCOG			EF0158-EF0163	EF0158	6	155767	5	CRP-FNR	tttttaatgtaaattatt	155719	2
EF0161	NoCOG			EF0158-EF0163	EF0158	6	155767	5	LysR	atttttaatgtaaattattttaat	155718	2
EF0162	NoCOG			EF0158-EF0163	EF0158	6	155767	5	CRP-FNR	tttttaatgtaaattatt	155719	2
EF0162	NoCOG			EF0158-EF0163	EF0158	6	155767	5	LysR	atttttaatgtaaattattttaat	155718	2
EF0163	NoCOG			EF0158-EF0163	EF0158	6	155767	5	CRP-FNR	tttttaatgtaaattatt	155719	2
EF0163	NoCOG			EF0158-EF0163	EF0158	6	155767	5	LysR	atttttaatgtaaattattttaat	155718	2
EF0188	[P] iron compound ABC transporter, substrate-binding protein			EF0188	EF0188	1	184342	2	Fur	agtgagaacgattctcaataaat	184520	4		up				down
EF0191	[PH] ferrichrome ABC transporter, ATP-binding protein			EF0191-EF0193	EF0191	3	184579	2	Fur	agtgagaacgattctcaataaat	184520	5		up				down
EF0192	[P] ferrichrome ABC transporter, permease protein			EF0191-EF0193	EF0191	3	184579	2	Fur	agtgagaacgattctcaataaat	184520	5		up				down
EF0193	[P] ferrichrome ABC transporter, permease protein	fhuG		EF0191-EF0193	EF0191	3	184579	2	Fur	agtgagaacgattctcaataaat	184520	5		up				down
EF0202	[H] phosphomethylpyrimidine kinase, putative			EF0202	EF0202	1	195887	4	CRP-FNR	aaatcgttaaataattaact	195692	1
EF0202	[H] phosphomethylpyrimidine kinase, putative			EF0202	EF0202	1	195887	4	Fis	tggctaaaaaataagcc	195808	1
EF0235	NoCOG			EF0235	EF0235	1	213015	5	PurR	gcaaatgtttgct	213020	2
EF0253	[C] aldehyde dehydrogenase			EF0253	EF0253	1	229558	3	ArgR	tgagtaaaaaagaaat	229559	4
EF0253	[C] aldehyde dehydrogenase			EF0253	EF0253	1	229558	3	GalR-S	tgtaagcggatac	229521	4
EF0282	[I] enoyl-(acyl carrier protein) reductase	fabI	1.3.1.9	EF0282	EF0282	1	268311	3	ArgR	tgaattattaacc	268492	3						down
EF0282	[I] enoyl-(acyl carrier protein) reductase	fabI	1.3.1.9	EF0282	EF0282	1	268311	3	CRP-FNR	ctgtgtgagaatgataac	268421	3						down
EF0283	[IQ] 3-oxoacyl-(acyl-carrier-protein) synthase II	fabF-1	2.3.1.41	EF0283-EF0284	EF0283	2	268609	3	ArgR	tgaattattaacc	268492	8						down
EF0283	[IQ] 3-oxoacyl-(acyl-carrier-protein) synthase II	fabF-1	2.3.1.41	EF0283-EF0284	EF0283	2	268609	3	CRP-FNR	ctgtgtgagaatgataac	268421	8						down
EF0284	[I] (3R)-hydroxymyristoyl-(acyl-carrier-protein) dehydratase	fabZ-1	4.2.1.-	EF0283-EF0284	EF0283	2	268609	3	ArgR	tgaattattaacc	268492	8						down
EF0284	[I] (3R)-hydroxymyristoyl-(acyl-carrier-protein) dehydratase	fabZ-1	4.2.1.-	EF0283-EF0284	EF0283	2	268609	3	CRP-FNR	ctgtgtgagaatgataac	268421	8						down
EF0286	NoCOG			EF0286	EF0286	1	272082	5	ArgR	gattttaaattcc	272083	3
EF0293	[K] phosphosugar-binding transcriptional regulator, putative			EF0293	EF0293	1	279223	1	LysR	atcaaataaaccaattcttatttt	279272	5
EF0294	[H] hypothetical protein			EF0294	EF0294	1	279470	4	LysR	aaaaactgaatatgttattttttt	279242	3						up
EF0303	NoCOG			EF0303	EF0303	1	290568	5	LexA	gaacttacgttc	290589	3
EF0329	NoCOG			EF0329-EF0330	EF0329	2	304826	1	LysR	atatatagaaataattaatataca	304646	2
EF0330	[KL] SNF2 domain protein			EF0329-EF0330	EF0329	2	304826	1	LysR	atatatagaaataattaatataca	304646	2
EF0356	NoCOG			EF0356-EF0358	EF0358	3	328166	5	CRP-FNR	tttttgattaattaacttac	328196	2						up
EF0356	NoCOG			EF0356-EF0358	EF0358	3	328166	5	LysR	agaaaaataattttttgattaatt	328185	2						up
EF0357	[R] hypothetical protein			EF0356-EF0358	EF0358	3	328166	5	CRP-FNR	tttttgattaattaacttac	328196	2						up
EF0357	[R] hypothetical protein			EF0356-EF0358	EF0358	3	328166	5	LysR	agaaaaataattttttgattaatt	328185	2						up
EF0358	[E] glyoxalase family protein			EF0356-EF0358	EF0358	3	328166	5	CRP-FNR	tttttgattaattaacttac	328196	2						up
EF0358	[E] glyoxalase family protein			EF0356-EF0358	EF0358	3	328166	5	LysR	agaaaaataattttttgattaatt	328185	2						up
EF0359	[P] sugE protein	sugE-1		EF0359-EF0360	EF0359	2	328453	2	CRP-FNR	tttttgattaattaacttac	328196	1
EF0359	[P] sugE protein	sugE-1		EF0359-EF0360	EF0359	2	328453	2	LysR	agaaaaataattttttgattaatt	328185	1
EF0360	[P] sugE protein	sugE-2		EF0359-EF0360	EF0359	2	328453	2	CRP-FNR	tttttgattaattaacttac	328196	1
EF0360	[P] sugE protein	sugE-2		EF0359-EF0360	EF0359	2	328453	2	LysR	agaaaaataattttttgattaatt	328185	1
EF0363	[L] ISEf1, transposase			EF0363	EF0363	1	331108	1	GalR-S	tgtatgcgcttac	330892	3
EF0363	[L] ISEf1, transposase			EF0363	EF0363	1	331108	1	LysR	aaaaataacatttcttattatttg	330938	3
EF0365	[I] hypothetical protein			EF0365	EF0365	1	332486	3	LysR	ataatataaataatagtgttttt	332353	8		down
EF0370	[D] septation ring formation regulator EzrA			EF0370-EF0371	EF0370	2	337091	3	ArgR	tgaatgaatatac	336946	8						down
EF0371	[E] aminotransferase, class V			EF0370-EF0371	EF0370	2	337091	3	ArgR	tgaatgaatatac	336946	8						down
EF0372	[TK] DNA-binding response regulator			EF0372-EF0373	EF0373	2	342321	2	Fis	tgtttataatttgttca	342417	1
EF0372	[TK] DNA-binding response regulator			EF0372-EF0373	EF0373	2	342321	2	LysR	aaaaaaaagctagtattgttatta	342380	1
EF0372	[TK] DNA-binding response regulator			EF0372-EF0373	EF0373	2	342321	2	PhoP	gtttataatttgtt	342418	1
EF0373	[T] sensor histidine kinase		2.7.3.-	EF0372-EF0373	EF0373	2	342321	2	Fis	tgtttataatttgttca	342417	1
EF0373	[T] sensor histidine kinase		2.7.3.-	EF0372-EF0373	EF0373	2	342321	2	LysR	aaaaaaaagctagtattgttatta	342380	1
EF0373	[T] sensor histidine kinase		2.7.3.-	EF0372-EF0373	EF0373	2	342321	2	PhoP	gtttataatttgtt	342418	1
EF0374	NoCOG			EF0374	EF0374	1	342508	5	Fis	tgtttataatttgttca	342417	1
EF0374	NoCOG			EF0374	EF0374	1	342508	5	LysR	aaaaaaaagctagtattgttatta	342380	1
EF0374	NoCOG			EF0374	EF0374	1	342508	5	PhoP	gtttataatttgtt	342418	1
EF0375	NoCOG			EF0375	EF0375	1	343670	5	LysR	aaaaaatagtttatagttgttttt	343557	1
EF0376	NoCOG			EF0376	EF0376	1	344854	5	ArgR	tgattattatttaata	344758	1
EF0376	NoCOG			EF0376	EF0376	1	344854	5	LysR	tataaataaattgttattagttat	344704	1
EF0392	NoCOG			EF0392	EF0392	1	363117	5	GalR-S	tgaaaccgatacc	362993	1					up
EF0394	[S] secreted antigen, putative			EF0394	EF0394	1	365868	5	LysR	atattttaaataaactttagaaat	365825	4
EF0406	[G] PTS system, IIBC component		2.7.1.69	EF0406-EF0408	EF0406	3	377290	3	GalR-S	tgtaaacggattc	377149	3						up
EF0407	[K] transcriptional regulator, putative			EF0406-EF0408	EF0406	3	377290	3	GalR-S	tgtaaacggattc	377149	3						up
EF0408	[G] PTS system, IIA component		2.7.1.69	EF0406-EF0408	EF0406	3	377290	3	GalR-S	tgtaaacggattc	377149	3						up
EF0415	[MG] hypothetical protein			EF0415	EF0415	1	387374	5	CRP-FNR	tcgtgaaataaataaaaaaa	387527	3
EF0415	[MG] hypothetical protein			EF0415	EF0415	1	387374	5	LysR	taaataacataaaaataacctttt	387461	3
EF0417	[M] hypothetical protein			EF0417	EF0417	1	387695	4	CRP-FNR	tcgtgaaataaataaaaaaa	387527	4						down
EF0417	[M] hypothetical protein			EF0417	EF0417	1	387695	4	LysR	taaataacataaaaataacctttt	387461	4						down
EF0440	[E] di-/tripeptide transporter			EF0440	EF0440	1	411170	3	ArgR	gaatatttattct	411350	5
EF0440	[E] di-/tripeptide transporter			EF0440	EF0440	1	411170	3	Fis	tgaataaataacaagca	411428	5
EF0441	NoCOG			EF0441	EF0441	1	411482	5	LysR	aaaatataagatttttttgtttaa	411444	1
EF0442	NoCOG			EF0442	EF0442	1	411489	5	ArgR	gaatatttattct	411350	1
EF0442	NoCOG			EF0442	EF0442	1	411489	5	Fis	tgaataaataacaagca	411428	1
EF0442	NoCOG			EF0442	EF0442	1	411489	5	LysR	aaaatataagatttttttgtttaa	411444	1
EF0444	NoCOG			EF0444	EF0444	1	413131	5	LysR	aaaatttgaaatagccatgttttt	413095	1
EF0445	[H] naphthoate synthase	menB	4.1.3.36	EF0445	EF0445	1	413203	4	LysR	aaaagagagaataaaaggtttttt	413050	5						up
EF0452	[I] AMP-binding family protein			EF0452	EF0452	1	423026	3	LysR	aaaatacaacgttaaatgttattt	423113	2
EF0453	[O] OsmC/Ohr family protein			EF0453	EF0453	1	423247	4	LysR	aaaatacaacgttaaatgttattt	423113	4						up
EF0455	NoCOG			EF0455-EF0461	EF0455	7	424632	5	LysR	aaaattatataagaaatgtaattt	424510	8
EF0456	NoCOG			EF0455-EF0461	EF0455	7	424632	5	LysR	aaaattatataagaaatgtaattt	424510	8
EF0457	NoCOG		2.7.1.69	EF0455-EF0461	EF0455	7	424632	5	LysR	aaaattatataagaaatgtaattt	424510	8
EF0458	[K] phosphosugar-binding transcriptional regulator, putative			EF0455-EF0461	EF0455	7	424632	5	LysR	aaaattatataagaaatgtaattt	424510	8
EF0459	[R] hypothetical protein			EF0455-EF0461	EF0455	7	424632	5	LysR	aaaattatataagaaatgtaattt	424510	8
EF0460	[V] hypothetical protein			EF0455-EF0461	EF0455	7	424632	5	LysR	aaaattatataagaaatgtaattt	424510	8
EF0461	[G] PTS system, IIA component		2.7.1.69	EF0455-EF0461	EF0455	7	424632	5	LysR	aaaattatataagaaatgtaattt	424510	8
EF0466	[G] glucosamine-6-phosphate isomerase	nagB	5.3.1.10	EF0466	EF0466	1	434221	3	LysR	gaaatagaagtttttttcttttat	434128	8						up
EF0468	NoCOG			EF0468-EF0469	EF0468	2	435878	5	LysR	aaaaataaatttctta	435887	7	up	up				down
EF0469	[R] hypothetical protein			EF0468-EF0469	EF0468	2	435878	5	LysR	aaaaataaatttctta	435887	7	up	up				down
EF0475	NoCOG	feoA		EF0475	EF0475-EF0477	1	442241	5	Fur	attgagaacgattctcattttcg	442188	3		up
EF0476	[P] ferrous iron transport protein B	feoB		EF0475	EF0475-EF0477	1	442711	5	Fur	attgagaacgattctcattttcg	442188	3		up
EF0477	NoCOG			EF0475	EF0475-EF0477	1	444868	5	Fur	attgagaacgattctcattttcg	442188	3		up
EF0481	NoCOG			EF0481-EF0482	EF0482	2	448221	1	LysR	aaaacaaaaaaatattctaatttt	448378	2
EF0482	[K] hypothetical protein			EF0481-EF0482	EF0482	2	448221	1	LysR	aaaacaaaaaaatattctaatttt	448378	2
EF0485	NoCOG			EF0485	EF0485	1	450206	5	DeoR	tgttaaattacta	450066	2
EF0485	NoCOG			EF0485	EF0485	1	450206	5	LysR	aatatatgttaaattactaatttt	450060	2
EF0488	NoCOG			EF0488-EF0498	EF0488	11	455095	5	Fis	tgtttgatttttaacca	454985	1
EF0489	NoCOG			EF0488-EF0498	EF0488	11	455095	5	Fis	tgtttgatttttaacca	454985	1
EF0490	NoCOG			EF0488-EF0498	EF0488	11	455095	5	Fis	tgtttgatttttaacca	454985	1
EF0491	[NU] hypothetical protein			EF0488-EF0498	EF0488	11	455095	5	Fis	tgtttgatttttaacca	454985	1
EF0492	NoCOG			EF0488-EF0498	EF0488	11	455095	5	Fis	tgtttgatttttaacca	454985	1
EF0493	NoCOG			EF0488-EF0498	EF0488	11	455095	5	Fis	tgtttgatttttaacca	454985	1
EF0494	NoCOG			EF0488-EF0498	EF0488	11	455095	5	Fis	tgtttgatttttaacca	454985	1
EF0495	NoCOG			EF0488-EF0498	EF0488	11	455095	5	Fis	tgtttgatttttaacca	454985	1
EF0496	NoCOG			EF0488-EF0498	EF0488	11	455095	5	Fis	tgtttgatttttaacca	454985	1
EF0497	NoCOG			EF0488-EF0498	EF0488	11	455095	5	Fis	tgtttgatttttaacca	454985	1
EF0498	NoCOG			EF0488-EF0498	EF0488	11	455095	5	Fis	tgtttgatttttaacca	454985	1
EF0500	[U] hypothetical protein			EF0500-EF0502	EF0500	3	462563	5	ArgR	atgatttataagtgaa	462458	1
EF0501	NoCOG			EF0500-EF0502	EF0500	3	462563	5	ArgR	atgatttataagtgaa	462458	1
EF0502	NoCOG			EF0500-EF0502	EF0500	3	462563	5	ArgR	atgatttataagtgaa	462458	1
EF0504	NoCOG			EF0504	EF0504	1	470185	5	CRP-FNR	taaggtgatagaagtaat	470273	1
EF0510	[L] single-strand binding protein	ssb-3		EF0510-EF0511	EF0510	2	473543	1	DnaA	ttatgcac	473419	1
EF0511	[L] thermonuclease precursor	nuc-1	3.1.31.1	EF0510-EF0511	EF0510	2	473543	1	DnaA	ttatgcac	473419	1
EF0516	[R] hypothetical protein			EF0516-EF0517	EF0517	2	479368	4	CRP-FNR	agtgaacattttcacatt	479400	4
EF0516	[R] hypothetical protein			EF0516-EF0517	EF0517	2	479368	4	PhoP	acttaatttataataa	479385	4
EF0517	[H] 2-dehydropantoate 2-reductase			EF0516-EF0517	EF0517	2	479368	4	CRP-FNR	agtgaacattttcacatt	479400	4
EF0517	[H] 2-dehydropantoate 2-reductase			EF0516-EF0517	EF0517	2	479368	4	PhoP	acttaatttataataa	479385	4
EF0519	NoCOG			EF0519	EF0519	1	479855	5	LysR	agataaaatacatgttttaagtttattca	479863	1
EF0521	[M] choloylglycine hydrolase family protein			EF0521	EF0521	1	482323	4	ArgR	tatatgaacattc	482419	7
EF0525	NoCOG			EF0525	EF0525	1	484620	5	LysR	ataaaaaaataaaaatagccattt	484480	1
EF0531	NoCOG			EF0531-EF0532	EF0531	2	491277	5	ArgR	taaataattatct	491174	1
EF0532	NoCOG			EF0531-EF0532	EF0531	2	491277	5	ArgR	taaataattatct	491174	1
EF0540	[G] N-acetylmannosamine-6-phosphate 2-epimerase			EF0540	EF0540	1	495845	3	LysR	taattaaataaatgtaattcataa	495668	8
EF0543	[S] hypothetical protein			EF0543	EF0543	1	500977	5	ArgR	ccataaatttata	501051	5						down
EF0544	[J] ribosomal protein L32	rpmF-1		EF0544-EF0546	EF0544	3	501328	5	ArgR	ccataaatttata	501051	8
EF0545	NoCOG			EF0544-EF0546	EF0544	3	501328	5	ArgR	ccataaatttata	501051	8
EF0546	[S] hypothetical protein			EF0544-EF0546	EF0544	3	501328	5	ArgR	ccataaatttata	501051	8
EF0547	NoCOG			EF0547	EF0547	1	502550	5	LysR	aaataacatttataaatgttatat	502482	4						down
EF0548	[R] hypothetical protein			EF0548	EF0548	1	503723	5	LysR	aaaaaatagtaaatgattgttatt	503580	2
EF0559	[R] polysaccharide biosynthesis family protein			EF0559	EF0559	1	518671	5	ArgR	ttataaaaattaa	518744	1	up
EF0559	[R] polysaccharide biosynthesis family protein			EF0559	EF0559	1	518671	5	LysR	aataaaacggaataaaatctaatt	518781	1	up
EF0562	NoCOG			EF0562	EF0562	1	520795	5	GalR-S	tgaaaccgaattc	520770	1
EF0563	NoCOG			EF0563-EF0564	EF0563	2	521552	5	GalR-S	tgtaatctcttac	521462	1
EF0564	NoCOG			EF0563-EF0564	EF0563	2	521552	5	GalR-S	tgtaatctcttac	521462	1
EF0574	NoCOG			EF0574	EF0574	1	537292	5	LysR	aaaaaattatctaatctaaattat	537196	1
EF0590	NoCOG			EF0590	EF0590	1	549976	5	LysR	aaaattatctataaattatttttt	549895	4
EF0594	NoCOG			EF0594	EF0594	1	559056	5	ArgR	ttcttatttttgcaaa	558960	1
EF0599	NoCOG			EF0599	EF0599	1	562902	5	LysR	agtatactaaaatatgctatattt	562834	1
EF0616	[E] ornithine cyclodeaminase			EF0616-EF0618	EF0618	3	578361	5	ArgR	tgaatatttgtgaaaa	578506	3
EF0616	[E] ornithine cyclodeaminase			EF0616-EF0618	EF0618	3	578361	5	LysR	aatactaaaacttagttattcttt	578522	3
EF0617	NoCOG			EF0616-EF0618	EF0618	3	578361	5	ArgR	tgaatatttgtgaaaa	578506	3
EF0617	NoCOG			EF0616-EF0618	EF0618	3	578361	5	LysR	aatactaaaacttagttattcttt	578522	3
EF0618	[K] hypothetical protein			EF0616-EF0618	EF0618	3	578361	5	ArgR	tgaatatttgtgaaaa	578506	3
EF0618	[K] hypothetical protein			EF0616-EF0618	EF0618	3	578361	5	LysR	aatactaaaacttagttattcttt	578522	3
EF0628	[G] PTS system, IIA component, putative			EF0628	EF0628	1	582370	3	CRP-FNR	attagtgagtatggtcaa	582281	5
EF0628	[G] PTS system, IIA component, putative			EF0628	EF0628	1	582370	3	LysR	aaaaattttatatttttgttatat	582229	5
EF0638	NoCOG			EF0638	EF0638	1	595780	5	CRP-FNR	ttatttagtaatatcact	595919	1
EF0638	NoCOG			EF0638	EF0638	1	595780	5	LysR	aatgaagaggcaagttttttattt	595901	1
EF0644	[K] transcriptional regulator, LysR family			EF0644	EF0644	1	599340	1	LysR	aaatataaatatttcatttagtat	599399	1						up
EF0645	[P] exfoliative toxin A, putative			EF0645-EF0646	EF0645	2	599482	3	LysR	aaatataaatatttcatttagtat	599399	4
EF0646	[MG] NAD-dependent epimerase/dehydratase family protein			EF0645-EF0646	EF0645	2	599482	3	LysR	aaatataaatatttcatttagtat	599399	4
EF0653	NoCOG			EF0653-EF0654	EF0653	2	605289	1	GalR-S	tgtaacagtttcc	605145	5						up
EF0654	[K] sugar-binding transcriptional regulator, LacI family			EF0653-EF0654	EF0653	2	605289	1	GalR-S	tgtaacagtttcc	605145	5						up
EF0657	[KG] transcriptional regulator, DeoR family			EF0657-EF0658	EF0657	2	608293	3	ArgR	tgcattgttttgcatt	608223	4						up
EF0658	[E] hypothetical protein			EF0657-EF0658	EF0657	2	608293	3	ArgR	tgcattgttttgcatt	608223	4						up
EF0660	[V] MATE efflux family protein			EF0660	EF0660	1	611380	4	LysR	aaaataaaaggatggttgttttt	611213	3
EF0664	NoCOG			EF0664	EF0664	1	616120	5	GalR-S	tgaaagcggatac	616104	1
EF0692	[K] phosphosugar-binding transcriptional regulator, RpiR family, putative			EF0692	EF0692	1	646915	1	ArgR	gactatttataca	647096	3
EF0692	[K] phosphosugar-binding transcriptional regulator, RpiR family, putative			EF0692	EF0692	1	646915	1	GalR-S	tgtaaatgttttc	647006	3
EF0692	[K] phosphosugar-binding transcriptional regulator, RpiR family, putative			EF0692	EF0692	1	646915	1	LysR	aaaaaaacatttataagcctattt	646942	3
EF0693	[G] 1-phosphofructokinase	fruK-1	2.7.1.56	EF0693-EF0696	EF0693	4	647094	3	ArgR	gactatttataca	647096	3
EF0693	[G] 1-phosphofructokinase	fruK-1	2.7.1.56	EF0693-EF0696	EF0693	4	647094	3	GalR-S	tgtaaatgttttc	647006	3
EF0693	[G] 1-phosphofructokinase	fruK-1	2.7.1.56	EF0693-EF0696	EF0693	4	647094	3	LysR	aaaaaaacatttataagcctattt	646942	3
EF0694	[G] PTS system, fructose-specific family, IIBC components			EF0693-EF0696	EF0693	4	647094	3	ArgR	gactatttataca	647096	3
EF0694	[G] PTS system, fructose-specific family, IIBC components			EF0693-EF0696	EF0693	4	647094	3	GalR-S	tgtaaatgttttc	647006	3
EF0694	[G] PTS system, fructose-specific family, IIBC components			EF0693-EF0696	EF0693	4	647094	3	LysR	aaaaaaacatttataagcctattt	646942	3
EF0695	[GT] PTS system, IIA component		2.7.1.69	EF0693-EF0696	EF0693	4	647094	3	ArgR	gactatttataca	647096	3
EF0695	[GT] PTS system, IIA component		2.7.1.69	EF0693-EF0696	EF0693	4	647094	3	GalR-S	tgtaaatgttttc	647006	3
EF0695	[GT] PTS system, IIA component		2.7.1.69	EF0693-EF0696	EF0693	4	647094	3	LysR	aaaaaaacatttataagcctattt	646942	3
EF0696	[G] tagatose 1,6-diphosphate aldolase	lacD-1	4.1.2.40	EF0693-EF0696	EF0693	4	647094	3	ArgR	gactatttataca	647096	3
EF0696	[G] tagatose 1,6-diphosphate aldolase	lacD-1	4.1.2.40	EF0693-EF0696	EF0693	4	647094	3	GalR-S	tgtaaatgttttc	647006	3
EF0696	[G] tagatose 1,6-diphosphate aldolase	lacD-1	4.1.2.40	EF0693-EF0696	EF0693	4	647094	3	LysR	aaaaaaacatttataagcctattt	646942	3
EF0699	[R] hypothetical protein			EF0699	EF0699	1	652292	5	ArgR	gaataaaaataaa	652267	5
EF0701	[J] peptide chain release factor 3	prfC		EF0701	EF0701	1	655165	1	ArgR	aaataaataaata	655125	8
EF0705	NoCOG			EF0705	EF0705	1	659515	5	CRP-FNR	aaaaagtgaaaagcataaaa	659649	4
EF0705	NoCOG			EF0705	EF0705	1	659515	5	CRP-FNR	tttttgatgaaaataaaa	659635	4
EF0706	[O] ATP-dependent Clp protease, ATP-binding subunit ClpE	clpE		EF0706	EF0706	1	661961	4	LysR	aaaaaaggcaaagattcgattttt	662157	8						up
EF0708	NoCOG			EF0708	EF0708	1	662251	5	LysR	aaaaaaggcaaagattcgattttt	662157	1						up
EF0714	NoCOG			EF0714	EF0714	1	668849	5	ArgR	gtgtaaatattaa	668896	3		up
EF0721	[L] ATP-dependent DNA helicase PcrA	pcrA	3.6.1.-	EF0721-EF0722	EF0721	2	676773	1	LysR	aagaaaaagattttttgttctttt	676683	8		up				down
EF0722	[L] DNA ligase, NAD-dependent	ligA	6.5.1.2	EF0721-EF0722	EF0721	2	676773	1	LysR	aagaaaaagattttttgttctttt	676683	8		up				down
EF0728	[J] RNA methyltransferase, TrmA family			EF0728	EF0728	1	686280	1	ArgR	tgaaaaattatcc	686281	8
EF0732	[E] ornithine carbamoyltransferase	argF-2	2.1.3.3	EF0732-EF0734	EF0732	3	689526	3	ArgR	tgaatgatttttc	689280	3
EF0732	[E] ornithine carbamoyltransferase	argF-2	2.1.3.3	EF0732-EF0734	EF0732	3	689526	3	PurR	aagaaagcgttttcta	689429	3
EF0733	[E] amino acid permease family protein			EF0732-EF0734	EF0732	3	689526	3	ArgR	tgaatgatttttc	689280	3
EF0733	[E] amino acid permease family protein			EF0732-EF0734	EF0732	3	689526	3	PurR	aagaaagcgttttcta	689429	3
EF0734	[E] hypothetical protein			EF0732-EF0734	EF0732	3	689526	3	ArgR	tgaatgatttttc	689280	3
EF0734	[E] hypothetical protein			EF0732-EF0734	EF0732	3	689526	3	PurR	aagaaagcgttttcta	689429	3
EF0742	NoCOG			EF0742	EF0742	1	698603	5	FruR	gttgaagcgtatcac	698630	5
EF0746	[V] penicillin-binding protein, putative			EF0746	EF0746	1	701726	4	LysR	ataaaagttgaaagttttataaattttac	701626	4						down
EF0747	[S] hypothetical protein			EF0747	EF0747	1	702992	5	ArgR	aaattttaaagca	702884	3		up
EF0750	NoCOG			EF0750-EF0754	EF0750	5	705465	5	LysR	aaaatctaataaatatttctttta	705385	4						down
EF0751	NoCOG			EF0750-EF0754	EF0750	5	705465	5	LysR	aaaatctaataaatatttctttta	705385	4						down
EF0752	NoCOG			EF0750-EF0754	EF0750	5	705465	5	LysR	aaaatctaataaatatttctttta	705385	4						down
EF0753	NoCOG			EF0750-EF0754	EF0750	5	705465	5	LysR	aaaatctaataaatatttctttta	705385	4						down
EF0754	NoCOG			EF0750-EF0754	EF0750	5	705465	5	LysR	aaaatctaataaatatttctttta	705385	4						down
EF0755	NoCOG			EF0755	EF0755	1	710288	5	LysR	aaaaaacaacgatttctttttttt	710297	5
EF0758	[P] cadmium-translocating P-type ATPase			EF0758-EF0759	EF0758	2	713595	2	ArgR	gaatatatattca	713545	7		down			down	down
EF0759	[S] sapB protein, putative			EF0758-EF0759	EF0758	2	713595	2	ArgR	gaatatatattca	713545	7		down			down	down
EF0760	[E] amino acid ABC transporter, ATP-binding protein			EF0760-EF0761	EF0761	2	719209	3	LexA	gaaaatatgttc	719392	7		down				up
EF0760	[E] amino acid ABC transporter, ATP-binding protein			EF0760-EF0761	EF0761	2	719209	3	LysR	aaaaaactctaatttccttacatt	719292	7		down				up
EF0761	[E] amino acid ABC transporter, amino acid-binding/permease protein			EF0760-EF0761	EF0761	2	719209	3	LexA	gaaaatatgttc	719392	7		down				up
EF0761	[E] amino acid ABC transporter, amino acid-binding/permease protein			EF0760-EF0761	EF0761	2	719209	3	LysR	aaaaaactctaatttccttacatt	719292	7		down				up
EF0762	[L] excinuclease ABC subunit B	uvrB		EF0762-EF0763	EF0762	2	719488	1	LexA	gaaaatatgttc	719392	8						up
EF0762	[L] excinuclease ABC subunit B	uvrB		EF0762-EF0763	EF0762	2	719488	1	LysR	aaaaaactctaatttccttacatt	719292	8						up
EF0763	[L] excinuclease ABC, subunit A	uvrA		EF0762-EF0763	EF0762	2	719488	1	LexA	gaaaatatgttc	719392	8						up
EF0763	[L] excinuclease ABC, subunit A	uvrA		EF0762-EF0763	EF0762	2	719488	1	LysR	aaaaaactctaatttccttacatt	719292	8						up
EF0764	NoCOG			EF0764	EF0764	1	724593	5	ArgR	taataaaaattaa	724497	1
EF0764	NoCOG			EF0764	EF0764	1	724593	5	CRP-FNR	ttgttaacaaaataacaatg	724553	1
EF0764	NoCOG			EF0764	EF0764	1	724593	5	CRP-FNR	tttttaataaaaattaaa	724493	1
EF0764	NoCOG			EF0764	EF0764	1	724593	5	LysR	aaaattaaaaataaatgttgactt	724502	1
EF0775	NoCOG			EF0775-EF0776	EF0775	2	732434	5	DnaA	ttatcgac	732458	1
EF0776	NoCOG			EF0775-EF0776	EF0775	2	732434	5	DnaA	ttatcgac	732458	1
EF0778	NoCOG			EF0778-EF0780	EF0778	3	735904	5	ArgR	tgaatttgttttcatt	735868	6		down			down	down
EF0779	[C] glycerophosphoryl diester phosphodiesterase family protein			EF0778-EF0780	EF0778	3	735904	5	ArgR	tgaatttgttttcatt	735868	6		down			down	down
EF0780	[LR] MutT/nudix family protein			EF0778-EF0780	EF0778	3	735904	5	ArgR	tgaatttgttttcatt	735868	6		down			down	down
EF0792	NoCOG			EF0792-EF0793	EF0792	2	752797	4	ArgR	aaataattattga	752726	8
EF0792	NoCOG			EF0792-EF0793	EF0792	2	752797	4	LysR	ttgaaaaacagacttctctatttt	752677	8
EF0793	[V] ABC transporter, ATP-binding protein			EF0792-EF0793	EF0792	2	752797	4	ArgR	aaataattattga	752726	8
EF0793	[V] ABC transporter, ATP-binding protein			EF0792-EF0793	EF0792	2	752797	4	LysR	ttgaaaaacagacttctctatttt	752677	8
EF0797	NoCOG			EF0797-EF0798	EF0798	2	758659	5	ArgR	tgcttttaaataaatt	758612	3	up	up			down	up
EF0798	[S] hypothetical protein			EF0797-EF0798	EF0798	2	758659	5	ArgR	tgcttttaaataaatt	758612	3	up	up			down	up
EF0810	[S] hypothetical protein			EF0810-EF0811	EF0810	2	770351	5	LysR	aaaataaagaaaaaattaatatgt	770209	1
EF0811	NoCOG			EF0810-EF0811	EF0810	2	770351	5	LysR	aaaataaagaaaaaattaatatgt	770209	1
EF0819	NoCOG			EF0819	EF0819	1	783283	5	LysR	taaaaaaaagaaattgtttcgtt	783331	3
EF0834	[G] PTS system, IIC component			EF0834	EF0834	1	793924	3	LysR	ataaatgcgaaataattattattt	793873	3						down
EF0847	NoCOG			EF0847	EF0847	1	807045	5	ArgR	acttttataaaaa	807161	1
EF0847	NoCOG			EF0847	EF0847	1	807045	5	LysR	tataaaaattcagaaaaattttat	807166	1
EF0848	[I] holo-(acyl-carrier-protein) synthase	acpS	2.7.8.7	EF0848-EF0850	EF0848	3	807350	3	ArgR	acttttataaaaa	807161	8		up				up
EF0848	[I] holo-(acyl-carrier-protein) synthase	acpS	2.7.8.7	EF0848-EF0850	EF0848	3	807350	3	LysR	tataaaaattcagaaaaattttat	807166	8		up				up
EF0849	[M] alanine racemase	alr	5.1.1.1	EF0848-EF0850	EF0848	3	807350	3	ArgR	acttttataaaaa	807161	8		up				up
EF0849	[M] alanine racemase	alr	5.1.1.1	EF0848-EF0850	EF0848	3	807350	3	LysR	tataaaaattcagaaaaattttat	807166	8		up				up
EF0850	[T] transcriptional regulator, PemK family			EF0848-EF0850	EF0848	3	807350	3	ArgR	acttttataaaaa	807161	8		up				up
EF0850	[T] transcriptional regulator, PemK family			EF0848-EF0850	EF0848	3	807350	3	LysR	tataaaaattcagaaaaattttat	807166	8		up				up
EF0851	NoCOG			EF0851-EF0853	EF0851	3	809561	5	LysR	aaaattaaaatataaatataaaat	809386	1
EF0852	NoCOG			EF0851-EF0853	EF0851	3	809561	5	LysR	aaaattaaaatataaatataaaat	809386	1
EF0853	NoCOG			EF0851-EF0853	EF0851	3	809561	5	LysR	aaaattaaaatataaatataaaat	809386	1
EF0856	[T] aldo/keto reductase family protein			EF0856	EF0856	1	814397	2	LysR	aataaaaagaaaaaacaaagtatt	814332	5
EF0859	[P] cation efflux family protein			EF0859	EF0859	1	818466	2	LysR	tataaaaaggttttatagtatttt	818409	5						up
EF0860	[E] hypothetical protein			EF0860	EF0860	1	819933	3	LysR	ttaaaaaaagatggtgattttttt	819787	3						down
EF0872	[P] potassium uptake protein			EF0872	EF0872	1	832915	2	MalI	aaaacgtatt	832759	6		up
EF0875	[P] copper-translocating P-type ATPase		3.6.3.4	EF0875	EF0875	1	835853	2	LysR	aaaagtaattatttctaacaattt	835778	5						down
EF0884	NoCOG			EF0884-EF0890	EF0884	7	848093	5	LysR	aatgaagagaaaactttggatttt	847999	5						up
EF0885	NoCOG			EF0884-EF0890	EF0884	7	848093	5	LysR	aatgaagagaaaactttggatttt	847999	5						up
EF0886	NoCOG			EF0884-EF0890	EF0884	7	848093	5	LysR	aatgaagagaaaactttggatttt	847999	5						up
EF0887	[M] glycosyl transferase, group 2 family protein			EF0884-EF0890	EF0884	7	848093	5	LysR	aatgaagagaaaactttggatttt	847999	5						up
EF0888	NoCOG			EF0884-EF0890	EF0884	7	848093	5	LysR	aatgaagagaaaactttggatttt	847999	5						up
EF0889	NoCOG			EF0884-EF0890	EF0884	7	848093	5	LysR	aatgaagagaaaactttggatttt	847999	5						up
EF0890	NoCOG			EF0884-EF0890	EF0884	7	848093	5	LysR	aatgaagagaaaactttggatttt	847999	5						up
EF0895	[C] glycerol dehydrogenase, putative			EF0895	EF0895	1	860375	3	ArgR	gtataaaaattta	860243	4
EF0900	[C] aldehyde-alcohol dehydrogenase	adhE		EF0900	EF0900	1	864152	3	CRP-FNR	atgtgaaatagttaacaa	864048	7		up			up	down
EF0900	[C] aldehyde-alcohol dehydrogenase	adhE		EF0900	EF0900	1	864152	3	CRP-FNR	atgtgaaatagttaacaa	864048	7		up			up	down
EF0901	[C] isopentenyl pyrophosphate isomerase			EF0901-EF0904	EF0904	4	870818	3	ArgR	ttttttatattca	870805	8						down
EF0902	[I] phosphomevalonate kinase		2.7.4.2	EF0901-EF0904	EF0904	4	870818	3	ArgR	ttttttatattca	870805	8						down
EF0903	[I] mevalonate diphosphate decarboxylase	mvaD	4.1.1.33	EF0901-EF0904	EF0904	4	870818	3	ArgR	ttttttatattca	870805	8						down
EF0904	[I] mevalonate kinase	mvk	2.7.1.36	EF0901-EF0904	EF0904	4	870818	3	ArgR	ttttttatattca	870805	8						down
EF0905	[S] pentapeptide repeat family protein			EF0905-EF0906	EF0906	2	872793	5	ArgR	aaataattattaa	872974	3
EF0905	[S] pentapeptide repeat family protein			EF0905-EF0906	EF0906	2	872793	5	LysR	aaaaattaaaaaaagttaacattt	872902	3
EF0906	[S] hypothetical protein			EF0905-EF0906	EF0906	2	872793	5	ArgR	aaataattattaa	872974	3
EF0906	[S] hypothetical protein			EF0905-EF0906	EF0906	2	872793	5	LysR	aaaaattaaaaaaagttaacattt	872902	3
EF0907	[E] peptide ABC transporter, peptide-binding protein			EF0907	EF0907	1	873037	3	ArgR	aaataattattaa	872974	8					down	down
EF0907	[E] peptide ABC transporter, peptide-binding protein			EF0907	EF0907	1	873037	3	LysR	aaaaattaaaaaaagttaacattt	872902	8					down	down
EF0922	NoCOG			EF0922	EF0922	1	886407	5	LysR	aaaaatctctctttcttgttcatt	886411	8
EF0923	[K] transcriptional regulator, LysR family			EF0923	EF0923	1	886520	1	LysR	aaaaatctctctttcttgttcatt	886411	4
EF0924	[S] hypothetical protein			EF0924	EF0924	1	887415	5	ArgR	gaataaatactaa	887338	2
EF0924	[S] hypothetical protein			EF0924	EF0924	1	887415	5	Fis	tgcctaaattttcacca	887416	2
EF0929	[E] amino acid permease family protein			EF0929	EF0929	1	891639	3	LysR	aaatcaaaaaaagaaatgttttat	891512	6
EF0937	NoCOG			EF0937	EF0937	1	901129	5	LysR	taaaaaagaactttctgttattta	900999	4
EF0937	NoCOG			EF0937	EF0937	1	901129	5	MalI	aaaacgttta	901146	4
EF0939	NoCOG	mgsA	4.2.99.11	EF0939	EF0939	1	903085	5	ArgR	tgatttgttactcata	902923	1						up
EF0943	NoCOG			EF0943	EF0943	1	907963	5	ArgR	tttttatttattcctt	908012	3
EF0953	NoCOG			EF0953	EF0953	1	915641	5	ArgR	tgattaattattggtt	915465	1
EF0955	[G] aldose 1-epimerase, putative			EF0955-EF0957	EF0957	3	920910	3	PurR	cgaaaccgattgc	921162	5		up
EF0956	[R] beta-phosphoglucomutase	pgmB	5.4.2.6	EF0955-EF0957	EF0957	3	920910	3	PurR	cgaaaccgattgc	921162	5		up
EF0957	[G] glycosyl hydrolase, family 65			EF0955-EF0957	EF0957	3	920910	3	PurR	cgaaaccgattgc	921162	5		up
EF0958	[G] PTS system, IIABC components		2.7.1.69	EF0958	EF0958	1	921191	3	PurR	cgaaaccgattgc	921162	8
EF0967	[R] hypothetical protein			EF0967	EF0967	1	928993	5	LysR	ttaagaaaataaatttttaataca	928898	1
EF0972	[R] DNA repair exonuclease family protein			EF0972	EF0972	1	933838	5	LysR	aaaaaataaggaaaggttaaatt	933888	1	up	up
EF0972	[R] DNA repair exonuclease family protein			EF0972	EF0972	1	933838	5	PhoP	ttaaattttcagtaaa	933904	1	up	up
EF0973	[E] proline dipeptidase	pepQ-1	3.4.13.9	EF0973-EF0974	EF0973	2	934010	3	LysR	aaaaaataaggaaaggttaaatt	933888	6
EF0973	[E] proline dipeptidase	pepQ-1	3.4.13.9	EF0973-EF0974	EF0973	2	934010	3	PhoP	ttaaattttcagtaaa	933904	6
EF0974	[R] hypothetical protein			EF0973-EF0974	EF0973	2	934010	3	LysR	aaaaaataaggaaaggttaaatt	933888	6
EF0974	[R] hypothetical protein			EF0973-EF0974	EF0973	2	934010	3	PhoP	ttaaattttcagtaaa	933904	6
EF0987	NoCOG			EF0987	EF0987	1	944622	5	ArgR	aaataattaatca	944355	2					up
EF0988	[S] hypothetical protein			EF0988-EF1002	EF0988	1	945302	4	CRP-FNR	ttgggtgatgcttgttac	945153	8
EF0988	[S] hypothetical protein			EF0988-EF1002	EF0988	1	945302	4	LysR	aaaaatagaagtttttagatttat	945213	8
EF0989	NoCOG			EF0988-EF1002	EF0988	1	945302	4	CRP-FNR	ttgggtgatgcttgttac	945153	8
EF0989	NoCOG			EF0988-EF1002	EF0988	1	945302	4	LysR	aaaaatagaagtttttagatttat	945213	8
EF0990	NoCOG			EF0988-EF1002	EF0988	1	945302	4	CRP-FNR	ttgggtgatgcttgttac	945153	8
EF0990	NoCOG			EF0988-EF1002	EF0988	1	945302	4	LysR	aaaaatagaagtttttagatttat	945213	8
EF0991	[M] penicillin-binding protein C	pbpC		EF0988-EF1002	EF0988	1	945302	4	CRP-FNR	ttgggtgatgcttgttac	945153	8
EF0991	[M] penicillin-binding protein C	pbpC		EF0988-EF1002	EF0988	1	945302	4	LysR	aaaaatagaagtttttagatttat	945213	8
EF0992	[M] phospho-N-acetylmuramoyl-pentapeptide-transferase	mraY	2.7.8.13	EF0988-EF1002	EF0988	1	945302	4	CRP-FNR	ttgggtgatgcttgttac	945153	8
EF0992	[M] phospho-N-acetylmuramoyl-pentapeptide-transferase	mraY	2.7.8.13	EF0988-EF1002	EF0988	1	945302	4	LysR	aaaaatagaagtttttagatttat	945213	8
EF0993	[M] UDP-N-acetylmuramoyl-L-alanyl-D-glutamatesynthetase	murD	6.3.2.9	EF0988-EF1002	EF0988	1	945302	4	CRP-FNR	ttgggtgatgcttgttac	945153	8
EF0993	[M] UDP-N-acetylmuramoyl-L-alanyl-D-glutamatesynthetase	murD	6.3.2.9	EF0988-EF1002	EF0988	1	945302	4	LysR	aaaaatagaagtttttagatttat	945213	8
EF0994	[M] N-acetylglucosaminyl transferase	murG	2.4.1.-	EF0988-EF1002	EF0988	1	945302	4	CRP-FNR	ttgggtgatgcttgttac	945153	8
EF0994	[M] N-acetylglucosaminyl transferase	murG	2.4.1.-	EF0988-EF1002	EF0988	1	945302	4	LysR	aaaaatagaagtttttagatttat	945213	8
EF0995	[M] cell division protein FtsQ	ftsQ		EF0988-EF1002	EF0988	1	945302	4	CRP-FNR	ttgggtgatgcttgttac	945153	8
EF0995	[M] cell division protein FtsQ	ftsQ		EF0988-EF1002	EF0988	1	945302	4	LysR	aaaaatagaagtttttagatttat	945213	8
EF0996	[D] cell division protein FtsA	ftsA		EF0988-EF1002	EF0988	1	945302	4	CRP-FNR	ttgggtgatgcttgttac	945153	8
EF0996	[D] cell division protein FtsA	ftsA		EF0988-EF1002	EF0988	1	945302	4	LysR	aaaaatagaagtttttagatttat	945213	8
EF0997	[D] cell division protein FtsZ	ftsZ		EF0988-EF1002	EF0988	1	945302	4	CRP-FNR	ttgggtgatgcttgttac	945153	8
EF0997	[D] cell division protein FtsZ	ftsZ		EF0988-EF1002	EF0988	1	945302	4	LysR	aaaaatagaagtttttagatttat	945213	8
EF0998	[R] conserved hypothetical protein TIGR00044			EF0988-EF1002	EF0988	1	945302	4	CRP-FNR	ttgggtgatgcttgttac	945153	8
EF0998	[R] conserved hypothetical protein TIGR00044			EF0988-EF1002	EF0988	1	945302	4	LysR	aaaaatagaagtttttagatttat	945213	8
EF0999	[S] hypothetical protein			EF0988-EF1002	EF0988	1	945302	4	CRP-FNR	ttgggtgatgcttgttac	945153	8
EF0999	[S] hypothetical protein			EF0988-EF1002	EF0988	1	945302	4	LysR	aaaaatagaagtttttagatttat	945213	8
EF1000	[S] hypothetical protein			EF0988-EF1002	EF0988	1	945302	4	CRP-FNR	ttgggtgatgcttgttac	945153	8
EF1000	[S] hypothetical protein			EF0988-EF1002	EF0988	1	945302	4	LysR	aaaaatagaagtttttagatttat	945213	8
EF1001	[S] S4 domain protein			EF0988-EF1002	EF0988	1	945302	4	CRP-FNR	ttgggtgatgcttgttac	945153	8
EF1001	[S] S4 domain protein			EF0988-EF1002	EF0988	1	945302	4	LysR	aaaaatagaagtttttagatttat	945213	8
EF1002	[D] cell division protein DivIVA	divIVA		EF0988-EF1002	EF0988	1	945302	4	CRP-FNR	ttgggtgatgcttgttac	945153	8
EF1002	[D] cell division protein DivIVA	divIVA		EF0988-EF1002	EF0988	1	945302	4	LysR	aaaaatagaagtttttagatttat	945213	8
EF1022	NoCOG			EF1022	EF1022	1	980154	5	LysR	taaaaatgtaaaaagaattatttt	980112	1						down
EF1037	[E] aspartate aminotransferase			EF1037	EF1037	1	998223	3	LysR	aaaagaaacaatcctttatttttt	998071	1
EF1038	NoCOG			EF1038	EF1038	1	999976	5	ArgR	taaacaaaaacgc	999869	1		up
EF1038	NoCOG			EF1038	EF1038	1	999976	5	PhoP	gtttattatttatt	999877	1
EF1057	[P] Mn2+/Fe2+ transporter, NRAMP family			EF1057-EF1058	EF1057	2	1028878	2	ArgR	tgattgaatatgcaaa	1028921	6	down	down			up	down
EF1058	[T] universal stress protein family			EF1057-EF1058	EF1057	2	1028878	2	ArgR	tgattgaatatgcaaa	1028921	6	down	down			up	down
EF1059	[TQ] hypothetical protein			EF1059	EF1059	1	1032626	2	CRP-FNR	ttgagactcttatcagat	1032913	1
EF1059	[TQ] hypothetical protein			EF1059	EF1059	1	1032626	2	PhoP	gaattatctaaaaatt	1032648	1
EF1060	[E] pheromone binding protein			EF1060-EF1062	EF1060	3	1033007	3	CRP-FNR	ttgagactcttatcagat	1032913	3
EF1061	[FR] cytosine deaminase			EF1060-EF1062	EF1060	3	1033007	3	CRP-FNR	ttgagactcttatcagat	1032913	3
EF1062	[FR] cytosine deaminase			EF1060-EF1062	EF1060	3	1033007	3	CRP-FNR	ttgagactcttatcagat	1032913	3
EF1078	NoCOG			EF1078	EF1078	1	1048290	5	LysR	tttttttaaaggaaattgttatt	1048113	3
EF1080	[L] ImpB/MucB/SamB family protein			EF1080-EF1081	EF1080	2	1050218	1	LexA	gaacgtttgttc	1050175	5						down
EF1081	NoCOG			EF1080-EF1081	EF1080	2	1050218	1	LexA	gaacgtttgttc	1050175	5						down
EF1085	NoCOG			EF1085	EF1085	1	1053075	5	ArgR	cagcatttttattcac	1053109	1
EF1090	NoCOG			EF1090	EF1090	1	1057059	5	ArgR	taactgttaattc	1057231	1
EF1091	[M] von Willebrand factor type A domain protein			EF1091-EF1094	EF1091	4	1057387	4	ArgR	taactgttaattc	1057231	4						down
EF1092	[M] cell wall surface anchor family protein			EF1091-EF1094	EF1091	4	1057387	4	ArgR	taactgttaattc	1057231	4						down
EF1093	[M] cell wall surface anchor family protein			EF1091-EF1094	EF1091	4	1057387	4	ArgR	taactgttaattc	1057231	4						down
EF1094	[M] sortase family protein			EF1091-EF1094	EF1091	4	1057387	4	ArgR	taactgttaattc	1057231	4						down
EF1098	NoCOG			EF1098	EF1098	1	1067701	5	ArgR	gtatttttattca	1067777	2
EF1099	[M] collagen adhesin protein			EF1099	EF1099	1	1068036	4	ArgR	gtatttttattca	1067777	1
EF1103	[E] amino acid permease family protein			EF1103	EF1103	1	1074445	3	CRP-FNR	aaaaattgagcgattttaatcact	1074590	2
EF1103	[E] amino acid permease family protein			EF1103	EF1103	1	1074445	3	LysR	aaaaaataatatgaaaataacttt	1074466	2
EF1105	NoCOG			EF1105	EF1105	1	1075593	5	CRP-FNR	tttttgtgtgaaaatgcaca	1075714	1
EF1111	[U] signal peptidase I			EF1111	EF1111	1	1079124	4	CRP-FNR	ttttatgagcaggatcaa	1078954	8
EF1111	[U] signal peptidase I			EF1111	EF1111	1	1079124	4	LysR	caaatttgaaagaaatacgttttt	1078984	8
EF1135	[M] hypothetical protein			EF1135	EF1135	1	1107886	4	LysR	aaataaataatatattttataatt	1108010	8
EF1137	NoCOG			EF1137	EF1137	1	1108144	5	LysR	aaataaataatatattttataatt	1108010	1						up
EF1145	[S] hypothetical protein			EF1145	EF1145	1	1114614	5	FruR	ctgtatcgattcaac	1114636	3						up
EF1154	[L] DNA replication protein DnaD, putative			EF1154-EF1155	EF1154	2	1125276	1	CRP-FNR	tttgatgtttatcaagtg	1125220	8
EF1155	[L] endonuclease III	nth	4.2.99.18	EF1154-EF1155	EF1154	2	1125276	1	CRP-FNR	tttgatgtttatcaagtg	1125220	8
EF1158	NoCOG			EF1158-EF1161	EF1158	4	1129087	3	ArgR	tgtataaaatttcatt	1128964	1
EF1159	[G] PTS system, cellobiose-specific IIB component		2.7.1.69	EF1159-EF1161	EF1159	3	1130030	3	LysR	gtaaaaaacaaatttatctttttt	1130034	5
EF1160	[G] PTS system, cellobiose-specific IIC component			EF1159-EF1161	EF1159	3	1130030	3	LysR	gtaaaaaacaaatttatctttttt	1130034	5
EF1161	NoCOG			EF1159-EF1161	EF1159	3	1130030	3	LysR	gtaaaaaacaaatttatctttttt	1130034	5
EF1162	[KL] helicase, putative			EF1162-EF1164	EF1162	3	1132387	1	LexA	gaatgtatgttc	1132345	8
EF1163	NoCOG			EF1162-EF1164	EF1162	3	1132387	1	LexA	gaatgtatgttc	1132345	8
EF1164	[R] HD domain protein			EF1162-EF1164	EF1162	3	1132387	1	LexA	gaatgtatgttc	1132345	8
EF1183	[E] aspartate-semialdehyde dehydrogenase	asd	1.2.1.11	EF1183-EF1185	EF1183	3	1149948	3	CRP-FNR	ttgtgatctaattcaaaa	1149707	8
EF1184	[EM] dihydrodipicolinate synthase	dapA	4.2.1.52	EF1183-EF1185	EF1183	3	1149948	3	CRP-FNR	ttgtgatctaattcaaaa	1149707	8
EF1185	[R] metallo-beta-lactamase superfamily protein			EF1183-EF1185	EF1183	3	1149948	3	CRP-FNR	ttgtgatctaattcaaaa	1149707	8
EF1190	NoCOG			EF1190-EF1191	EF1190	2	1157355	5	ArgR	ttcttttttattcaat	1157265	6	down
EF1191	[S] DegV family protein			EF1190-EF1191	EF1190	2	1157355	5	ArgR	ttcttttttattcaat	1157265	6	down
EF1206	[C] malate dehydrogenase, decarboxylating		1.1.1.39	EF1206-EF1207	EF1207	2	1174067	3	ArgR	taatctatattca	1174088	5						up
EF1206	[C] malate dehydrogenase, decarboxylating		1.1.1.39	EF1206-EF1207	EF1207	2	1174067	3	GalR-S	tgtaaacgttttc	1174107	5						up
EF1206	[C] malate dehydrogenase, decarboxylating		1.1.1.39	EF1206-EF1207	EF1207	2	1174067	3	PhoP	atttaactaaagaaaa	1174142	5						up
EF1206	[C] malate dehydrogenase, decarboxylating		1.1.1.39	EF1206-EF1207	EF1207	2	1174067	3	PurR	gtaaacgttttct	1174108	5						up
EF1207	NoCOG			EF1206-EF1207	EF1207	2	1174067	3	ArgR	taatctatattca	1174088	5						up
EF1207	NoCOG			EF1206-EF1207	EF1207	2	1174067	3	GalR-S	tgtaaacgttttc	1174107	5						up
EF1207	NoCOG			EF1206-EF1207	EF1207	2	1174067	3	PhoP	atttaactaaagaaaa	1174142	5						up
EF1207	NoCOG			EF1206-EF1207	EF1207	2	1174067	3	PurR	gtaaacgttttct	1174108	5						up
EF1209	[T] sensory box histidine kinase			EF1209-EF1210	EF1209	2	1174215	2	ArgR	taatctatattca	1174088	3
EF1209	[T] sensory box histidine kinase			EF1209-EF1210	EF1209	2	1174215	2	GalR-S	tgtaaacgttttc	1174107	3
EF1209	[T] sensory box histidine kinase			EF1209-EF1210	EF1209	2	1174215	2	PhoP	atttaactaaagaaaa	1174142	3
EF1210	[KT] response regulator			EF1209-EF1210	EF1209	2	1174215	2	ArgR	taatctatattca	1174088	3
EF1210	[KT] response regulator			EF1209-EF1210	EF1209	2	1174215	2	GalR-S	tgtaaacgttttc	1174107	3
EF1210	[KT] response regulator			EF1209-EF1210	EF1209	2	1174215	2	PhoP	atttaactaaagaaaa	1174142	3
EF1211	[R] NADH peroxidase	npr	1.11.1.1	EF1211	EF1211	1	1176624	5	ArgR	ttattttttagtaaat	1176445	3
EF1211	[R] NADH peroxidase	npr	1.11.1.1	EF1211	EF1211	1	1176624	5	LysR	aaaagaggatattatttgttattt	1176539	3
EF1215	NoCOG			EF1215	EF1215	1	1181735	5	LysR	aaaaaaaaatagtatcctttttat	1181678	1
EF1225	NoCOG			EF1225-EF1227	EF1225	3	1192656	5	CRP-FNR	tgtgaaataaaacacaat	1192614	8						down
EF1225	NoCOG			EF1225-EF1227	EF1225	3	1192656	5	LysR	aaatataataaaaaaagcgttttt	1192467	8						down
EF1226	[R] oxidoreductase, putative			EF1225-EF1227	EF1225	3	1192656	5	CRP-FNR	tgtgaaataaaacacaat	1192614	8						down
EF1226	[R] oxidoreductase, putative			EF1225-EF1227	EF1225	3	1192656	5	LysR	aaatataataaaaaaagcgttttt	1192467	8						down
EF1227	[R] hypothetical protein			EF1225-EF1227	EF1225	3	1192656	5	CRP-FNR	tgtgaaataaaacacaat	1192614	8						down
EF1227	[R] hypothetical protein			EF1225-EF1227	EF1225	3	1192656	5	LysR	aaatataataaaaaaagcgttttt	1192467	8						down
EF1232	[G] ABC transporter, permease protein			EF1232-EF1240	EF1232	9	1199468	3	FruR	gtagaaacgtttcac	1199431	3						down
EF1232	[G] ABC transporter, permease protein			EF1232-EF1240	EF1232	9	1199468	3	GalR-S	tgtaagggtttac	1199388	3						down
EF1233	[G] ABC transporter, permease protein			EF1232-EF1240	EF1232	9	1199468	3	FruR	gtagaaacgtttcac	1199431	3						down
EF1233	[G] ABC transporter, permease protein			EF1232-EF1240	EF1232	9	1199468	3	GalR-S	tgtaagggtttac	1199388	3						down
EF1234	[G] ABC transporter, substrate-binding protein, putative			EF1232-EF1240	EF1232	9	1199468	3	FruR	gtagaaacgtttcac	1199431	3						down
EF1234	[G] ABC transporter, substrate-binding protein, putative			EF1232-EF1240	EF1232	9	1199468	3	GalR-S	tgtaagggtttac	1199388	3						down
EF1235	NoCOG			EF1232-EF1240	EF1232	9	1199468	3	FruR	gtagaaacgtttcac	1199431	3						down
EF1235	NoCOG			EF1232-EF1240	EF1232	9	1199468	3	GalR-S	tgtaagggtttac	1199388	3						down
EF1236	[Q] acetyl xylan esterase, putative			EF1232-EF1240	EF1232	9	1199468	3	FruR	gtagaaacgtttcac	1199431	3						down
EF1236	[Q] acetyl xylan esterase, putative			EF1232-EF1240	EF1232	9	1199468	3	GalR-S	tgtaagggtttac	1199388	3						down
EF1237	[R] hypothetical protein			EF1232-EF1240	EF1232	9	1199468	3	FruR	gtagaaacgtttcac	1199431	3						down
EF1237	[R] hypothetical protein			EF1232-EF1240	EF1232	9	1199468	3	GalR-S	tgtaagggtttac	1199388	3						down
EF1238	NoCOG			EF1232-EF1240	EF1232	9	1199468	3	FruR	gtagaaacgtttcac	1199431	3						down
EF1238	NoCOG			EF1232-EF1240	EF1232	9	1199468	3	GalR-S	tgtaagggtttac	1199388	3						down
EF1239	[G] hypothetical protein			EF1232-EF1240	EF1232	9	1199468	3	FruR	gtagaaacgtttcac	1199431	3						down
EF1239	[G] hypothetical protein			EF1232-EF1240	EF1232	9	1199468	3	GalR-S	tgtaagggtttac	1199388	3						down
EF1240	[K] sugar-binding transcriptional regulator, LacI family			EF1232-EF1240	EF1232	9	1199468	3	FruR	gtagaaacgtttcac	1199431	3						down
EF1240	[K] sugar-binding transcriptional regulator, LacI family			EF1232-EF1240	EF1232	9	1199468	3	GalR-S	tgtaagggtttac	1199388	3						down
EF1243	NoCOG			EF1243-EF1244	EF1243	2	1213415	5	LysR	taaataaaagtagttgacttatt	1213276	4		down
EF1244	[R] oxidoreductase, Gfo/Idh/MocA family			EF1243-EF1244	EF1243	2	1213415	5	LysR	taaataaaagtagttgacttatt	1213276	4		down
EF1246	NoCOG			EF1246	EF1246	1	1216396	5	LysR	aaaaaattaatttttaactcgttt	1216238	3						up
EF1248	NoCOG			EF1248	EF1248	1	1217571	5	CRP-FNR	acttgtgttatttatcac	1217633	1
EF1264	[M] sulfatase domain protein			EF1264	EF1264	1	1232462	4	CRP-FNR	tatttgttttaaataatt	1232438	6		up
EF1264	[M] sulfatase domain protein			EF1264	EF1264	1	1232462	4	LysR	taaaattaggtaaatttcgtattt	1232499	6		up
EF1265	[R] hypothetical protein			EF1265-EF1266	EF1265	2	1232720	5	CRP-FNR	tatttgttttaaataatt	1232438	5
EF1265	[R] hypothetical protein			EF1265-EF1266	EF1265	2	1232720	5	LysR	taaaattaggtaaatttcgtattt	1232499	5
EF1266	NoCOG			EF1265-EF1266	EF1265	2	1232720	5	CRP-FNR	tatttgttttaaataatt	1232438	5
EF1266	NoCOG			EF1265-EF1266	EF1265	2	1232720	5	LysR	taaaattaggtaaatttcgtattt	1232499	5
EF1267	[L] ribonuclease HIII	rnhC	3.1.26.-	EF1267	EF1267	1	1234876	1	ArgR	aaatttttattca	1235026	4
EF1267	[L] ribonuclease HIII	rnhC	3.1.26.-	EF1267	EF1267	1	1234876	1	CRP-FNR	atgtttttttactaacttta	1234837	4
EF1267	[L] ribonuclease HIII	rnhC	3.1.26.-	EF1267	EF1267	1	1234876	1	PhoP	gtttaggaaatgta	1234976	4
EF1268	[P] cation-transporting ATPase, E1-E2 family			EF1268	EF1268	1	1235095	2	ArgR	aaatttttattca	1235026	4		up
EF1268	[P] cation-transporting ATPase, E1-E2 family			EF1268	EF1268	1	1235095	2	CRP-FNR	atgtttttttactaacttta	1234837	4		up
EF1268	[P] cation-transporting ATPase, E1-E2 family			EF1268	EF1268	1	1235095	2	PhoP	gtttaggaaatgta	1234976	4
EF1269	[M] cell wall surface anchor family protein			EF1269	EF1269	1	1237657	4	ArgR	gaataaaaatgaa	1237649	3
EF1300	NoCOG			EF1300-EF1301	EF1300	2	1263875	5	LysR	aaaaattatataaatggctttttt	1263704	1		up			down
EF1301	NoCOG			EF1300-EF1301	EF1300	2	1263875	5	LysR	aaaaattatataaatggctttttt	1263704	1		up			down
EF1303	[K] transcriptional regulator, LysR family			EF1303	EF1303	1	1268012	1	ArgR	gaataaatacgaa	1268119	1
EF1305	[H] coproporphyrinogen III oxidase			EF1305-EF1308	EF1305	4	1271417	4	LysR	atatagaaaaatttttttactttt	1271227	8		down				up
EF1306	[K] heat-inducible transcription repressor	hrcA		EF1305-EF1308	EF1305	4	1271417	4	LysR	atatagaaaaatttttttactttt	1271227	8		down				up
EF1307	[O] heat shock protein GrpE	grpE		EF1305-EF1308	EF1305	4	1271417	4	LysR	atatagaaaaatttttttactttt	1271227	8		down				up
EF1308	[O] dnak protein	dnaK		EF1305-EF1308	EF1305	4	1271417	4	LysR	atatagaaaaatttttttactttt	1271227	8		down				up
EF1325	NoCOG			EF1325	EF1325	1	1293283	5	ArgR	tgtataattatat	1293166	1
EF1328	[K] transcriptional regulator, GntR family			EF1328	EF1328	1	1298759	1	ArgR	ccaatttatattcaaa	1298774	8
EF1340	NoCOG			EF1340	EF1340	1	1310486	5	LysR	aaaaaatagtaaaaatggtttttt	1310457	1
EF1343	[G] sugar ABC transporter, permease protein			EF1343-EF1345	EF1345	3	1317162	3	CRP-FNR	ttttgttataaataacatac	1317259	7		up
EF1343	[G] sugar ABC transporter, permease protein			EF1343-EF1345	EF1345	3	1317162	3	LysR	gttaaaaaagtttttttgttata	1317246	7
EF1343	[G] sugar ABC transporter, permease protein			EF1343-EF1345	EF1345	3	1317162	3	PurR	gcaaccgattgcg	1317204	7		up
EF1344	[G] sugar ABC transporter, permease protein			EF1343-EF1345	EF1345	3	1317162	3	CRP-FNR	ttttgttataaataacatac	1317259	7		up
EF1344	[G] sugar ABC transporter, permease protein			EF1343-EF1345	EF1345	3	1317162	3	LysR	gttaaaaaagtttttttgttata	1317246	7
EF1344	[G] sugar ABC transporter, permease protein			EF1343-EF1345	EF1345	3	1317162	3	PurR	gcaaccgattgcg	1317204	7		up
EF1345	[G] sugar ABC transporter, sugar-binding protein			EF1343-EF1345	EF1345	3	1317162	3	CRP-FNR	ttttgttataaataacatac	1317259	7		up
EF1345	[G] sugar ABC transporter, sugar-binding protein			EF1343-EF1345	EF1345	3	1317162	3	LysR	gttaaaaaagtttttttgttata	1317246	7
EF1345	[G] sugar ABC transporter, sugar-binding protein			EF1343-EF1345	EF1345	3	1317162	3	PurR	gcaaccgattgcg	1317204	7		up
EF1346	NoCOG			EF1346-EF1349	EF1346	4	1317308	5	CRP-FNR	ttttgttataaataacatac	1317259	8
EF1346	NoCOG			EF1346-EF1349	EF1346	4	1317308	5	LysR	gttaaaaaagtttttttgttata	1317246	8
EF1346	NoCOG			EF1346-EF1349	EF1346	4	1317308	5	PurR	gcaaccgattgcg	1317204	8
EF1347	NoCOG			EF1346-EF1349	EF1346	4	1317308	5	CRP-FNR	ttttgttataaataacatac	1317259	8
EF1347	NoCOG			EF1346-EF1349	EF1346	4	1317308	5	LysR	gttaaaaaagtttttttgttata	1317246	8
EF1347	NoCOG			EF1346-EF1349	EF1346	4	1317308	5	PurR	gcaaccgattgcg	1317204	8
EF1348	NoCOG			EF1346-EF1349	EF1346	4	1317308	5	CRP-FNR	ttttgttataaataacatac	1317259	8
EF1348	NoCOG			EF1346-EF1349	EF1346	4	1317308	5	LysR	gttaaaaaagtttttttgttata	1317246	8
EF1348	NoCOG			EF1346-EF1349	EF1346	4	1317308	5	PurR	gcaaccgattgcg	1317204	8
EF1349	NoCOG			EF1346-EF1349	EF1346	4	1317308	5	CRP-FNR	ttttgttataaataacatac	1317259	8
EF1349	NoCOG			EF1346-EF1349	EF1346	4	1317308	5	LysR	gttaaaaaagtttttttgttata	1317246	8
EF1349	NoCOG			EF1346-EF1349	EF1346	4	1317308	5	PurR	gcaaccgattgcg	1317204	8
EF1350	NoCOG			EF1350	EF1350	1	1322627	5	ArgR	taatttttatgaa	1322600	5
EF1353	[C] pyruvate dehydrogenase complex E1 component, alpha subunit	pdhA	1.2.4.1	EF1353-EF1356	EF1353	4	1326892	3	LysR	aaaaatgaagaaattagagttttt	1326742	8					up	up
EF1354	[C] pyruvate dehydrogenase complex, E1 component, beta subunit	pdhB	1.2.4.1	EF1353-EF1356	EF1353	4	1326892	3	LysR	aaaaatgaagaaattagagttttt	1326742	8					up	up
EF1355	[C] dihydrolipoamide acetyltransferase	aceF	2.3.1.12	EF1353-EF1356	EF1353	4	1326892	3	LysR	aaaaatgaagaaattagagttttt	1326742	8					up	up
EF1356	[C] dihydrolipoamide dehydrogenase	lpdA	1.8.1.4	EF1353-EF1356	EF1353	4	1326892	3	LysR	aaaaatgaagaaattagagttttt	1326742	8					up	up
EF1357	[T] transcriptional regulator, AraC family			EF1357	EF1357	1	1333262	2	LysR	aagttcaatgctttttagatgaaa	1333354	5
EF1358	[C] glycerol dehydrogenase			EF1358-EF1361	EF1358	4	1333423	3	LysR	aaaaatcataatattt	1333288	4					up	down
EF1359	[S] hypothetical protein			EF1358-EF1361	EF1358	4	1333423	3	LysR	aaaaatcataatattt	1333288	4					up	down
EF1360	[G] dihydroxyacetone kinase family protein			EF1358-EF1361	EF1358	4	1333423	3	LysR	aaaaatcataatattt	1333288	4					up	down
EF1361	[G] dihydroxyacetone kinase family protein			EF1358-EF1361	EF1358	4	1333423	3	LysR	aaaaatcataatattt	1333288	4					up	down
EF1370	NoCOG			EF1370	EF1370	1	1346249	5	LysR	aaaagaagaaatagagttattatt	1346187	4						up
EF1374	[P] phnA protein	phnA		EF1374	EF1374	1	1350971	2	LysR	taaaatgaaaaagaattatttttt	1350931	4
EF1378	[TK] transcriptional regulator, putative			EF1378	EF1378	1	1354964	1	LysR	acaaaaaaaatcattttctaatat	1354778	1
EF1379	[J] alanyl-tRNA synthetase	alaS	6.1.1.7	EF1379	EF1379	1	1355993	1	LysR	aatataaatagttaattattaat	1355953	8
EF1411	[G] glycosyl hydrolase, family 4			EF1411	EF1411	1	1390129	3	GalR-S	tgtaaacgataac	1390090	2
EF1417	NoCOG			EF1417-EF1418	EF1418	2	1399604	5	ArgR	tatattaaaaatcatt	1399667	1
EF1417	NoCOG			EF1417-EF1418	EF1418	2	1399604	5	LexA	gaacgtatgttc	1399713	1
EF1418	NoCOG			EF1417-EF1418	EF1418	2	1399604	5	ArgR	tatattaaaaatcatt	1399667	1
EF1418	NoCOG			EF1417-EF1418	EF1418	2	1399604	5	LexA	gaacgtatgttc	1399713	1
EF1450	[K] positive control factor, putative			EF1450	EF1450	1	1415052	1	LysR	aaaaattaaagaaaaattttaata	1414930	1
EF1459	NoCOG			EF1459-EF1485	EF1459	27	1423336	5	CRP-FNR	ttattgatttatgtaaaa	1423352	3
EF1460	NoCOG			EF1459-EF1485	EF1459	27	1423336	5	CRP-FNR	ttattgatttatgtaaaa	1423352	3
EF1461	[S] hypothetical protein			EF1459-EF1485	EF1459	27	1423336	5	CRP-FNR	ttattgatttatgtaaaa	1423352	3
EF1462	NoCOG			EF1459-EF1485	EF1459	27	1423336	5	CRP-FNR	ttattgatttatgtaaaa	1423352	3
EF1463	[S] hypothetical protein			EF1459-EF1485	EF1459	27	1423336	5	CRP-FNR	ttattgatttatgtaaaa	1423352	3
EF1464	NoCOG			EF1459-EF1485	EF1459	27	1423336	5	CRP-FNR	ttattgatttatgtaaaa	1423352	3
EF1465	NoCOG			EF1459-EF1485	EF1459	27	1423336	5	CRP-FNR	ttattgatttatgtaaaa	1423352	3
EF1466	NoCOG			EF1459-EF1485	EF1459	27	1423336	5	CRP-FNR	ttattgatttatgtaaaa	1423352	3
EF1467	NoCOG			EF1459-EF1485	EF1459	27	1423336	5	CRP-FNR	ttattgatttatgtaaaa	1423352	3
EF1468	NoCOG			EF1459-EF1485	EF1459	27	1423336	5	CRP-FNR	ttattgatttatgtaaaa	1423352	3
EF1469	NoCOG			EF1459-EF1485	EF1459	27	1423336	5	CRP-FNR	ttattgatttatgtaaaa	1423352	3
EF1470	NoCOG			EF1459-EF1485	EF1459	27	1423336	5	CRP-FNR	ttattgatttatgtaaaa	1423352	3
EF1471	NoCOG			EF1459-EF1485	EF1459	27	1423336	5	CRP-FNR	ttattgatttatgtaaaa	1423352	3
EF1472	NoCOG			EF1459-EF1485	EF1459	27	1423336	5	CRP-FNR	ttattgatttatgtaaaa	1423352	3
EF1473	[R] hypothetical protein			EF1459-EF1485	EF1459	27	1423336	5	CRP-FNR	ttattgatttatgtaaaa	1423352	3
EF1474	NoCOG			EF1459-EF1485	EF1459	27	1423336	5	CRP-FNR	ttattgatttatgtaaaa	1423352	3
EF1475	NoCOG			EF1459-EF1485	EF1459	27	1423336	5	CRP-FNR	ttattgatttatgtaaaa	1423352	3
EF1476	NoCOG			EF1459-EF1485	EF1459	27	1423336	5	CRP-FNR	ttattgatttatgtaaaa	1423352	3
EF1477	NoCOG			EF1459-EF1485	EF1459	27	1423336	5	CRP-FNR	ttattgatttatgtaaaa	1423352	3
EF1478	NoCOG			EF1459-EF1485	EF1459	27	1423336	5	CRP-FNR	ttattgatttatgtaaaa	1423352	3
EF1479	[S] hypothetical protein			EF1459-EF1485	EF1459	27	1423336	5	CRP-FNR	ttattgatttatgtaaaa	1423352	3
EF1480	NoCOG			EF1459-EF1485	EF1459	27	1423336	5	CRP-FNR	ttattgatttatgtaaaa	1423352	3
EF1481	NoCOG			EF1459-EF1485	EF1459	27	1423336	5	CRP-FNR	ttattgatttatgtaaaa	1423352	3
EF1482	NoCOG			EF1459-EF1485	EF1459	27	1423336	5	CRP-FNR	ttattgatttatgtaaaa	1423352	3
EF1483	NoCOG			EF1459-EF1485	EF1459	27	1423336	5	CRP-FNR	ttattgatttatgtaaaa	1423352	3
EF1484	NoCOG			EF1459-EF1485	EF1459	27	1423336	5	CRP-FNR	ttattgatttatgtaaaa	1423352	3
EF1485	NoCOG			EF1459-EF1485	EF1459	27	1423336	5	CRP-FNR	ttattgatttatgtaaaa	1423352	3
EF1487	NoCOG			EF1487-EF1488	EF1487	2	1444146	5	LexA	gaacgagtgttt	1444028	1
EF1488	NoCOG			EF1487-EF1488	EF1487	2	1444146	5	LexA	gaacgagtgttt	1444028	1
EF1489	NoCOG			EF1489	EF1489	1	1446058	5	LexA	gaatgtatgttc	1446090	1
EF1490	NoCOG			EF1490-EF1491	EF1491	2	1447105	3	ArgR	gttattttaattcatt	1447236	8
EF1490	NoCOG			EF1490-EF1491	EF1491	2	1447105	3	LysR	ataaaagtgaaaatttgttatttt	1447220	8
EF1491	[F] hypothetical protein			EF1490-EF1491	EF1491	2	1447105	3	ArgR	gttattttaattcatt	1447236	8
EF1491	[F] hypothetical protein			EF1490-EF1491	EF1491	2	1447105	3	LysR	ataaaagtgaaaatttgttatttt	1447220	8
EF1492	NoCOG		3.6.3.14	EF1492-EF1500	EF1492	9	1447477	3	ArgR	gttattttaattcatt	1447236	2	up	up				down
EF1492	NoCOG		3.6.3.14	EF1492-EF1500	EF1492	9	1447477	3	LysR	ataaaagtgaaaatttgttatttt	1447220	2	up	up				down
EF1493	[C] ATP synthase subunit I		3.6.3.14	EF1492-EF1500	EF1492	9	1447477	3	ArgR	gttattttaattcatt	1447236	2	up	up				down
EF1493	[C] ATP synthase subunit I		3.6.3.14	EF1492-EF1500	EF1492	9	1447477	3	LysR	ataaaagtgaaaatttgttatttt	1447220	2	up	up				down
EF1494	[C] ATP synthase subunit K		3.6.3.14	EF1492-EF1500	EF1492	9	1447477	3	ArgR	gttattttaattcatt	1447236	2	up	up				down
EF1494	[C] ATP synthase subunit K		3.6.3.14	EF1492-EF1500	EF1492	9	1447477	3	LysR	ataaaagtgaaaatttgttatttt	1447220	2	up	up				down
EF1495	NoCOG		3.6.3.14	EF1492-EF1500	EF1492	9	1447477	3	ArgR	gttattttaattcatt	1447236	2	up	up				down
EF1495	NoCOG		3.6.3.14	EF1492-EF1500	EF1492	9	1447477	3	LysR	ataaaagtgaaaatttgttatttt	1447220	2	up	up				down
EF1496	[C] V-type ATPase, subunit C		3.6.3.14	EF1492-EF1500	EF1492	9	1447477	3	ArgR	gttattttaattcatt	1447236	2	up	up				down
EF1496	[C] V-type ATPase, subunit C		3.6.3.14	EF1492-EF1500	EF1492	9	1447477	3	LysR	ataaaagtgaaaatttgttatttt	1447220	2	up	up				down
EF1497	[C] V-type ATP synthase subunit F		3.6.3.14	EF1492-EF1500	EF1492	9	1447477	3	ArgR	gttattttaattcatt	1447236	2	up	up				down
EF1497	[C] V-type ATP synthase subunit F		3.6.3.14	EF1492-EF1500	EF1492	9	1447477	3	LysR	ataaaagtgaaaatttgttatttt	1447220	2	up	up				down
EF1498	[C] V-type ATP synthase subunit A		3.6.3.14	EF1492-EF1500	EF1492	9	1447477	3	ArgR	gttattttaattcatt	1447236	2	up	up				down
EF1498	[C] V-type ATP synthase subunit A		3.6.3.14	EF1492-EF1500	EF1492	9	1447477	3	LysR	ataaaagtgaaaatttgttatttt	1447220	2	up	up				down
EF1499	[C] V-type ATP synthase subunit B		3.6.3.14	EF1492-EF1500	EF1492	9	1447477	3	ArgR	gttattttaattcatt	1447236	2	up	up				down
EF1499	[C] V-type ATP synthase subunit B		3.6.3.14	EF1492-EF1500	EF1492	9	1447477	3	LysR	ataaaagtgaaaatttgttatttt	1447220	2	up	up				down
EF1500	NoCOG		3.6.3.14	EF1492-EF1500	EF1492	9	1447477	3	ArgR	gttattttaattcatt	1447236	2	up	up				down
EF1500	NoCOG		3.6.3.14	EF1492-EF1500	EF1492	9	1447477	3	LysR	ataaaagtgaaaatttgttatttt	1447220	2	up	up				down
EF1510	NoCOG			EF1510	EF1510	1	1464965	5	ArgR	tgaattttcagtc	1465201	7						up
EF1510	NoCOG			EF1510	EF1510	1	1464965	5	CRP-FNR	atgagaagtatctcacat	1465029	7						up
EF1510	NoCOG			EF1510	EF1510	1	1464965	5	CRP-FNR	taaatgagaagtatctcaca	1465026	7						up
EF1510	NoCOG			EF1510	EF1510	1	1464965	5	LysR	taaaattcgaaattcattttattt	1465081	7						up
EF1511	[MR] mandelate racemase/muconate lactonizing enzyme family protein			EF1511-EF1513	EF1511	3	1465241	3	ArgR	tgaattttcagtc	1465201	3
EF1511	[MR] mandelate racemase/muconate lactonizing enzyme family protein			EF1511-EF1513	EF1511	3	1465241	3	CRP-FNR	atgagaagtatctcacat	1465029	3
EF1511	[MR] mandelate racemase/muconate lactonizing enzyme family protein			EF1511-EF1513	EF1511	3	1465241	3	CRP-FNR	taaatgagaagtatctcaca	1465026	3
EF1511	[MR] mandelate racemase/muconate lactonizing enzyme family protein			EF1511-EF1513	EF1511	3	1465241	3	LysR	taaaattcgaaattcattttattt	1465081	3
EF1512	[E] hypothetical protein			EF1511-EF1513	EF1511	3	1465241	3	ArgR	tgaattttcagtc	1465201	3
EF1512	[E] hypothetical protein			EF1511-EF1513	EF1511	3	1465241	3	CRP-FNR	atgagaagtatctcacat	1465029	3
EF1512	[E] hypothetical protein			EF1511-EF1513	EF1511	3	1465241	3	CRP-FNR	taaatgagaagtatctcaca	1465026	3
EF1512	[E] hypothetical protein			EF1511-EF1513	EF1511	3	1465241	3	LysR	taaaattcgaaattcattttattt	1465081	3
EF1513	[E] pheromone binding protein			EF1511-EF1513	EF1511	3	1465241	3	ArgR	tgaattttcagtc	1465201	3
EF1513	[E] pheromone binding protein			EF1511-EF1513	EF1511	3	1465241	3	CRP-FNR	atgagaagtatctcacat	1465029	3
EF1513	[E] pheromone binding protein			EF1511-EF1513	EF1511	3	1465241	3	CRP-FNR	taaatgagaagtatctcaca	1465026	3
EF1513	[E] pheromone binding protein			EF1511-EF1513	EF1511	3	1465241	3	LysR	taaaattcgaaattcattttattt	1465081	3
EF1528	NoCOG			EF1528-EF1529	EF1528	2	1485823	3	LysR	gaaataatatttttaatagcttat	1485754	1						down
EF1529	[G] PTS system, IIC component, putative			EF1528-EF1529	EF1528	2	1485823	3	LysR	gaaataatatttttaatagcttat	1485754	1						down
EF1537	[L] integrase/recombinase XerD, putative			EF1537-EF1539	EF1537	3	1492090	5	LysR	aaaataacaaatttattctttact	1491915	8						up
EF1538	[S] segregation and condensation protein A	scpA		EF1537-EF1539	EF1537	3	1492090	5	LysR	aaaataacaaatttattctttact	1491915	8						up
EF1539	NoCOG	scpB		EF1537-EF1539	EF1537	3	1492090	5	LysR	aaaataacaaatttattctttact	1491915	8						up
EF1550	NoCOG	hup		EF1550	EF1550	1	1505186	5	CRP-FNR	atattgaaccagatcaat	1505077	8
EF1575	[R] ABC transporter, ATP-binding protein			EF1575-EF1577	EF1575	3	1527135	5	FruR	ctgaaacgatttgtt	1526995	8						down
EF1576	NoCOG	thyA		EF1575-EF1577	EF1575	3	1527135	5	FruR	ctgaaacgatttgtt	1526995	8						down
EF1577	[H] dihydrofolate reductase	folA	1.5.1.3	EF1575-EF1577	EF1575	3	1527135	5	FruR	ctgaaacgatttgtt	1526995	8						down
EF1579	[KT] LexA repressor	lexA	3.4.21.88	EF1579	EF1579	1	1532343	1	CRP-FNR	atgcgaacgaaatcaaac	1532378	5						up
EF1579	[KT] LexA repressor	lexA	3.4.21.88	EF1579	EF1579	1	1532343	1	LysR	aaatatcagaatatagttgttttt	1532413	5						up
EF1580	NoCOG			EF1580	EF1580	1	1532485	5	CRP-FNR	atgcgaacgaaatcaaac	1532378	8		down
EF1580	NoCOG			EF1580	EF1580	1	1532485	5	LysR	aaatatcagaatatagttgttttt	1532413	8		down
EF1589	[R] acetyltransferase, GNAT family			EF1589-EF1590	EF1589	2	1541465	5	LysR	ataaatgactaacttacattttta	1541393	2
EF1590	NoCOG			EF1589-EF1590	EF1589	2	1541465	5	LysR	ataaatgactaacttacattttta	1541393	2
EF1601	[G] PTS system, IIABC components		2.7.1.69	EF1601-EF1602	EF1602	2	1556995	3	CRP-FNR	ttttgatttaaatagattta	1557124	4
EF1601	[G] PTS system, IIABC components		2.7.1.69	EF1601-EF1602	EF1602	2	1556995	3	GalR-S	tgtaaccgttttt	1557038	4
EF1601	[G] PTS system, IIABC components		2.7.1.69	EF1601-EF1602	EF1602	2	1556995	3	LysR	gtaaattataatattcttttgatt	1557108	4
EF1602	NoCOG			EF1601-EF1602	EF1602	2	1556995	3	CRP-FNR	ttttgatttaaatagattta	1557124	4
EF1602	NoCOG			EF1601-EF1602	EF1602	2	1556995	3	GalR-S	tgtaaccgttttt	1557038	4
EF1602	NoCOG			EF1601-EF1602	EF1602	2	1556995	3	LysR	gtaaattataatattcttttgatt	1557108	4
EF1603	NoCOG	scrB-1	3.2.1.26	EF1603-EF1604	EF1603	2	1557238	1	CRP-FNR	ttttgatttaaatagattta	1557124	6						up
EF1603	NoCOG	scrB-1	3.2.1.26	EF1603-EF1604	EF1603	2	1557238	1	GalR-S	tgtaaccgttttt	1557038	6						up
EF1603	NoCOG	scrB-1	3.2.1.26	EF1603-EF1604	EF1603	2	1557238	1	LysR	gtaaattataatattcttttgatt	1557108	6						up
EF1604	[K] sucrose operon repressor ScrR	scrR-1		EF1603-EF1604	EF1603	2	1557238	1	CRP-FNR	ttttgatttaaatagattta	1557124	6						up
EF1604	[K] sucrose operon repressor ScrR	scrR-1		EF1603-EF1604	EF1603	2	1557238	1	GalR-S	tgtaaccgttttt	1557038	6						up
EF1604	[K] sucrose operon repressor ScrR	scrR-1		EF1603-EF1604	EF1603	2	1557238	1	LysR	gtaaattataatattcttttgatt	1557108	6						up
EF1610	NoCOG			EF1610-EF1613	EF1613	4	1570915	3	CRP-FNR	tgtgattagtataacaca	1570968	8
EF1611	[C] putative manganese-dependent inorganic pyrophosphatase	ppaC	3.6.1.1	EF1610-EF1613	EF1613	4	1570915	3	CRP-FNR	tgtgattagtataacaca	1570968	8
EF1612	[O] pyruvate formate-lyase activating enzyme	pflA	1.97.1.4	EF1610-EF1613	EF1613	4	1570915	3	CRP-FNR	tgtgattagtataacaca	1570968	8
EF1613	[C] formate acetyltransferase	pflB	2.3.1.54	EF1610-EF1613	EF1613	4	1570915	3	CRP-FNR	tgtgattagtataacaca	1570968	8
EF1643	[S] conserved hypothetical protein TIGR00023			EF1643	EF1643	1	1595692	5	GalR-S	tgtcaacgcttcc	1595575	8
EF1655	[H] 2-dehydropantoate 2-reductase			EF1655	EF1655	1	1609365	4	GalR-S	tgtaagcgctttt	1609509	4
EF1656	[K] transcriptional regulator, LysR family			EF1656	EF1656	1	1609542	1	GalR-S	tgtaagcgctttt	1609509	5
EF1664	[S] hypothetical protein			EF1664	EF1664	1	1618590	5	GalR-S	tgtaaacgcatac	1618355	3
EF1667	[IQR] short chain dehydrogenase family protein			EF1667	EF1667	1	1621460	4	ArgR	cgaataaattagcatt	1621476	3		down
EF1674	NoCOG			EF1674-EF1676	EF1676	3	1629647	4	ArgR	gtataacaattca	1629811	3	up
EF1675	[V] ABC transporter, ATP-binding protein			EF1674-EF1676	EF1676	3	1629647	4	ArgR	gtataacaattca	1629811	3	up
EF1676	[K] transcriptional regulator, GntR family			EF1674-EF1676	EF1676	3	1629647	4	ArgR	gtataacaattca	1629811	3	up
EF1685	[R] hemolysin III	hlyIII		EF1685	EF1685	1	1635832	5	Fis	tgccgaatttttcatca	1635799	8						up
EF1686	NoCOG			EF1686	EF1686	1	1636688	5	CRP-FNR	ttttattgccctaaatctct	1636536	1						up
EF1686	NoCOG			EF1686	EF1686	1	1636688	5	LexA	gaacactcgttc	1636652	1						up
EF1695	NoCOG			EF1695	EF1695	1	1644493	5	ArgR	gttttttaattca	1644500	1
EF1695	NoCOG			EF1695	EF1695	1	1644493	5	PurR	taaaacgtttgcg	1644644	1
EF1698	[R] NADPH-dependent FMN reductase domain protein			EF1698	EF1698	1	1644784	5	ArgR	gttttttaattca	1644500	5
EF1698	[R] NADPH-dependent FMN reductase domain protein			EF1698	EF1698	1	1644784	5	PurR	taaaacgtttgcg	1644644	5
EF1706	[E] hypothetical protein			EF1706	EF1706	1	1653389	3	ArgR	ttatttatttttcgaa	1653547	7						down
EF1706	[E] hypothetical protein			EF1706	EF1706	1	1653389	3	CRP-FNR	tttattataaatatctca	1653471	7						down
EF1706	[E] hypothetical protein			EF1706	EF1706	1	1653389	3	FruR	ttaaatccatttagc	1653380	7						down
EF1707	[G] glycosyl hydrolase, family 38			EF1707-EF1708	EF1708	2	1657542	3	ArgR	tgattatttacaaaat	1657728	4
EF1707	[G] glycosyl hydrolase, family 38			EF1707-EF1708	EF1708	2	1657542	3	CRP-FNR	agtgatttcgatcatttt	1657612	4
EF1708	NoCOG			EF1707-EF1708	EF1708	2	1657542	3	ArgR	tgattatttacaaaat	1657728	4
EF1708	NoCOG			EF1707-EF1708	EF1708	2	1657542	3	CRP-FNR	agtgatttcgatcatttt	1657612	4
EF1709	[K] sugar-binding transcriptional regulator, GntR family			EF1709	EF1709	1	1657699	1	ArgR	tgattatttacaaaat	1657728	5						up
EF1709	[K] sugar-binding transcriptional regulator, GntR family			EF1709	EF1709	1	1657699	1	CRP-FNR	agtgatttcgatcatttt	1657612	5						up
EF1710	[K] transcriptional regulator, LysR family			EF1710-EF1711	EF1711	2	1660580	1	DeoR	tgttaaaactcta	1660623	5
EF1711	NoCOG			EF1710-EF1711	EF1711	2	1660580	1	DeoR	tgttaaaactcta	1660623	5
EF1727	NoCOG	ebsa		EF1727	EF1727	1	1677424	5	CRP-FNR	tgttataatagtaacata	1677470	3
EF1728	[L] EbsB protein	ebsB		EF1728	EF1728	1	1677525	1	CRP-FNR	tgttataatagtaacata	1677470	2						up
EF1735	NoCOG			EF1735	EF1735	1	1683586	5	LysR	aataatgaaaaaagtctgattttt	1683538	1
EF1740	[M] penicillin-binding protein 1B, putative			EF1740	EF1740	1	1687297	4	ArgR	gaaaaataattca	1687326	5
EF1741	[K] catabolite control protein A	ccpA		EF1741	EF1741	1	1690814	1	CRP-FNR	atatgaatttgttctcattt	1690831	8
EF1741	[K] catabolite control protein A	ccpA		EF1741	EF1741	1	1690814	1	CRP-FNR	ctgtgattcacttcagaa	1690990	8
EF1743	[E] proline dipeptidase	pepQ-2	3.4.13.9	EF1743	EF1743	1	1691029	3	CRP-FNR	atatgaatttgttctcattt	1690831	8		down				down
EF1743	[E] proline dipeptidase	pepQ-2	3.4.13.9	EF1743	EF1743	1	1691029	3	CRP-FNR	ctgtgattcacttcagaa	1690990	8		down				down
EF1770	NoCOG			EF1770	EF1770	1	1716644	5	DeoR	tgttagaaagcta	1716787	1
EF1774	[S] hypothetical protein			EF1774	EF1774	1	1718666	5	CRP-FNR	ggttatggttatcactaa	1718615	7
EF1775	[S] hypothetical protein			EF1775-EF1776	EF1776	2	1720311	5	ArgR	tgagtaattatcc	1720491	2						up
EF1776	NoCOG			EF1775-EF1776	EF1776	2	1720311	5	ArgR	tgagtaattatcc	1720491	2						up
EF1787	[F] phosphoribosylaminoimidazole carboxylase catalytic subunit	purE	4.1.1.21	EF1786-EF1787	EF1787	2	1731887	3	LysR	gaaatattatagattaaaattata	1731961	7						up
EF1791	[E] pheromone binding protein			EF1791	EF1791	1	1735689	3	LysR	aaatacaaaccattgtgattttta	1735653	3
EF1792	NoCOG			EF1792	EF1792	1	1735994	5	Fis	tgctgatttaataagca	1736055	1
EF1793	[EH] branched-chain amino acid aminotransferase	ilvE	2.6.1.42	EF1793	EF1793	1	1737225	3	ArgR	cgaaaaattattcagt	1737409	6						up
EF1794	NoCOG			EF1794	EF1794	1	1737868	5	ArgR	aggataatcattc	1737842	3						up
EF1796	NoCOG			EF1796	EF1796	1	1738047	5	ArgR	aggataatcattc	1737842	2	up					down
EF1797	NoCOG			EF1797	EF1797	1	1739349	5	ArgR	gattttttattta	1739367	1
EF1800	NoCOG			EF1800	EF1800	1	1744839	5	MalI	aaatcgtttt	1744813	2
EF1810	[M] general stress protein A	gspA-1		EF1810-EF1811	EF1811	2	1755461	4	CRP-FNR	aatataattataataaaa	1755556	6						down
EF1810	[M] general stress protein A	gspA-1		EF1810-EF1811	EF1811	2	1755461	4	LysR	ataaaataatgagcatatgatttg	1755532	6						down
EF1811	[M] general stress protein A	gspA-2		EF1810-EF1811	EF1811	2	1755461	4	CRP-FNR	aatataattataataaaa	1755556	6						down
EF1811	[M] general stress protein A	gspA-2		EF1810-EF1811	EF1811	2	1755461	4	LysR	ataaaataatgagcatatgatttg	1755532	6						down
EF1820	NoCOG			EF1820-EF1821	EF1821	2	1766796	4	ArgR	ttccttaattagtcat	1766860	7						up
EF1821	[OTK] agrBfs protein	agrBfs		EF1820-EF1821	EF1821	2	1766796	4	ArgR	ttccttaattagtcat	1766860	7						up
EF1822	[KT] response regulator			EF1822	EF1822	1	1767616	1	CRP-FNR	ctgttagtatattcacataa	1767727	8
EF1834	[G] galactose-6-phosphate isomerase	lacB	5.3.1.26	EF1834-EF1835	EF1835	2	1784844	3	ArgR	taaataataatat	1785033	3
EF1835	[G] galactose-6-phosphate isomerase	lacA	5.3.1.26	EF1834-EF1835	EF1835	2	1784844	3	ArgR	taaataataatat	1785033	3
EF1843	NoCOG			EF1843	EF1843	1	1790375	5	ArgR	tattttttattaa	1790227	1
EF1851	[G] glycosyl hydrolase, family 35			EF1851	EF1851	1	1798012	3	LysR	atttttaaccacgttaatttattt	1798127	2
EF1851	[G] glycosyl hydrolase, family 35			EF1851	EF1851	1	1798012	3	PurR	ctcaaacgtttgc	1797998	2
EF1867	[V] permease, putative			EF1867-EF1869	EF1869	3	1815765	4	ArgR	gaatctttattca	1815878	5
EF1868	[V] ABC transporter, ATP-binding protein			EF1867-EF1869	EF1869	3	1815765	4	ArgR	gaatctttattca	1815878	5
EF1869	NoCOG			EF1867-EF1869	EF1869	3	1815765	4	ArgR	gaatctttattca	1815878	5
EF1880	NoCOG			EF1880	EF1880	1	1826796	5	LysR	aatataaacatcatgcttaatttt	1826758	1
EF1889	NoCOG			EF1889	EF1889	1	1833447	5	DnaA	gtatccac	1833634	1
EF1892	[D] FtsK/SpoIIIE family protein			EF1892	EF1892	1	1837475	4	ArgR	tgatttaaaaagcctt	1837588	3
EF1898	NoCOG	rplS		EF1898-EF1900	EF1900	3	1844798	5	ArgR	aattaaaaataaa	1844936	8						up
EF1899	NoCOG	trmD	2.1.1.31	EF1898-EF1900	EF1900	3	1844798	5	ArgR	aattaaaaataaa	1844936	8						up
EF1900	[J] 16S rRNA processing protein RimM	rimM		EF1898-EF1900	EF1900	3	1844798	5	ArgR	aattaaaaataaa	1844936	8						up
EF1901	[P] Mn2+/Fe2+ transporter, NRAMP family			EF1901	EF1901	1	1846267	2	ArgR	tgcataattaagc	1846229	4
EF1901	[P] Mn2+/Fe2+ transporter, NRAMP family			EF1901	EF1901	1	1846267	2	GalR-S	tgtaaactgttac	1846358	4
EF1902	[E] glyoxylase family protein			EF1902	EF1902	1	1846464	3	ArgR	tgcataattaagc	1846229	1						up
EF1902	[E] glyoxylase family protein			EF1902	EF1902	1	1846464	3	GalR-S	tgtaaactgttac	1846358	1						up
EF1906	[R] hypothetical protein			EF1906-EF1907	EF1907	2	1850924	3	DeoR	tgctagcattcta	1851033	8						up
EF1907	[I] maoC family protein			EF1906-EF1907	EF1907	2	1850924	3	DeoR	tgctagcattcta	1851033	8						up
EF1911	[S] hypothetical protein			EF1911	EF1911	1	1854747	5	Fur	aaaaataataattcttcactttt	1854659	3
EF1919	NoCOG			EF1919-EF1921	EF1921	3	1862973	3	DeoR	cttttagaatgcttac	1863107	4
EF1919	NoCOG			EF1919-EF1921	EF1921	3	1862973	3	PurR	ggaaacgttttct	1863011	4
EF1920	[C] C4-dicarboxylate anaerobic carrier			EF1919-EF1921	EF1921	3	1862973	3	DeoR	cttttagaatgcttac	1863107	4
EF1920	[C] C4-dicarboxylate anaerobic carrier			EF1919-EF1921	EF1921	3	1862973	3	PurR	ggaaacgttttct	1863011	4
EF1921	[F] inosine-uridine preferring nucleoside hydrolase		3.2.2.1	EF1919-EF1921	EF1921	3	1862973	3	DeoR	cttttagaatgcttac	1863107	4
EF1921	[F] inosine-uridine preferring nucleoside hydrolase		3.2.2.1	EF1919-EF1921	EF1921	3	1862973	3	PurR	ggaaacgttttct	1863011	4
EF1922	[K] transcriptional regulator, LacI family/carbohydrate kinase, PfkB family protein		2.7.1.15	EF1922	EF1922	1	1863156	1	DeoR	cttttagaatgcttac	1863107	1
EF1922	[K] transcriptional regulator, LacI family/carbohydrate kinase, PfkB family protein		2.7.1.15	EF1922	EF1922	1	1863156	1	PurR	ggaaacgttttct	1863011	1
EF1955	[KT] sigma-54 dependent DNA-binding response regulator			EF1955	EF1955	1	1894830	1	Fis	tgcgtaaataatcaaca	1894797	2
EF1975	[S] conserved hypothetical protein TIGR00046			EF1975-EF1978	EF1978	4	1916267	5	LexA	gaatgtacgttc	1916330	7		up
EF1976	[J] ribosomal protein L11 methyltransferase	prmA	2.1.1.-	EF1975-EF1978	EF1978	4	1916267	5	LexA	gaatgtacgttc	1916330	7		up
EF1977	NoCOG			EF1975-EF1978	EF1978	4	1916267	5	LexA	gaatgtacgttc	1916330	7		up
EF1978	NoCOG		3.2.2.-	EF1975-EF1978	EF1978	4	1916267	5	LexA	gaatgtacgttc	1916330	7		up
EF1979	[L] ATPase, AAA family			EF1979	EF1979	1	1916384	1	LexA	gaatgtacgttc	1916330	8						up
EF2001	[S] minor structural protein			EF2001-EF2003	EF2003	3	1937377	5	ArgR	tgcataaattttcaaa	1937458	3
EF2001	[S] minor structural protein			EF2001-EF2003	EF2003	3	1937377	5	CRP-FNR	tgtgttttcgatctcatt	1937488	3
EF2002	[S] tail protein, putative			EF2001-EF2003	EF2003	3	1937377	5	ArgR	tgcataaattttcaaa	1937458	3
EF2002	[S] tail protein, putative			EF2001-EF2003	EF2003	3	1937377	5	CRP-FNR	tgtgttttcgatctcatt	1937488	3
EF2003	[S] tape measure protein, putative			EF2001-EF2003	EF2003	3	1937377	5	ArgR	tgcataaattttcaaa	1937458	3
EF2003	[S] tape measure protein, putative			EF2001-EF2003	EF2003	3	1937377	5	CRP-FNR	tgtgttttcgatctcatt	1937488	3
EF2013	NoCOG			EF2013-EF2018	EF2018	6	1948114	5	CRP-FNR	ttgttattaaaatcaacgtt	1948389	3
EF2014	NoCOG			EF2013-EF2018	EF2018	6	1948114	5	CRP-FNR	ttgttattaaaatcaacgtt	1948389	3
EF2015	NoCOG			EF2013-EF2018	EF2018	6	1948114	5	CRP-FNR	ttgttattaaaatcaacgtt	1948389	3
EF2016	NoCOG			EF2013-EF2018	EF2018	6	1948114	5	CRP-FNR	ttgttattaaaatcaacgtt	1948389	3
EF2017	[S] terminase, large subunit, putative			EF2013-EF2018	EF2018	6	1948114	5	CRP-FNR	ttgttattaaaatcaacgtt	1948389	3
EF2018	NoCOG			EF2013-EF2018	EF2018	6	1948114	5	CRP-FNR	ttgttattaaaatcaacgtt	1948389	3
EF2022	NoCOG			EF2022	EF2022	1	1951708	5	LexA	gaacgaacgttc	1951841	1
EF2051	[K] transcriptional regulator, GntR family			EF2051	EF2051	1	1971644	1	LysR	aaaaaagaacaaaaatagataaat	1971728	2
EF2062	NoCOG			EF2062	EF2062	1	1984026	5	CRP-FNR	tgtgatgaaaattacgga	1984148	1
EF2063	[S] transcriptional regulator, AraC family			EF2063	EF2063	1	1985363	5	ArgR	gaatattttttca	1985515	2
EF2071	NoCOG			EF2071-EF2073	EF2073	3	1994813	3	PurR	aagaaacggttttctt	1994907	8						up
EF2072	[E] aminotransferase, class V			EF2071-EF2073	EF2073	3	1994813	3	PurR	aagaaacggttttctt	1994907	8						up
EF2073	[FE] ribose-phosphate pyrophosphokinase	prsA-1	2.7.6.1	EF2071-EF2073	EF2073	3	1994813	3	PurR	aagaaacggttttctt	1994907	8						up
EF2083	NoCOG			EF2083	EF2083	1	2004462	5	LysR	aaaactgttgacaatctctttttt	2004452	1
EF2084	NoCOG			EF2084	EF2084	1	2004910	5	LexA	gaacgaaagttc	2004869	1
EF2084	NoCOG			EF2084	EF2084	1	2004910	5	LysR	aaaagtacccaatttttttgtatt	2004819	1
EF2086	[M] endolysin			EF2086-EF2098	EF2098	13	2021599	5	ArgR	aaataattattca	2021644	4
EF2087	NoCOG			EF2086-EF2098	EF2098	13	2021599	5	ArgR	aaataattattca	2021644	4
EF2088	NoCOG			EF2086-EF2098	EF2098	13	2021599	5	ArgR	aaataattattca	2021644	4
EF2089	NoCOG			EF2086-EF2098	EF2098	13	2021599	5	ArgR	aaataattattca	2021644	4
EF2090	NoCOG			EF2086-EF2098	EF2098	13	2021599	5	ArgR	aaataattattca	2021644	4
EF2091	NoCOG			EF2086-EF2098	EF2098	13	2021599	5	ArgR	aaataattattca	2021644	4
EF2092	NoCOG			EF2086-EF2098	EF2098	13	2021599	5	ArgR	aaataattattca	2021644	4
EF2093	NoCOG			EF2086-EF2098	EF2098	13	2021599	5	ArgR	aaataattattca	2021644	4
EF2094	NoCOG			EF2086-EF2098	EF2098	13	2021599	5	ArgR	aaataattattca	2021644	4
EF2095	NoCOG			EF2086-EF2098	EF2098	13	2021599	5	ArgR	aaataattattca	2021644	4
EF2096	[L] tail protein			EF2086-EF2098	EF2098	13	2021599	5	ArgR	aaataattattca	2021644	4
EF2097	NoCOG			EF2086-EF2098	EF2098	13	2021599	5	ArgR	aaataattattca	2021644	4
EF2098	NoCOG			EF2086-EF2098	EF2098	13	2021599	5	ArgR	aaataattattca	2021644	4
EF2126	NoCOG			EF2126-EF2134	EF2134	9	2042928	5	FruR	ctgaagcaattctgt	2043030	5					down
EF2127	NoCOG			EF2126-EF2134	EF2134	9	2042928	5	FruR	ctgaagcaattctgt	2043030	5					down
EF2128	[L] hypothetical protein			EF2126-EF2134	EF2134	9	2042928	5	FruR	ctgaagcaattctgt	2043030	5					down
EF2129	[L] DNA replication protein, putative			EF2126-EF2134	EF2134	9	2042928	5	FruR	ctgaagcaattctgt	2043030	5					down
EF2130	[L] DnaD domain protein			EF2126-EF2134	EF2134	9	2042928	5	FruR	ctgaagcaattctgt	2043030	5					down
EF2131	NoCOG			EF2126-EF2134	EF2134	9	2042928	5	FruR	ctgaagcaattctgt	2043030	5					down
EF2132	NoCOG			EF2126-EF2134	EF2134	9	2042928	5	FruR	ctgaagcaattctgt	2043030	5					down
EF2133	NoCOG			EF2126-EF2134	EF2134	9	2042928	5	FruR	ctgaagcaattctgt	2043030	5					down
EF2134	NoCOG			EF2126-EF2134	EF2134	9	2042928	5	FruR	ctgaagcaattctgt	2043030	5					down
EF2145	NoCOG			EF2145	EF2145	1	2047004	5	ArgR	gtatttaaattaa	2046968	7
EF2145	NoCOG			EF2145	EF2145	1	2047004	5	LexA	gaacatatattc	2046884	7
EF2145	NoCOG			EF2145	EF2145	1	2047004	5	LysR	aaaaatcgttcttaaatgtattta	2046951	7
EF2146	NoCOG			EF2146	EF2146	1	2048429	5	ArgR	tgaataattatct	2048240	1
EF2149	NoCOG			EF2149	EF2149	1	2051830	5	CRP-FNR	cgtgatataaggcatatt	2051907	1						down
EF2159	NoCOG	glnA	6.3.1.2	EF2159-EF2160	EF2160	2	2068438	1	LexA	gaacttatgtta	2068496	8		down			down	up
EF2159	NoCOG	glnA	6.3.1.2	EF2159-EF2160	EF2160	2	2068438	1	LysR	aaaaaatagaaatgatttgttttt	2068587	8		down				up
EF2160	[K] regulatory protein GlnR	glnR		EF2159-EF2160	EF2160	2	2068438	1	LexA	gaacttatgtta	2068496	8		down			down	up
EF2160	[K] regulatory protein GlnR	glnR		EF2159-EF2160	EF2160	2	2068438	1	LysR	aaaaaatagaaatgatttgttttt	2068587	8		down				up
EF2169	[M] hypothetical protein			EF2169	EF2169	1	2079270	4	ArgR	aaattaataatca	2079281	2
EF2212	NoCOG			EF2212	EF2212	1	2124515	5	ArgR	ttaaataaatatccat	2124500	3
EF2225	[K] transcriptional regulator, MerR family			EF2225	EF2225	1	2144259	1	Fis	tgtgtaatttttttcca	2144242	8
EF2228	[J] tryptophanyl-tRNA synthetase			EF2228	EF2228	1	2148990	1	ArgR	agaatatttattg	2149064	8
EF2229	NoCOG			EF2229-EF2230	EF2230	2	2153910	5	LysR	ttatgtaaaaattatttattcttt	2154000	1
EF2230	NoCOG			EF2229-EF2230	EF2230	2	2153910	5	LysR	ttatgtaaaaattatttattcttt	2154000	1
EF2234	[G] sugar ABC transporter, sugar-binding protein, putative			EF2234	EF2234	1	2157915	3	GalR-S	agttaacgcttcc	2157998	3
EF2235	NoCOG			EF2235-EF2237	EF2237	3	2161289	5	CRP-FNR	tagaatggcaactatcac	2161461	1
EF2235	NoCOG			EF2235-EF2237	EF2237	3	2161289	5	LysR	aaaaaaagctttttcttgcttttt	2161383	1
EF2236	[S] hypothetical protein			EF2235-EF2237	EF2237	3	2161289	5	CRP-FNR	tagaatggcaactatcac	2161461	1
EF2236	[S] hypothetical protein			EF2235-EF2237	EF2237	3	2161289	5	LysR	aaaaaaagctttttcttgcttttt	2161383	1
EF2237	NoCOG			EF2235-EF2237	EF2237	3	2161289	5	CRP-FNR	tagaatggcaactatcac	2161461	1
EF2237	NoCOG			EF2235-EF2237	EF2237	3	2161289	5	LysR	aaaaaaagctttttcttgcttttt	2161383	1
EF2238	[K] sugar-binding transcriptional regulator, LacI family			EF2238	EF2238	1	2161465	1	CRP-FNR	tagaatggcaactatcac	2161461	1
EF2238	[K] sugar-binding transcriptional regulator, LacI family			EF2238	EF2238	1	2161465	1	LysR	aaaaaaagctttttcttgcttttt	2161383	1
EF2239	NoCOG			EF2239	EF2239	1	2163400	5	CRP-FNR	attttagtaaattaatatat	2163436	1
EF2239	NoCOG			EF2239	EF2239	1	2163400	5	LysR	attattttagtaaattaatatatt	2163433	1
EF2243	NoCOG			EF2243-EF2245	EF2245	3	2167401	5	LysR	ttattttttaaatatgataaattt	2167520	1
EF2244	NoCOG			EF2243-EF2245	EF2245	3	2167401	5	LysR	ttattttttaaatatgataaattt	2167520	1
EF2245	NoCOG			EF2243-EF2245	EF2245	3	2167401	5	LysR	ttattttttaaatatgataaattt	2167520	1
EF2252	NoCOG			EF2252-EF2254	EF2254	3	2176981	5	MalI	aaaacgtttg	2177168	3
EF2253	NoCOG			EF2252-EF2254	EF2254	3	2176981	5	MalI	aaaacgtttg	2177168	3
EF2254	NoCOG			EF2252-EF2254	EF2254	3	2176981	5	MalI	aaaacgtttg	2177168	3
EF2255	[L] site-specific recombinase, phage integrase family			EF2255	EF2255	1	2178453	1	CRP-FNR	atattttgaagtagattata	2178599	1
EF2255	[L] site-specific recombinase, phage integrase family			EF2255	EF2255	1	2178453	1	LysR	aaaaatatcattattttacttttt	2178567	1
EF2260	NoCOG			EF2260	EF2260	1	2181852	5	ArgR	gaatttaaaatct	2181786	1
EF2260	NoCOG			EF2260	EF2260	1	2181852	5	CRP-FNR	atgaatgatcttgagcaa	2181852	1
EF2260	NoCOG			EF2260	EF2260	1	2181852	5	CRP-FNR	taaatgtgctcttcatcgccctat	2181729	1
EF2262	NoCOG			EF2262	EF2262	1	2184111	5	ArgR	tgattaataattg	2184083	1
EF2282	NoCOG			EF2282	EF2282	1	2204066	5	CRP-FNR	attgttttttaaattaaa	2204008	1
EF2304	[K] transcriptional regulator, Cro/CI family			EF2304	EF2304	1	2221559	1	GalR-S	tggatacgatttc	2221593	2
EF2341	NoCOG			EF2341-EF2342	EF2342	2	2264083	5	ArgR	ttctttaatataaatt	2264175	1
EF2341	NoCOG			EF2341-EF2342	EF2342	2	2264083	5	LysR	aagaaatataacataaaaaagatt	2264156	1
EF2342	NoCOG			EF2341-EF2342	EF2342	2	2264083	5	ArgR	ttctttaatataaatt	2264175	1
EF2342	NoCOG			EF2341-EF2342	EF2342	2	2264083	5	LysR	aagaaatataacataaaaaagatt	2264156	1
EF2343	[D] FtsK/SpoIIIE family protein			EF2343	EF2343	1	2265535	4	FruR	ctgtttcgtttcaac	2265627	3
EF2364	[F] xanthine permease			EF2364-EF2365	EF2365	2	2288174	3	LysR	aaataaaacaaagtgctatttata	2288254	8		down			down	up
EF2365	[F] xanthine phosphoribosyltransferase	xpt	2.4.2.-	EF2364-EF2365	EF2365	2	2288174	3	LysR	aaataaaacaaagtgctatttata	2288254	8		down			down	up
EF2368	NoCOG			EF2368-EF2369	EF2369	2	2290777	5	ArgR	tgcataatcattc	2290773	1		down				up
EF2368	NoCOG			EF2368-EF2369	EF2369	2	2290777	5	CRP-FNR	attttatcatatttacaaaa	2290842	1		down				up
EF2369	NoCOG			EF2368-EF2369	EF2369	2	2290777	5	ArgR	tgcataatcattc	2290773	1		down				up
EF2369	NoCOG			EF2368-EF2369	EF2369	2	2290777	5	CRP-FNR	attttatcatatttacaaaa	2290842	1		down				up
EF2370	[R] oxidoreductase, Gfo/Idh/MocA family			EF2370	EF2370	1	2290950	5	ArgR	tgcataatcattc	2290773	3						up
EF2370	[R] oxidoreductase, Gfo/Idh/MocA family			EF2370	EF2370	1	2290950	5	CRP-FNR	attttatcatatttacaaaa	2290842	3						up
EF2371	[J] asparaginyl-tRNA synthetase	asnS	6.1.1.22	EF2371-EF2373	EF2373	3	2295082	1	ArgR	tgtttaaaaattcctt	2295163	8						down
EF2372	[E] aspartate aminotransferase	aspB	2.6.1.1	EF2371-EF2373	EF2373	3	2295082	1	ArgR	tgtttaaaaattcctt	2295163	8						down
EF2373	NoCOG			EF2371-EF2373	EF2373	3	2295082	1	ArgR	tgtttaaaaattcctt	2295163	8						down
EF2377	[E] amino acid permease family protein			EF2377	EF2377	1	2301117	3	Fur	aaaaaaaataaagctcttcattt	2301139	4
EF2379	[J] prolyl-tRNA synthetase	proS	6.1.1.15	EF2379-EF2380	EF2380	2	2308993	1	CRP-FNR	attttagcatattcactcat	2309160	8						down
EF2380	[M] membrane-associated zinc metalloprotease, putative			EF2379-EF2380	EF2380	2	2308993	1	CRP-FNR	attttagcatattcactcat	2309160	8						down
EF2415	[S] hypothetical protein			EF2415-EF2416	EF2416	2	2336335	1	LysR	aaaatacgaaatttttgtttgatt	2336463	8		down				down
EF2416	[J] ribosomal protein S21	rpsU		EF2415-EF2416	EF2416	2	2336335	1	LysR	aaaatacgaaatttttgtttgatt	2336463	8		down				down
EF2417	[P] transcriptional regulator, Fur family			EF2417	EF2417	1	2336935	2	Fur	tatttcgtaatgattctgattta	2336990	3						up
EF2419	NoCOG			EF2419	EF2419	1	2337067	5	ArgR	taattttattata	2336998	4
EF2419	NoCOG			EF2419	EF2419	1	2337067	5	LysR	gaaaaaaaatgtgtgacgattttt	2337055	4
EF2432	[R] metallo-beta-lactamase superfamily protein			EF2432	EF2432	1	2351526	5	CRP-FNR	aatgtgatttttttaaaa	2351369	4						up
EF2432	[R] metallo-beta-lactamase superfamily protein			EF2432	EF2432	1	2351526	5	LysR	taactataaaaatgtgatttttt	2351359	4						up
EF2434	[K] phosphosugar-binding transcriptional regulator, RpiR family			EF2434-EF2437	EF2437	4	2357340	3	LysR	aaaatttcaactatttttctaaat	2357388	5		up
EF2435	[G] PTS system, IIBC components		2.7.1.69	EF2434-EF2437	EF2437	4	2357340	3	LysR	aaaatttcaactatttttctaaat	2357388	5		up
EF2436	[R] hypothetical protein			EF2434-EF2437	EF2437	4	2357340	3	LysR	aaaatttcaactatttttctaaat	2357388	5		up
EF2437	NoCOG			EF2434-EF2437	EF2437	4	2357340	3	LysR	aaaatttcaactatttttctaaat	2357388	5		up
EF2438	NoCOG			EF2438	EF2438	1	2357985	5	LysR	ttgtataattctaaaatttatttt	2358054	2
EF2439	NoCOG		2.7.1.66	EF2439	EF2439	1	2358167	5	LysR	ttgtataattctaaaatttatttt	2358054	6						up
EF2446	[L] hypothetical protein			EF2446-EF2449	EF2449	4	2368433	1	FruR	ttgaaccgtttttac	2368562	8						up
EF2447	[R] DNA internalization-related competence protein ComEC/Rec2			EF2446-EF2449	EF2449	4	2368433	1	FruR	ttgaaccgtttttac	2368562	8						up
EF2448	[F] comE operon protein 2, putative			EF2446-EF2449	EF2449	4	2368433	1	FruR	ttgaaccgtttttac	2368562	8						up
EF2449	[L] competence protein comEA	comEA		EF2446-EF2449	EF2449	4	2368433	1	FruR	ttgaaccgtttttac	2368562	8						up
EF2450	[T] PDZ domain protein			EF2450-EF2452	EF2452	3	2370633	4	ArgR	tcttttataattcatt	2370658	8						up
EF2451	[H] pantetheine-phosphate adenylyltransferase	coaD		EF2450-EF2452	EF2452	3	2370633	4	ArgR	tcttttataattcatt	2370658	8						up
EF2452	[L] methylase, putative			EF2450-EF2452	EF2452	3	2370633	4	ArgR	tcttttataattcatt	2370658	8						up
EF2480	NoCOG			EF2480	EF2480	1	2402668	5	LysR	ttcataaaaataatggtgttatt	2402468	1
EF2484	[R] hypothetical protein			EF2484	EF2484	1	2405616	5	ArgR	ttattatttaagtata	2405674	1					down
EF2492	[M] glycosyl transferase, group 2 family protein			EF2492-EF2493	EF2493	2	2418663	4	ArgR	aagtataaattta	2418838	3
EF2493	[M] teichoic acid biosynthesis protein, putative			EF2492-EF2493	EF2493	2	2418663	4	ArgR	aagtataaattta	2418838	3
EF2505	NoCOG			EF2505	EF2505	1	2433487	5	LysR	aaaaatgaaacaattgattaattt	2433535	3
EF2507	NoCOG			EF2507	EF2507	1	2434994	5	CRP-FNR	cttgattagcatcaaaat	2435172	2
EF2518	NoCOG			EF2518	EF2518	1	2444117	5	LysR	ttattataaaataaagctatattt	2444053	1
EF2558	[P] cation transporter			EF2558	EF2558	1	2470996	2	CRP-FNR	agtgaacacattcacata	2470712	1
EF2559	[C] pyruvate flavodoxin/ferredoxin oxidoreductase family protein			EF2559-EF2562	EF2562	4	2478766	3	ArgR	tgcattcaaatgc	2478804	8
EF2559	[C] pyruvate flavodoxin/ferredoxin oxidoreductase family protein			EF2559-EF2562	EF2562	4	2478766	3	CRP-FNR	tgtgtttccagtcatact	2478722	8
EF2560	[ER] glutamate synthase (NADPH), homotetrameric	gltA	1.4.1.13	EF2559-EF2562	EF2562	4	2478766	3	ArgR	tgcattcaaatgc	2478804	8
EF2560	[ER] glutamate synthase (NADPH), homotetrameric	gltA	1.4.1.13	EF2559-EF2562	EF2562	4	2478766	3	CRP-FNR	tgtgtttccagtcatact	2478722	8
EF2561	[HC] dihydroorotate dehydrogenase electron transfer subunit, putative			EF2559-EF2562	EF2562	4	2478766	3	ArgR	tgcattcaaatgc	2478804	8
EF2561	[HC] dihydroorotate dehydrogenase electron transfer subunit, putative			EF2559-EF2562	EF2562	4	2478766	3	CRP-FNR	tgtgtttccagtcatact	2478722	8
EF2562	[C] flavodoxin			EF2559-EF2562	EF2562	4	2478766	3	ArgR	tgcattcaaatgc	2478804	8
EF2562	[C] flavodoxin			EF2559-EF2562	EF2562	4	2478766	3	CRP-FNR	tgtgtttccagtcatact	2478722	8
EF2563	NoCOG			EF2563-EF2572	EF2572	10	2488278	3	LysR	aagttccgatctgtttttaatttt	2488232	1						down
EF2564	NoCOG			EF2563-EF2572	EF2572	10	2488278	3	LysR	aagttccgatctgtttttaatttt	2488232	1						down
EF2565	NoCOG			EF2563-EF2572	EF2572	10	2488278	3	LysR	aagttccgatctgtttttaatttt	2488232	1						down
EF2566	[O] hypothetical protein			EF2563-EF2572	EF2572	10	2488278	3	LysR	aagttccgatctgtttttaatttt	2488232	1						down
EF2567	[E] selenide, water dikinase	selD	2.7.9.3	EF2563-EF2572	EF2572	10	2488278	3	LysR	aagttccgatctgtttttaatttt	2488232	1						down
EF2568	[E] aminotransferase, class V			EF2563-EF2572	EF2572	10	2488278	3	LysR	aagttccgatctgtttttaatttt	2488232	1						down
EF2569	[R] hypothetical protein			EF2563-EF2572	EF2572	10	2488278	3	LysR	aagttccgatctgtttttaatttt	2488232	1						down
EF2570	[C] aldehyde oxidoreductase, putative			EF2563-EF2572	EF2572	10	2488278	3	LysR	aagttccgatctgtttttaatttt	2488232	1						down
EF2571	[O] hypothetical protein			EF2563-EF2572	EF2572	10	2488278	3	LysR	aagttccgatctgtttttaatttt	2488232	1						down
EF2572	[R] molybdenum transport domain protein			EF2563-EF2572	EF2572	10	2488278	3	LysR	aagttccgatctgtttttaatttt	2488232	1						down
EF2597	NoCOG			EF2597-EF2599	EF2599	3	2519269	3	LysR	aaaaaatatttttatttatttttt	2519421	6						down
EF2598	[G] PTS system, beta-glucoside-specific IIABC component			EF2597-EF2599	EF2599	3	2519269	3	LysR	aaaaaatatttttatttatttttt	2519421	6						down
EF2599	[K] transcriptional antiterminator, bglG family			EF2597-EF2599	EF2599	3	2519269	3	LysR	aaaaaatatttttatttatttttt	2519421	6						down
EF2601	[I] acyl carrier protein, putative			EF2601	EF2601	1	2519570	3	LysR	aaaaaatatttttatttatttttt	2519421	6
EF2602	[R] hypothetical protein			EF2602-EF2603	EF2603	2	2521812	5	ArgR	aaatagatattca	2521852	8						up
EF2603	NoCOG		2.7.1.69	EF2602-EF2603	EF2603	2	2521812	5	ArgR	aaatagatattca	2521852	8						up
EF2607	NoCOG	atpC	3.6.3.14	EF2607-EF2614	EF2614	8	2530558	3	ArgR	agaataaatttacatt	2530844	8		up
EF2607	NoCOG	atpC	3.6.3.14	EF2607-EF2614	EF2614	8	2530558	3	LysR	aaaaatgaatcatttacattcatt	2530760	8		up
EF2608	[C] ATP synthase subunit B	atpD	3.6.3.14	EF2607-EF2614	EF2614	8	2530558	3	ArgR	agaataaatttacatt	2530844	8		up
EF2608	[C] ATP synthase subunit B	atpD	3.6.3.14	EF2607-EF2614	EF2614	8	2530558	3	LysR	aaaaatgaatcatttacattcatt	2530760	8		up
EF2609	[C] ATP synthase subunit C	atpG	3.6.3.14	EF2607-EF2614	EF2614	8	2530558	3	ArgR	agaataaatttacatt	2530844	8		up
EF2609	[C] ATP synthase subunit C	atpG	3.6.3.14	EF2607-EF2614	EF2614	8	2530558	3	LysR	aaaaatgaatcatttacattcatt	2530760	8		up
EF2610	[C] ATP synthase subunit A	atpA	3.6.3.14	EF2607-EF2614	EF2614	8	2530558	3	ArgR	agaataaatttacatt	2530844	8		up
EF2610	[C] ATP synthase subunit A	atpA	3.6.3.14	EF2607-EF2614	EF2614	8	2530558	3	LysR	aaaaatgaatcatttacattcatt	2530760	8		up
EF2611	[C] ATP synthase F1, delta subunit	atpH	3.6.3.14	EF2607-EF2614	EF2614	8	2530558	3	ArgR	agaataaatttacatt	2530844	8		up
EF2611	[C] ATP synthase F1, delta subunit	atpH	3.6.3.14	EF2607-EF2614	EF2614	8	2530558	3	LysR	aaaaatgaatcatttacattcatt	2530760	8		up
EF2612	[C] ATP synthase F0, B subunit	atpF	3.6.3.14	EF2607-EF2614	EF2614	8	2530558	3	ArgR	agaataaatttacatt	2530844	8		up
EF2612	[C] ATP synthase F0, B subunit	atpF	3.6.3.14	EF2607-EF2614	EF2614	8	2530558	3	LysR	aaaaatgaatcatttacattcatt	2530760	8		up
EF2613	[C] ATP synthase F0, C subunit	atpE	3.6.3.14	EF2607-EF2614	EF2614	8	2530558	3	ArgR	agaataaatttacatt	2530844	8		up
EF2613	[C] ATP synthase F0, C subunit	atpE	3.6.3.14	EF2607-EF2614	EF2614	8	2530558	3	LysR	aaaaatgaatcatttacattcatt	2530760	8		up
EF2614	NoCOG	atpB	3.6.3.14	EF2607-EF2614	EF2614	8	2530558	3	ArgR	agaataaatttacatt	2530844	8		up
EF2614	NoCOG	atpB	3.6.3.14	EF2607-EF2614	EF2614	8	2530558	3	LysR	aaaaatgaatcatttacattcatt	2530760	8		up
EF2615	NoCOG			EF2615	EF2615	1	2530782	5	ArgR	agaataaatttacatt	2530844	1
EF2615	NoCOG			EF2615	EF2615	1	2530782	5	LysR	aaaaatgaatcatttacattcatt	2530760	1
EF2632	[L] IS256, transposase			EF2632	EF2632	1	2544006	1	ArgR	ataatttttatttata	2543749	1
EF2632	[L] IS256, transposase			EF2632	EF2632	1	2544006	1	LysR	atataataatttttatttatatt	2543744	1
EF2632	[L] IS256, transposase			EF2632	EF2632	1	2544006	1	PhoP	atttatattctatt	2543758	1
EF2654	[CR] alcohol dehydrogenase, zinc-containing			EF2654-EF2657	EF2654	4	2566355	4	LysR	aaaatttcaaccatttttctttat	2566193	8						down
EF2655	[H] hypothetical protein		6.3.2.5	EF2654-EF2657	EF2654	4	2566355	4	LysR	aaaatttcaaccatttttctttat	2566193	8						down
EF2656	[H] phosphopantothenoylcysteine synthase/decarboxylase		4.1.1.36	EF2654-EF2657	EF2654	4	2566355	4	LysR	aaaatttcaaccatttttctttat	2566193	8						down
EF2657	[S] hypothetical protein			EF2654-EF2657	EF2654	4	2566355	4	LysR	aaaatttcaaccatttttctttat	2566193	8						down
EF2658	[V] FemAB family protein			EF2658	EF2658	1	2570587	4	LysR	aaaaatgtagatcttattctttat	2570688	3
EF2661	[IR] diacylglycerol kinase catalytic domain protein			EF2661	EF2661	1	2571594	3	ArgR	tcaatgaacattc	2571591	5
EF2662	[R] choline binding protein			EF2662	EF2662	1	2573815	5	ArgR	aaatatttattca	2573869	4
EF2662	[R] choline binding protein			EF2662	EF2662	1	2573815	5	CRP-FNR	aatattgaatcaaataaa	2573950	4
EF2662	[R] choline binding protein			EF2662	EF2662	1	2573815	5	LysR	taaatatctgtaaaaaatatttat	2573855	4
EF2663	[L] helicase, putative, RecD/TraA family			EF2663-EF2664	EF2664	2	2577281	1	FruR	ttgattccattcagt	2577237	8
EF2664	[G] phosphoglycerate mutase family protein			EF2663-EF2664	EF2664	2	2577281	1	FruR	ttgattccattcagt	2577237	8
EF2679	[J] tryptophanyl-tRNA synthetase	trpS	6.1.1.2	EF2679	EF2679	1	2590296	1	LysR	aaaaaagtaatacagttttctatt	2590146	1						up
EF2681	[R] hydrolase, haloacid dehalogenase-like family			EF2681	EF2681	1	2593392	5	LysR	taaaaataactataattgtcttt	2593238	8
EF2694	[F] MTA/SAH nucleosidase	pfs	3.2.2.16	EF2694-EF2696	EF2696	3	2611700	5	CRP-FNR	taaaatgataaaaatcgc	2611722	8		down				up
EF2695	NoCOG			EF2694-EF2696	EF2696	3	2611700	5	CRP-FNR	taaaatgataaaaatcgc	2611722	8		down				up
EF2696	[LR] MutT/nudix family protein			EF2694-EF2696	EF2696	3	2611700	5	CRP-FNR	taaaatgataaaaatcgc	2611722	8		down				up
EF2699	NoCOG			EF2699-EF2700	EF2699	2	2614031	3	ArgR	ttgaaaaataaattat	2613946	2
EF2700	[F] MutT/nudix family protein			EF2699-EF2700	EF2699	2	2614031	3	ArgR	ttgaaaaataaattat	2613946	2
EF2704	[L] A/G-specific adenine glycosylase	mutY	3.2.2.-	EF2704-EF2705	EF2705	2	2619450	1	Fis	tctttaaaaattaaacg	2619618	8
EF2704	[L] A/G-specific adenine glycosylase	mutY	3.2.2.-	EF2704-EF2705	EF2705	2	2619450	1	LexA	gaacatatattc	2619476	8
EF2705	[R] regulatory protein RecX, putative			EF2704-EF2705	EF2705	2	2619450	1	Fis	tctttaaaaattaaacg	2619618	8
EF2705	[R] regulatory protein RecX, putative			EF2704-EF2705	EF2705	2	2619450	1	LexA	gaacatatattc	2619476	8
EF2706	[J] RNA methyltransferase, TrmA family			EF2706	EF2706	1	2619582	1	Fis	tctttaaaaattaaacg	2619618	7
EF2706	[J] RNA methyltransferase, TrmA family			EF2706	EF2706	1	2619582	1	LexA	gaacatatattc	2619476	7
EF2707	NoCOG			EF2707	EF2707	1	2621075	5	PhoP	aactaattaaacaat	2621133	1
EF2711	NoCOG			EF2711	EF2711	1	2626291	5	LysR	aaaaataaaaaatgttgcctattt	2626209	6					up
EF2721	[E] L-serine dehydratase, iron-sulfur-dependent, beta subunit	sdhB-2	4.2.1.13	EF2721-EF2722	EF2721	2	2633036	3	DeoR	tgttagacttcca	2632990	6
EF2722	[E] L-serine dehydratase, iron-sulfur-dependent, alpha subunit	sdhA-2	4.2.1.13	EF2721-EF2722	EF2721	2	2633036	3	DeoR	tgttagacttcca	2632990	6
EF2728	[R] lipoprotein, putative			EF2728	EF2728	1	2640023	5	Fis	agcttgtttattaatca	2640134	5						up
EF2729	[K] transcription antitermination protein NusG	nusG		EF2729-EF2731	EF2731	3	2641157	1	LysR	taaaatatctgatttttctttatt	2641310	8	up					up
EF2729	[K] transcription antitermination protein NusG	nusG		EF2729-EF2731	EF2731	3	2641157	1	PhoP	agttatgatatgataa	2641393	8	up					up
EF2730	[U] preprotein translocase, SecE subunit	secE		EF2729-EF2731	EF2731	3	2641157	1	LysR	taaaatatctgatttttctttatt	2641310	8	up					up
EF2730	[U] preprotein translocase, SecE subunit	secE		EF2729-EF2731	EF2731	3	2641157	1	PhoP	agttatgatatgataa	2641393	8	up					up
EF2731	[J] ribosomal protein L33	rpmG-2		EF2729-EF2731	EF2731	3	2641157	1	LysR	taaaatatctgatttttctttatt	2641310	8	up					up
EF2731	[J] ribosomal protein L33	rpmG-2		EF2729-EF2731	EF2731	3	2641157	1	PhoP	agttatgatatgataa	2641393	8	up					up
EF2732	[R] CBS domain protein			EF2732	EF2732	1	2641443	5	LysR	taaaatatctgatttttctttatt	2641310	3						down
EF2732	[R] CBS domain protein			EF2732	EF2732	1	2641443	5	PhoP	agttatgatatgataa	2641393	3						down
EF2733	[M] UDP-N-acetylenolpyruvoylglucosamine reductase	murB	1.1.1.158	EF2733-EF2734	EF2734	2	2644044	4	LysR	aaaaatcagtcattttctcttttt	2644100	8		down
EF2734	[R] oxidoreductase, Gfo/Idh/MocA family			EF2733-EF2734	EF2734	2	2644044	4	LysR	aaaaatcagtcattttctcttttt	2644100	8		down
EF2751	[V] permease protein, putative			EF2751-EF2752	EF2752	2	2661791	4	ArgR	ttcatattttttcaaa	2662055	7						up
EF2751	[V] permease protein, putative			EF2751-EF2752	EF2752	2	2661791	4	LysR	aattattatttaataattgttatt	2661921	7						up
EF2752	[V] ABC transporter, ATP-binding protein			EF2751-EF2752	EF2752	2	2661791	4	ArgR	ttcatattttttcaaa	2662055	7						up
EF2752	[V] ABC transporter, ATP-binding protein			EF2751-EF2752	EF2752	2	2661791	4	LysR	aattattatttaataattgttatt	2661921	7						up
EF2756	[L] DNA-damage-inducible protein P	dinP		EF2756	EF2756	1	2666172	1	LexA	gaacgtccgttc	2666203	7		up
EF2798	NoCOG			EF2798	EF2798	1	2701070	5	LysR	aataaaaataaaatatttgtgtct	2701225	1
EF2801	NoCOG			EF2801	EF2801	1	2703382	5	LysR	taaagttagttctttattattttt	2703335	1
EF2833	NoCOG			EF2833	EF2833	1	2724836	5	ArgR	atcaatatattttcat	2724664	1
EF2837	NoCOG			EF2837	EF2837	1	2727547	5	ArgR	ggctttaaaatgcgtt	2727582	1
EF2837	NoCOG			EF2837	EF2837	1	2727547	5	CRP-FNR	attcgctaaaaataacattt	2727667	1
EF2839	[L] DnaD domain protein			EF2839-EF2844	EF2844	6	2731770	5	ArgR	tcaataatcattc	2731739	3
EF2840	NoCOG			EF2839-EF2844	EF2844	6	2731770	5	ArgR	tcaataatcattc	2731739	3
EF2841	NoCOG			EF2839-EF2844	EF2844	6	2731770	5	ArgR	tcaataatcattc	2731739	3
EF2842	NoCOG			EF2839-EF2844	EF2844	6	2731770	5	ArgR	tcaataatcattc	2731739	3
EF2843	NoCOG			EF2839-EF2844	EF2844	6	2731770	5	ArgR	tcaataatcattc	2731739	3
EF2844	NoCOG			EF2839-EF2844	EF2844	6	2731770	5	ArgR	tcaataatcattc	2731739	3
EF2847	NoCOG			EF2847	EF2847	1	2732397	5	CRP-FNR	caacatgagctaaatcaa	2732430	1
EF2870	[H] HD domain protein			EF2870-EF2874	EF2874	5	2754182	5	ArgR	tgtattatactgcatt	2754271	8						up
EF2871	[H] nicotinic acid mononucleotide adenyltransferase	nadD		EF2870-EF2874	EF2874	5	2754182	5	ArgR	tgtattatactgcatt	2754271	8						up
EF2872	NoCOG			EF2870-EF2874	EF2874	5	2754182	5	ArgR	tgtattatactgcatt	2754271	8						up
EF2873	[R] GTPase of unknown function			EF2870-EF2874	EF2874	5	2754182	5	ArgR	tgtattatactgcatt	2754271	8						up
EF2874	[R] hydrolase, HAD subfamily IIIA			EF2870-EF2874	EF2874	5	2754182	5	ArgR	tgtattatactgcatt	2754271	8						up
EF2888	NoCOG			EF2888	EF2888	1	2764785	5	ArgR	ttaatttttattc	2764886	6						down
EF2889	[I] 2-hydroxy-3-oxopropionate reductase	glxR	1.1.1.60	EF2889	EF2889	1	2765776	3	LysR	aaattttactttaattttttttat	2765867	4						down
EF2894	[J] general stress protein 13, putative			EF2894	EF2894	1	2774878	1	ArgR	taattttaatgaa	2775067	8
EF2895	[E] aminotransferase, class II			EF2895	EF2895	1	2775062	3	ArgR	taattttaatgaa	2775067	5
EF2895	[E] aminotransferase, class II			EF2895	EF2895	1	2775062	3	PhoP	agttatcttatgttta	2775053	5
EF2903	[G] ABC transporter, substrate-binding protein			EF2903-EF2907	EF2907	5	2786592	3	LysR	aaaaataggtaaagttaatgtatt	2786703	7						down
EF2904	[R] hypothetical protein			EF2903-EF2907	EF2907	5	2786592	3	LysR	aaaaataggtaaagttaatgtatt	2786703	7						down
EF2905	[G] ABC transporter, permease protein			EF2903-EF2907	EF2907	5	2786592	3	LysR	aaaaataggtaaagttaatgtatt	2786703	7						down
EF2906	[G] ABC transporter, permease protein			EF2903-EF2907	EF2907	5	2786592	3	LysR	aaaaataggtaaagttaatgtatt	2786703	7						down
EF2907	[G] ABC transporter, ATP-binding protein			EF2903-EF2907	EF2907	5	2786592	3	LysR	aaaaataggtaaagttaatgtatt	2786703	7						down
EF2919	[V] ABC transporter, ATP-binding/permease protein			EF2919-EF2920	EF2920	2	2800180	4	LysR	aaaaaatagataattttaatgatt	2800313	8
EF2920	[V] ABC transporter, ATP-binding/permease protein			EF2919-EF2920	EF2920	2	2800180	4	LysR	aaaaaatagataattttaatgatt	2800313	8
EF2922	[S] hypothetical protein			EF2922	EF2922	1	2800409	5	LysR	aaaaaatagataattttaatgatt	2800313	1
EF2933	[R] redox-sensing transcriptional repressor Rex			EF2933	EF2933	1	2813862	5	CRP-FNR	ttgttacctacttcacat	2813875	1						down
EF2936	NoCOG			EF2936-EF2938	EF2938	3	2818141	5	Fur	ataatttgtaataattttaaatt	2818259	1
EF2937	NoCOG			EF2936-EF2938	EF2938	3	2818141	5	Fur	ataatttgtaataattttaaatt	2818259	1
EF2938	NoCOG			EF2936-EF2938	EF2938	3	2818141	5	Fur	ataatttgtaataattttaaatt	2818259	1
EF2945	NoCOG			EF2945	EF2945	1	2821297	5	LysR	taataaaaatcttttaaattcttt	2821311	1
EF2947	NoCOG			EF2947	EF2947	1	2822367	5	Fis	tgttgataatataagca	2822350	1
EF2970	NoCOG			EF2970	EF2970	1	2843104	5	ArgR	tgtttttttcttcatt	2843090	1		down
EF2970	NoCOG			EF2970	EF2970	1	2843104	5	LysR	taaaaaagtgaaaaacttttctat	2843141	1		down
EF2975	NoCOG			EF2975-EF2981	EF2981	7	2855692	3	PhoP	tttattatacattaaa	2855730	2
EF2976	[E] pyridoxal phosphate-dependent enzyme, putative			EF2975-EF2981	EF2981	7	2855692	3	PhoP	tttattatacattaaa	2855730	2
EF2977	NoCOG			EF2975-EF2981	EF2981	7	2855692	3	PhoP	tttattatacattaaa	2855730	2
EF2978	NoCOG		2.7.1.69	EF2975-EF2981	EF2981	7	2855692	3	PhoP	tttattatacattaaa	2855730	2
EF2979	NoCOG			EF2975-EF2981	EF2981	7	2855692	3	PhoP	tttattatacattaaa	2855730	2
EF2980	[G] PTS system, IIA component			EF2975-EF2981	EF2981	7	2855692	3	PhoP	tttattatacattaaa	2855730	2
EF2981	[K] sigma-54 dependent DNA-binding response regulator			EF2975-EF2981	EF2981	5	2855692	3	PhoP	tttattatacattaaa	2855730	2
EF2984	[TK] transcriptional regulator, putative			EF2984	EF2984	1	2858617	1	ArgR	cgaattaaaatttaga	2858706	1
EF2984	[TK] transcriptional regulator, putative			EF2984	EF2984	1	2858617	1	LysR	ttatttaaaaaatgtttgttattt	2858792	1
EF2991	[S] hypothetical protein			EF2991	EF2991	1	2864633	5	FruR	ctgaatcgtttacgc	2864657	4
EF2996	[R] hypothetical protein			EF2996-EF2997	EF2997	2	2871448	3	GalR-S	tgtaaacgtttcc	2871480	1						down
EF2997	[E] N-carbamoyl-L-amino acid amidohydrolase			EF2996-EF2997	EF2997	2	2871448	3	GalR-S	tgtaaacgtttcc	2871480	1						down
EF3000	[FH] cytosine/purines, uracil, thiamine, allantoin permease family protein			EF3000	EF3000	1	2874491	3	LysR	tttttattaaaaaattttttctat	2874504	3
EF3001	NoCOG			EF3001-EF3002	EF3002	2	2876069	1	LysR	ataaaataattatttcttttgtt	2876189	5	down	down
EF3002	[K] transcriptional regulator, MarR family			EF3001-EF3002	EF3002	2	2876069	1	LysR	ataaaataattatttcttttgtt	2876189	5	down	down
EF3005	[M] choloylglycine hydrolase family protein			EF3005	EF3005	1	2878956	4	CRP-FNR	ttgtgaaggaaatcgcta	2878805	7
EF3005	[M] choloylglycine hydrolase family protein			EF3005	EF3005	1	2878956	4	Fis	tgtctaatattttagga	2878854	7
EF3016	NoCOG			EF3016	EF3016	1	2895017	5	LysR	aaaatttatttttttgttatttat	2895104	1
EF3022	[C] sodium:dicarboxylate symporter family protein			EF3022	EF3022	1	2900293	3	FruR	cttaatcaatttatt	2900264	1
EF3023	[N] polysaccharide lyase, family 8			EF3023	EF3023	1	2905870	2	CRP-FNR	attatttttttaatcata	2905854	3
EF3025	[S] conserved hypothetical protein TIGR00246			EF3025	EF3025	1	2906933	5	DnaA	ttatccac	2907116	8
EF3027	[O] serine protease DO	htrA	3.4.21.-	EF3027	EF3027	1	2907334	4	DnaA	ttatccac	2907116	8					up	down
EF3036	[OC] thioredoxin family protein			EF3036-EF3037	EF3037	2	2915499	4	LysR	atgattgaaaaactttttttattt	2915696	8
EF3037	[G] glutamyl-aminopeptidase	pepA	3.4.11.7	EF3036-EF3037	EF3037	2	2915499	4	LysR	atgattgaaaaactttttttattt	2915696	8
EF3041	[E] pheromone binding protein			EF3041	EF3041	1	2916466	3	LysR	ataaaaaagattagacatttttta	2916339	8
EF3042	NoCOG			EF3042-EF3044	EF3044	3	2920945	5	ArgR	tgaataatcattc	2920935	5
EF3043	NoCOG		2.7.1.69	EF3042-EF3044	EF3044	3	2920945	5	ArgR	tgaataatcattc	2920935	5
EF3044	[G] N-acetylglucosamine-6-phosphate deacetylase	nagA-2	3.5.1.25	EF3042-EF3044	EF3044	3	2920945	5	ArgR	tgaataatcattc	2920935	5
EF3051	NoCOG			EF3051	EF3051	1	2926434	5	CRP-FNR	tcttgaattttatcacaa	2926573	1
EF3051	NoCOG			EF3051	EF3051	1	2926434	5	LexA	gaacatattttc	2926563	1
EF3052	NoCOG			EF3052	EF3052	1	2926660	5	CRP-FNR	tcttgaattttatcacaa	2926573	1						up
EF3052	NoCOG			EF3052	EF3052	1	2926660	5	LexA	gaacatattttc	2926563	1						up
EF3056	[M] sortase family protein			EF3056	EF3056	1	2929629	4	FruR	atcaatcgattcagt	2929506	8
EF3060	[S] secreted lipase, putative			EF3060	EF3060	1	2933436	5	LysR	taaaatttgaataaatttctcttt	2933486	4		up
EF3061	[M] rod shape-determining protein MreD	mreD		EF3061-EF3062	EF3062	2	2935107	4	CRP-FNR	atttttatttggattaaa	2935081	6						down
EF3061	[M] rod shape-determining protein MreD	mreD		EF3061-EF3062	EF3062	2	2935107	4	LysR	actaaaattaaggtaatgattata	2935058	6						down
EF3062	[M] rod shape-determining protein MreC	mreC		EF3061-EF3062	EF3062	2	2935107	4	CRP-FNR	atttttatttggattaaa	2935081	6						down
EF3062	[M] rod shape-determining protein MreC	mreC		EF3061-EF3062	EF3062	2	2935107	4	LysR	actaaaattaaggtaatgattata	2935058	6						down
EF3063	NoCOG			EF3063	EF3063	1	2935040	5	CRP-FNR	atttttatttggattaaa	2935081	1
EF3063	NoCOG			EF3063	EF3063	1	2935040	5	LysR	actaaaattaaggtaatgattata	2935058	1
EF3066	NoCOG	def	3.5.1.88	EF3066	EF3066	1	2938139	5	LysR	ataaaagaagaatttttttatgtt	2938096	8						up
EF3082	[P] iron compound ABC transporter, substrate-binding protein			EF3082-EF3085	EF3085	4	2961138	2	Fur	attgagaatgattctcattctta	2961161	3		up			up	up
EF3083	[P] iron compound ABC transporter, ATP-binding protein			EF3082-EF3085	EF3085	4	2961138	2	Fur	attgagaatgattctcattctta	2961161	3		up			up	up
EF3084	[P] iron compound ABC transporter, permease protein			EF3082-EF3085	EF3085	4	2961138	2	Fur	attgagaatgattctcattctta	2961161	3		up			up	up
EF3085	[P] iron compound ABC transporter, permease protein			EF3082-EF3085	EF3085	4	2961138	2	Fur	attgagaatgattctcattctta	2961161	3		up			up	up
EF3086	[S] hypothetical protein			EF3086	EF3086	1	2961323	5	CRP-FNR	tgagaaaaccatcacaaa	2961195	7
EF3092	[R] glyoxalase family protein			EF3092	EF3092	1	2967530	5	FruR	ctgaatgatttcact	2967677	2
EF3092	[R] glyoxalase family protein			EF3092	EF3092	1	2967530	5	MalI	aaaacgtttt	2967639	2
EF3100	[L] IS256, transposase			EF3100	EF3100	1	2975706	1	LysR	aaaaataatgaacacttttctttt	2975512	1
EF3101	NoCOG			EF3101-EF3103	EF3103	3	2978672	5	DeoR	tggtacaattcta	2978646	1						down
EF3102	NoCOG			EF3101-EF3103	EF3103	3	2978672	5	DeoR	tggtacaattcta	2978646	1						down
EF3103	NoCOG			EF3101-EF3103	EF3103	3	2978672	5	DeoR	tggtacaattcta	2978646	1						down
EF3110	[EP] peptide ABC transporter, ATP-binding protein			EF3110	EF3110	1	2985833	3	ArgR	tcaatgttaattt	2985912	4
EF3110	[EP] peptide ABC transporter, ATP-binding protein			EF3110	EF3110	1	2985833	3	PhoP	aatttatataatgttt	2985861	4
EF3133	NoCOG			EF3133	EF3133	1	3008037	5	ArgR	tcactaattatac	3008079	6
EF3134	[G] 2-dehydro-3-deoxyphosphogluconate aldolase/4-hydroxy-2-oxoglutarate aldolase	eda-2		EF3134-EF3142	EF3142	9	3015941	3	GalR-S	tgtaaacgattac	3015996	4						down
EF3134	[G] 2-dehydro-3-deoxyphosphogluconate aldolase/4-hydroxy-2-oxoglutarate aldolase	eda-2		EF3134-EF3142	EF3142	9	3015941	3	LysR	aaaaagattatttatttttttttg	3016191	4						down
EF3134	[G] 2-dehydro-3-deoxyphosphogluconate aldolase/4-hydroxy-2-oxoglutarate aldolase	eda-2		EF3134-EF3142	EF3142	9	3015941	3	MalI	aaaacgtttt	3016064	4						down
EF3135	[G] mannonate dehydratase			EF3134-EF3142	EF3142	9	3015941	3	GalR-S	tgtaaacgattac	3015996	4						down
EF3135	[G] mannonate dehydratase			EF3134-EF3142	EF3142	9	3015941	3	LysR	aaaaagattatttatttttttttg	3016191	4						down
EF3135	[G] mannonate dehydratase			EF3134-EF3142	EF3142	9	3015941	3	MalI	aaaacgtttt	3016064	4						down
EF3136	[G] PTS system, IIA component			EF3134-EF3142	EF3142	9	3015941	3	GalR-S	tgtaaacgattac	3015996	4						down
EF3136	[G] PTS system, IIA component			EF3134-EF3142	EF3142	9	3015941	3	LysR	aaaaagattatttatttttttttg	3016191	4						down
EF3136	[G] PTS system, IIA component			EF3134-EF3142	EF3142	9	3015941	3	MalI	aaaacgtttt	3016064	4						down
EF3137	NoCOG			EF3134-EF3142	EF3142	9	3015941	3	GalR-S	tgtaaacgattac	3015996	4						down
EF3137	NoCOG			EF3134-EF3142	EF3142	9	3015941	3	LysR	aaaaagattatttatttttttttg	3016191	4						down
EF3137	NoCOG			EF3134-EF3142	EF3142	9	3015941	3	MalI	aaaacgtttt	3016064	4						down
EF3138	NoCOG			EF3134-EF3142	EF3142	9	3015941	3	GalR-S	tgtaaacgattac	3015996	4						down
EF3138	NoCOG			EF3134-EF3142	EF3142	9	3015941	3	LysR	aaaaagattatttatttttttttg	3016191	4						down
EF3138	NoCOG			EF3134-EF3142	EF3142	9	3015941	3	MalI	aaaacgtttt	3016064	4						down
EF3139	NoCOG			EF3134-EF3142	EF3142	9	3015941	3	GalR-S	tgtaaacgattac	3015996	4						down
EF3139	NoCOG			EF3134-EF3142	EF3142	9	3015941	3	LysR	aaaaagattatttatttttttttg	3016191	4						down
EF3139	NoCOG			EF3134-EF3142	EF3142	9	3015941	3	MalI	aaaacgtttt	3016064	4						down
EF3140	[C] alcohol dehydrogenase, iron-containing			EF3134-EF3142	EF3142	9	3015941	3	GalR-S	tgtaaacgattac	3015996	4						down
EF3140	[C] alcohol dehydrogenase, iron-containing			EF3134-EF3142	EF3142	9	3015941	3	LysR	aaaaagattatttatttttttttg	3016191	4						down
EF3140	[C] alcohol dehydrogenase, iron-containing			EF3134-EF3142	EF3142	9	3015941	3	MalI	aaaacgtttt	3016064	4						down
EF3141	[HE] D-isomer specific 2-hydroxyacid dehydrogenase family protein			EF3134-EF3142	EF3142	9	3015941	3	GalR-S	tgtaaacgattac	3015996	4						down
EF3141	[HE] D-isomer specific 2-hydroxyacid dehydrogenase family protein			EF3134-EF3142	EF3142	9	3015941	3	LysR	aaaaagattatttatttttttttg	3016191	4						down
EF3141	[HE] D-isomer specific 2-hydroxyacid dehydrogenase family protein			EF3134-EF3142	EF3142	9	3015941	3	MalI	aaaacgtttt	3016064	4						down
EF3142	[G] 6-phosphogluconate dehydrogenase			EF3134-EF3142	EF3142	9	3015941	3	GalR-S	tgtaaacgattac	3015996	4						down
EF3142	[G] 6-phosphogluconate dehydrogenase			EF3134-EF3142	EF3142	9	3015941	3	LysR	aaaaagattatttatttttttttg	3016191	4						down
EF3142	[G] 6-phosphogluconate dehydrogenase			EF3134-EF3142	EF3142	9	3015941	3	MalI	aaaacgtttt	3016064	4						down
EF3144	[K] phosphosugar-binding transcriptional regulator, RpiR family			EF3144	EF3144	1	3016354	1	LysR	aaaaagattatttatttttttttg	3016191	5						up
EF3144	[K] phosphosugar-binding transcriptional regulator, RpiR family			EF3144	EF3144	1	3016354	1	MalI	aaaacgtttt	3016064	5						up
EF3145	NoCOG			EF3145	EF3145	1	3017827	5	LysR	aaaaatgttcataattcataattt	3017782	1
EF3166	[L] DNA mismatch repair protein	hexB		EF3166-EF3172	EF3172	7	3046875	1	ArgR	ttaattattacgaaaa	3046991	8
EF3166	[L] DNA mismatch repair protein	hexB		EF3166-EF3172	EF3172	7	3046875	1	CRP-FNR	aaaatgttcattttctcaca	3047006	8
EF3166	[L] DNA mismatch repair protein	hexB		EF3166-EF3172	EF3172	7	3046875	1	LexA	gaacaaacattc	3046900	8		up				up
EF3167	[L] DNA mismatch repair protein	hexA		EF3166-EF3172	EF3172	7	3046875	1	ArgR	ttaattattacgaaaa	3046991	8
EF3167	[L] DNA mismatch repair protein	hexA		EF3166-EF3172	EF3172	7	3046875	1	CRP-FNR	aaaatgttcattttctcaca	3047006	8
EF3167	[L] DNA mismatch repair protein	hexA		EF3166-EF3172	EF3172	7	3046875	1	LexA	gaacaaacattc	3046900	8		up				up
EF3168	NoCOG			EF3166-EF3172	EF3172	7	3046875	1	ArgR	ttaattattacgaaaa	3046991	8
EF3168	NoCOG			EF3166-EF3172	EF3172	7	3046875	1	CRP-FNR	aaaatgttcattttctcaca	3047006	8
EF3168	NoCOG			EF3166-EF3172	EF3172	7	3046875	1	LexA	gaacaaacattc	3046900	8		up				up
EF3169	[S] conserved hypothetical protein TIGR00282			EF3166-EF3172	EF3172	7	3046875	1	ArgR	ttaattattacgaaaa	3046991	8
EF3169	[S] conserved hypothetical protein TIGR00282			EF3166-EF3172	EF3172	7	3046875	1	CRP-FNR	aaaatgttcattttctcaca	3047006	8
EF3169	[S] conserved hypothetical protein TIGR00282			EF3166-EF3172	EF3172	7	3046875	1	LexA	gaacaaacattc	3046900	8		up				up
EF3170	[R] HD/KH domain protein			EF3166-EF3172	EF3172	7	3046875	1	ArgR	ttaattattacgaaaa	3046991	8
EF3170	[R] HD/KH domain protein			EF3166-EF3172	EF3172	7	3046875	1	CRP-FNR	aaaatgttcattttctcaca	3047006	8
EF3170	[R] HD/KH domain protein			EF3166-EF3172	EF3172	7	3046875	1	LexA	gaacaaacattc	3046900	8		up				up
EF3171	[L] recombinase A	recA		EF3166-EF3172	EF3172	7	3046875	1	ArgR	ttaattattacgaaaa	3046991	8
EF3171	[L] recombinase A	recA		EF3166-EF3172	EF3172	7	3046875	1	CRP-FNR	aaaatgttcattttctcaca	3047006	8
EF3171	[L] recombinase A	recA		EF3166-EF3172	EF3172	7	3046875	1	LexA	gaacaaacattc	3046900	8		up				up
EF3172	[R] competence/damage-inducible protein CinA	cinA		EF3166-EF3172	EF3172	7	3046875	1	ArgR	ttaattattacgaaaa	3046991	8
EF3172	[R] competence/damage-inducible protein CinA	cinA		EF3166-EF3172	EF3172	7	3046875	1	CRP-FNR	aaaatgttcattttctcaca	3047006	8
EF3172	[R] competence/damage-inducible protein CinA	cinA		EF3166-EF3172	EF3172	7	3046875	1	LexA	gaacaaacattc	3046900	8		up				up
EF3173	NoCOG			EF3173	EF3173	1	3047067	5	ArgR	ttaattattacgaaaa	3046991	2		down
EF3173	NoCOG			EF3173	EF3173	1	3047067	5	CRP-FNR	aaaatgttcattttctcaca	3047006	2		down			up
EF3178	[E] hypothetical protein			EF3178	EF3178	1	3052080	3	LysR	aaatactaattttttctgattttt	3052053	4
EF3179	NoCOG			EF3179-EF3180	EF3180	2	3053616	1	LysR	aacttttttattatttttaatttt	3053679	1						down
EF3180	[K] RNA polymerase sigma-70 factor, ECF subfamily			EF3179-EF3180	EF3180	2	3053616	1	LysR	aacttttttattatttttaatttt	3053679	1						down
EF3184	NoCOG			EF3184-EF3188	EF3188	5	3064276	5	LysR	aaaaaaaaaatttattttttaat	3064566	4						down
EF3185	NoCOG			EF3184-EF3188	EF3188	5	3064276	5	LysR	aaaaaaaaaatttattttttaat	3064566	4						down
EF3186	NoCOG			EF3184-EF3188	EF3188	5	3064276	5	LysR	aaaaaaaaaatttattttttaat	3064566	4						down
EF3187	NoCOG			EF3184-EF3188	EF3188	5	3064276	5	LysR	aaaaaaaaaatttattttttaat	3064566	4						down
EF3188	NoCOG			EF3184-EF3188	EF3188	5	3064276	5	LysR	aaaaaaaaaatttattttttaat	3064566	4						down
EF3189	NoCOG			EF3189	EF3189	1	3064517	5	CRP-FNR	atgttaatttgttcacaa	3064638	1
EF3189	NoCOG			EF3189	EF3189	1	3064517	5	LysR	aaaaaaaaaatttattttttaat	3064566	1
EF3198	[P] lipoprotein, YaeC family			EF3198-EF3200	EF3200	3	3072809	2	LysR	aaaaaaaagcaacctttttatttg	3072983	2					up	up
EF3199	[P] ABC transporter, permease protein			EF3198-EF3200	EF3200	3	3072809	2	LysR	aaaaaaaagcaacctttttatttg	3072983	2					up	up
EF3200	[P] ABC transporter, ATP-binding protein			EF3198-EF3200	EF3200	3	3072809	2	LysR	aaaaaaaagcaacctttttatttg	3072983	2					up	up
EF3206	[R] adhesion lipoprotein			EF3203-EF3206	EF3203	4	3074150	5	Fur	taaatcgtaatggttaacgatttg	3074170	8
EF3220	NoCOG			EF3220	EF3220	1	3094640	5	ArgR	tttatatttattcttt	3094775	1
EF3220	NoCOG			EF3220	EF3220	1	3094640	5	LysR	aaaaatcaaatagttcgctttata	3094678	1
EF3242	[R] abortive phage resistance protein, putative			EF3242	EF3242	1	3116162	5	LysR	tttaaaaaacaataaattttctt	3116291	2
EF3242	[R] abortive phage resistance protein, putative			EF3242	EF3242	1	3116162	5	MalI	aaaacgtttt	3116224	2
EF3243	NoCOG			EF3243	EF3243	1	3116322	5	LysR	tttaaaaaacaataaattttctt	3116291	1
EF3244	NoCOG			EF3244-EF3245	EF3244	2	3116497	3	LysR	tttaaaaaacaataaattttctt	3116291	1	up	up
EF3244	NoCOG			EF3244-EF3245	EF3244	2	3116497	3	MalI	aaaacgtttt	3116224	1
EF3245	[I] cell-envelope associated acid phosphatase			EF3244-EF3245	EF3244	2	3116497	3	LysR	tttaaaaaacaataaattttctt	3116291	1	up	up
EF3245	[I] cell-envelope associated acid phosphatase			EF3244-EF3245	EF3244	2	3116497	3	MalI	aaaacgtttt	3116224	1
EF3247	NoCOG			EF3247	EF3247	1	3118749	5	LysR	tatattgaaaactaattatttttt	3118705	1
EF3256	[S] pheromone cAD1 precursor lipoprotein			EF3256	EF3256	1	3134839	5	CRP-FNR	tgtgatacattacacatt	3134885	3					down	down
EF3263	NoCOG			EF3263	EF3263	1	3140462	5	CRP-FNR	tgtgtagtataacacatt	3140554	1
EF3287	NoCOG			EF3287	EF3287	1	3170486	5	LysR	aaaatatggaaaagagatttttta	3170665	1					down
EF3293	[F] inositol-5-monophosphate dehydrogenase	guaB	1.1.1.205	EF3293	EF3293	1	3175870	3	ArgR	tgtttaaataatcaat	3175942	8		up
EF3303	[S] hypothetical protein			EF3303	EF3303	1	3186091	5	Fis	tgtctaatttttaagca	3186197	6					up
EF3303	[S] hypothetical protein			EF3303	EF3303	1	3186091	5	LysR	acaaataaagaaaattgtctaatt	3186182	6					up
EF3314	NoCOG			EF3314	EF3314	1	3201058	5	ArgR	tatataaaaattc	3201165	3
EF3314	NoCOG			EF3314	EF3314	1	3201058	5	CRP-FNR	atgttaaaaaactcactaat	3201201	3
EF3317	[C] oxaloacetate decarboxylase			EF3317-EF3326	EF3326	10	3211681	3	LysR	tattaatattatattaagttatta	3211842	4					down
EF3318	[HI]	citX		EF3317-EF3326	EF3326	10	3211681	3	LysR	tattaatattatattaagttatta	3211842	4					down
EF3319	[C] citrate lyase, alpha subunit	citF	4.1.3.6	EF3317-EF3326	EF3326	10	3211681	3	LysR	tattaatattatattaagttatta	3211842	4					down
EF3320	[G] citrate lyase, beta subunit	citE	4.1.3.6	EF3317-EF3326	EF3326	10	3211681	3	LysR	tattaatattatattaagttatta	3211842	4					down
EF3321	[C] citrate lyase, gamma subunit	citD	4.1.3.6	EF3317-EF3326	EF3326	10	3211681	3	LysR	tattaatattatattaagttatta	3211842	4					down
EF3322	[C] citrate lyase ligase	citC	6.2.1.22	EF3317-EF3326	EF3326	10	3211681	3	LysR	tattaatattatattaagttatta	3211842	4					down
EF3323	NoCOG			EF3317-EF3326	EF3326	10	3211681	3	LysR	tattaatattatattaagttatta	3211842	4					down
EF3324	NoCOG			EF3317-EF3326	EF3326	10	3211681	3	LysR	tattaatattatattaagttatta	3211842	4					down
EF3325	[I] acetyl-CoA carboxylase			EF3317-EF3326	EF3326	10	3211681	3	LysR	tattaatattatattaagttatta	3211842	4					down
EF3326	NoCOG			EF3317-EF3326	EF3326	10	3211681	3	LysR	tattaatattatattaagttatta	3211842	4					down
EF3329	[TK] DNA-binding response regulator			EF3329	EF3329	1	3215077	1	CRP-FNR	attactgattatcataac	3215139	1						up
EF3330	[R] jag protein, putative			EF3330-EF3333	EF3333	4	3217567	4	DnaA	ttatccac	3217693	8						up
EF3331	[U] pheromone cCF10 percursor/lipoprotein, 60 kDa			EF3330-EF3333	EF3333	4	3217567	4	DnaA	ttatccac	3217693	8						up
EF3332	[J] ribonuclease P	rnpA	3.1.26.5	EF3330-EF3333	EF3333	4	3217567	4	DnaA	ttatccac	3217693	8						up
EF3333	NoCOG	rpmH		EF3330-EF3333	EF3333	4	3217567	4	DnaA	ttatccac	3217693	8						up
EF1209	[T] sensory box histidine kinase			EF1209-EF1210	EF1209	2	1174215	2	PurR	gtaaacgttttct	1174108	3
EF1210	[KT] response regulator			EF1209-EF1210	EF1209	2	1174215	2	PurR	gtaaacgttttct	1174108	3
* Enterococcus faecalis V583 strain (NCBI genome code NC_004668.1)
1. COG Operon	number
Replication, transcription, translation	1
Transport and signaling	2
Basal metabolism and energy production	3
Other functions	4
Hypothetical proteins	5
2. Transcription factor family	Gen ID
AbrB	EF3261
Ada	EF0277, EF0275
AraC	EF0432, EF0437, EF0530, EF0962, EF1357, EF1591, EF2063, EF2218, EF2711
AraR	EF1709, EF2962, EF2238
ArcA	EF1193, EF1703, EF0104
ArgR	EF0676, EF0983, EF0102, EF0103, EF1982
BirA	EF3240
CopY	EF0297
CRP-FNR	EF1940, EF0107, EF0074
DeoR	EF0657, EF0719, EF1124, EF1965
DnaA	EF0001
Fis	EF2207
FruR	EF1604
Fur	EF1585, EF1525, EF2417
GalR-S	EF1741, EF1240, EF0654, EF1072, EF1922
GntR	EF0117, EF0301, EF0814, EF1242, EF1328, EF1676, \EF2051, EF2273, EF2426, EF2640, EF3034
LexA	EF1579
LysR	EF2958, EF1656, EF1303, EF1710, EF0644, EF1815, EF0923
MalI	EF0172
PhoP	EF3289, EF0372, EF1260, EF1050, EF0926, EF2299, EF3329, EF1864
PurR	EF0954, EF1410, EF0058
3. Homology order	number
Unique (only E. faecalis)	1
Low conservation (2-3 species)	2,3
Medium conservation (4-6 species)	4,5,6
High conservation (7-8 species)	7,8

## Sheet: Supplementary Table 2
Supplementary Table 2: Differentially expressed genes in the copΔ mutant versus the wild type without copper added. The table shows the expression ratio of the E. faecalis copΔ strain related to OG1RF grown only in N medium (basal condition).
Gene information		Microarray data (log2 fold-change cop∆+Cu / cop∆)1		Global transcriptional regulatory network
Gene	COG functional classification	replicate 1	replicate 2	Transcriptional factor family	BS sequence
EF0289	[E] cystathionine beta-lyase	2.207	2.22	No TF	No BS
EF3145	[NoCOG] hypothetical protein	2.133	2.126	LysR	aaaaatgttcataattcataattt
EF3244	[I] cell-envelope associated acid phosphatase	2.076	2.097	LysR	tttaaatttatttaaaaaacaata
1. Microarray cop∆ data: Values indicate the average of two hybridization replicates (Student’s t-test P < 0.05, DNASTAR Array 5.0 software, data available NCBI-GEO database, accession number GSE45131).
Fold-change color significance
significantly down-regulated
significantly up-regulated

## Sheet: Supplementary Table 3
Supplementary Table 3: Microarray cop∆ data verification by qPCR assays.
					Microarray data (log2 fold-change cop∆+Cu / cop∆)1		qPCR data (log2 fold-change cop∆+Cu / cop∆)2
Operon ID	Gen ID (first gene operon)	COG Annotation	TF	BS	cop∆ 0.05 mM Cu	cop∆ 0.5 mM Cu	cop∆ 0.05 mM Cu	cop∆ 0.5 mM Cu
EF0050-EF0051	EF0050	NoCOG	Fis	tgaataaaaattcgaca		2.099 ± 0.14		3.32 ± 0.24
EF0100	EF0100	[J] seryl-tRNA synthetase	Fis	tgtttaaaatttaatca	2.101 ± 0.103		3.82 ± 0.11
EF0115	EF0115	[J] endoribonuclease L-PSP, putative	DeoR	tgttggaatgcta		2.38 ± 0.167		3.981 ± 0.09
EF0362	EF0362	[S] chitin binding protein, putative	GalR-S	tgtatgcgcttac		3.099 ± 0.217		3.39 ± 0.31
EF0720	EF0720	[P] voltage-gated chloride channel family protein	LysR	aagaaaaagattttttgttctttt		4.141 ± 0.233		5.312 ± 0.32
EF0731	EF0731	[K] transcriptional regulator, luxR family	ArgR, LysR	tgaatgatttttc, aataaaaaaatcggttgtttattt		5.444 ± 0.353		5.98 ± 0.34
EF0743	EF0743	NoCOG	GalR-S	tgcatacgcttac		2.139 ± 0.159		2.59 ± 0.39
EF0791	EF0791	[K] transcriptional regulator, TetR family	LysR	attgattgtatatttttcgttttt		2.555 ± 0.19		2.443 ± 0.25
EF0891-EF0893	EF0893	[E] aspartate aminotransferase	ArgR	gtataaaaattta		2.072 ± 0.136		2.15 ± 0.12
EF1012-EF1016	EF1012	[G] PTS system, IIB component	GalR-S	tgtaagcgttttc		3.482 ± 0.23		3.29 ± 0.12
EF1041	EF1041	[R] xanthine/uracil permeases family protein	LysR	aatatatatataatagttaatatt		6.172 ± 0.367		4.92 ± 0.37
EF1107-EF1110	EF1107	NoCOG	CRP-FNR	tttttgtgtgaaaatgcaca		4.502 ± 0.34		4.319 ± 0.23
EF1121-EF1123	EF1121	[M] glutamate racemase	LysR	tacaaaaaaatgaattactagttt		2.007 ± 0.135		2.50 ± 0.09
EF1262-EF1263	EF1263	[R] hypothetical protein	ArgR	atgaattaattatgaa		2.838 ± 0.21		2.838 ± 0.21
EF1531-EF1533	EF1531	[K] transcriptional regulator, TetR family	CRP-FNR	tttgtgtgaacataataaag		6.521 ± 0.368		5.951 ± 0.23
EF1596	EF1596	NoCOG	LysR	aataaaagggaattaattttttat		2.329 ± 0.166		2.21 ± 0.24
EF1615-EF1616	EF1616	[L] DNA topoisomerase IV subunit B	LysR	taaaatatcaaaaatttgattttg		2.109 ± 0.147		2.391 ± 0.09
EF1904	EF1904	[C] glycerophosphoryl diester phosphodiesterase family protein	Fis	tgattattttattagca		2.113 ± 0.149		2.23 ± 0.21
EF1958-EF1959	EF1959	[F] deoxyguanosinetriphosphate triphosphohydrolase	LysR	aaaataacaattattttgttttat	2.032 ± 0.113		2.05 ± 0.13
EF2430-EF2431	EF2431	[F] xanthine/uracil permease family protein	CRP-FNR, LysR	aatgtgatttttttaaaa, taactataaaaatgtgatttttt		2.736 ± 0.205		3.31 ± 0.11
EF2494-EF2495	EF2495	[I] phosphatidate cytidylyltransferase	CRP-FNR	tatcttaattattataac		3.264 ± 0.222		3.86 ± 0.19
EF2559-EF2562	EF2562	[C] pyruvate flavodoxin/ferredoxin oxidoreductase family protein	GalR-S, LysR	tgtaaccccttac, aaaataacttttacaaatgatttt	2.198 ± 0.115		2.912 ± 0.25
EF2678	EF2678	[P] hypothetical protein	LysR	aaaaaagtaatacagttttctatt	2.681 ± 0.102	5.47 ± 0.359	2.211 ± 0.12	4.47 ± 0.23
EF2703	EF2703	[K] transcriptional regulator	LysR	aaaagcctctcttttttgttattt		2.731 ± 0.197		2.231 ± 0.15
EF2708	EF2708	[S] membran protein, putative	LysR	aaaaagcaataatttctgataatt		2.424 ± 0.189		2.494 ± 0.09
EF2727	EF2727	[K] phosphosugar-binding transcriptional regulator, putative	LysR	aaaaacacctcatttttttatttt	2.122 ± 0.119		3.92 ± 0.19
EF2894	EF2894	[J] general stress protein 13, putative	PhoP	agttatcttatgttta		2.102 ± 0.144		4.102 ± 0.14
EF2910	EF2910	[P] potassium uptake protein	PhoP	atttatctgatattta		2.084 ± 0.137		2.641 ± 0.27
EF2985-EF2987	EF2987	[V] permease, putative	LysR	agaataaacgttttttgttatttt		2.417 ± 0.181		3.711 ± 0.21
EF3003	EF3003	NoCOG	LysR	ataaaataattatttcttttgtt		2.454 ± 0.191		2.24 ± 0.21
EF3004	EF3004	[P] sulfate transporter family/STAS domain protein	CRP-FNR, Fis	ttgtgaaggaaatcgcta, tgtctaatattttagga		2.691 ± 0.197		4.31 ± 0.29
EF3249	EF3249	NoCOG	LysR	tatattgaaaactaattatttttt		2.328 ± 0.162		2.528 ± 0.11
EF3257	EF3257	[C] oxidoreductase, pyridine nucleotide-disulfide family	CRP-FNR	tgtgatacattacacatt	2.024 ± 0.123		2.94 ± 0.23
EF3327	EF3327	[C] citrate transporter	GalR-S, LysR	tgttaacgcttac, tattaatattatattaagttatta		2.133 ± 0.158		3.33 ± 0.21
EF3328	EF3328	[K] transcriptional regulator, GntR family	LysR	attttcatttttaatattatattt		2.837 ± 0.205		3.837 ± 0.40
1. Microarray cop∆ data: Values indicate the average of two hybridization replicates (Student’s t-test P < 0.05, DNASTAR Array 5.0 software, data available NCBI-GEO database, accession number GSE45131).
2. qPCR data: Data analyses were performed as described previously in Latorre et al., Biochem Biophys Res Commun 2011, 406. 633-7. The gdh gene (EF1004) was used for normalization. In all of the cases, qPCR reactions were carried out in triplicate. The results were expressed as the fold change (log2) between copper-treated and control cultures (same microarray cDNA samples used as template). The …
Fold-change color significance
significantly down-regulated
significantly up-regulated

## Sheet: Supplementary Table 4
Supplementary Table 4: In vivo verification of in silico connectivity proposed in the E. faecalis transcriptional regulatory network.
CopY regulon induced by Cu (1 operon)
					Microarray data (log 2 fold-change WT+Cu / WT)1		qPCR data (log 2 fold-change mutant / WT)2
Operon ID	GENE ID	COG Annotation	TF	BS	WT 0.5 mM Cu		copY∆
EF0297-EF0299	EF0298	[P] copper-translocating P-type ATPase	CopY	aattacagatgcaga	4.608 ± 1.915		5.15 ± 1.51
EF0297-EF0299	EF0299	[P] copper transport protein CopZ	CopY	aattacagatgcaga	4.08 ± 1.152		4.62 ± 3.72
Fur regulon induced by Cu (4 operon)
					Microarray data (log 2 fold-change WT+Cu / WT)1		qPCR data (log 2 fold-change mutant / WT)2
Operon ID	GENE ID	COG Annotation	TF	BS	WT 0.5 mM Cu		fur∆
EF0188	EF0188	[P] iron compound ABC transporter, substrate-binding protein	Fur	agtgagaacgattctcaataaat	3.186 ± 0.318		3.13 ± 0.62
EF0191-EF0193	EF0191	[PH] ferrichrome ABC transporter, ATP-binding protein	Fur	agtgagaacgattctcaataaat	4.434 ± 0.192		5.51 ± 1.11
EF0191-EF0193	EF0192	[P] ferrichrome ABC transporter, permease protein	Fur	agtgagaacgattctcaataaat	5.425 ± 0.216		6.56 ± 1.01
EF0191-EF0193	EF0193	[P] ferrichrome ABC transporter, permease protein	Fur	agtgagaacgattctcaataaat	5.187 ± 0.237		5.34 ± 0.92
EF0475-EF0477	EF0475	NoCOG	Fur	attgagaacgattctcattttcg	2.211 ± 0.267		4.21 ± 0.81
EF0475-EF0477	EF0476	[P] ferrous iron transport protein B	Fur	attgagaacgattctcattttcg	2.792 ± 0.281		3.72 ± 0.59
EF0475-EF0477	EF0477	NoCOG	Fur	attgagaacgattctcattttcg	2.177 ± 0.132		3.92 ± 0.78
EF3082-EF3085	EF3082	[P] iron compound ABC transporter, substrate-binding protein	Fur	attgagaatgattctcattctta	2.202 ± 0.131		6.96 ± 1.89
EF3082-EF3085	EF3083	[P] iron compound ABC transporter, ATP-binding protein	Fur	attgagaatgattctcattctta	2.123 ± 0.233		6.51 ± 0.89
EF3082-EF3085	EF3084	[P] iron compound ABC transporter, permease protein	Fur	attgagaatgattctcattctta	3.329 ± 0.235		6.06 ± 1.11
EF3082-EF3085	EF3085	[P] iron compound ABC transporter, permease protein	Fur	attgagaatgattctcattctta	2.532 ± 0.142		6.01 ± 1.59
LexA regulon induced by Cu (4 operon)
					Microarray data (log 2 fold-change WT+Cu / WT)1		qPCR data (log 2 fold-change mutant / WT)2
Operon ID	GENE ID	COG Annotation	TF2	BS	WT 0.5 mM Cu		lexA▽
EF0066-EF0067	EF0066	[L] Holliday junction DNA helicase RuvA	LexA	gaacatatgtac	5.757 ± 0.427		2.51 ± 0.22
EF0066-EF0067	EF0067	[L] Holliday junction DNA helicase RuvB	LexA	gaacatatgtac	4.265 ± 0.333		2.85 ± 0.73
EF1975-EF1978	EF1975	[S] conserved hypothetical protein TIGR00046	LexA	gaatgtacgttc	2.906 ± 0.197		2.05 ± 0.43
EF1975-EF1978	EF1976	[J] ribosomal protein L11 methyltransferase	LexA	gaatgtacgttc	2.416 ± 0.207		2.35 ± 0.34
EF1975-EF1978	EF1977	NoCOG	LexA	gaatgtacgttc	2.051 ± 0.121		2.11 ± 0.01
EF1975-EF1978	EF1978	NoCOG	LexA	gaatgtacgttc	2.068 ± 0.023		2.81 ± 0.32
EF2756	EF2756	[L] DNA-damage-inducible protein P	LexA	gaacgtccgttc	2.548 ± 0.264		2.28 ± 0.09
EF3166-EF3172	EF3166	[L] DNA mismatch repair protein	LexA	gaacaaacattc	2.115 ± 0.127		2.51 ± 0.22
EF3166-EF3172	EF3167	[L] DNA mismatch repair protein	LexA	gaacaaacattc	2.049 ± 0.133		2.23 ± 0.23
EF3166-EF3172	EF3168	NoCOG	LexA	gaacaaacattc	2.651 ± 0.153		2.15 ± 0.29
EF3166-EF3172	EF3169	[S] conserved hypothetical protein TIGR00282	LexA	gaacaaacattc	2.261 ± 0.182		2.52 ± 0.29
EF3166-EF3172	EF3170	[R] HD/KH domain protein	LexA	gaacaaacattc	2.218 ± 0.219		2.83 ± 0.43
EF3166-EF3172	EF3171	[L] recombinase A	LexA	gaacaaacattc	2.721 ± 0.313		2.32 ± 0.33
EF3166-EF3172	EF3172	[R] competence/damage-inducible protein CinA	LexA	gaacaaacattc	2.573 ± 0.401		2.22 ± 0.31
1. Microarray WT data: All values were obtained from A. Reyes-Jara at al. Biometals 2010, 23. 1105-12. (data available NCBI-GEO database, accession number GSE20453).
2. qPCR data: Data analyses were performed as described previously in Latorre et al., Biochem Biophys Res Commun 2011, 406. 633-7). The gdh gene (EF1004) was used for normalization. In all of the cases, qPCR reactions were carried out in triplicate. The results were expressed as the fold change (log 2) between TF mutant strain and WT strain cultures. The statistical analyses were assessed by the …
Fold-change color significance
significantly up-regulated
